# Supplementary material for: Chitinolytic Enzymes of the Hyperparasite Fungus Aphanocladium album: Genome-Wide Survey and Characterization of A Selected Enzyme
Source: MDPI journal article supplement (doi:10.3390/microorganisms11051357), 2023-05-22
Supplement: s1 [file s1]

## SUPPLEMENTARY MATERIAL

### Chitinolytic enzymes of the hyperparasite fungus *Aphanocladium album*: genome-wide survey and characterization of a selected enzyme.

Claudia Leoni <sup>1</sup>, Caterina Manzari <sup>2</sup>, Matteo Chiara <sup>3</sup>, Pasqua Veronico <sup>4</sup>, Giovanni Luigi Bruno <sup>5</sup>,  
Graziano Pesole <sup>1,2,6</sup>, Luigi R. Ceci <sup>1,\*</sup> and Mariateresa Volpicella <sup>2,\*</sup>

<sup>1</sup> Institute of Biomembranes, Bioenergetics and Molecular Biotechnologies, CNR, Via Amendola 165/A, 70126 Bari, Italy

<sup>2</sup> Department of Biosciences, Biotechnologies and Biopharmaceutics, University of Bari "Aldo Moro", Via Amendola 165/A, 70126 Bari, Italy

<sup>3</sup> Department of Biosciences, Università degli Studi di Milano, Via Celoria 26, 20133 Milan, Italy

<sup>4</sup> Institute for Sustainable Plant Protection, CNR, Via G. Amendola 122/D, 70126 Bari, Italy

<sup>5</sup> Department of Soil, Plant and Food Sciences, University of Bari "Aldo Moro", Via Amendola 165/A, 70126 Bari, Italy

<sup>6</sup> Interuniversity Consortium for Biotechnology, Località Padriciano, 99, Area di Ricerca, 34149 Trieste, Italy

\* Correspondence: l.ceci@ibiom.cnr.it (L.R.C.); mariateresa.volpicella@uniba.it (M.V.)

#### CONTENT

Table S1. HMMER prediction of the main domains in GH18 sequences.

Table S2. HMMER prediction of the main domains in GH3 sequences.

Table S3. HMMER prediction of the main domains in GH20 sequences.

Table S4. HMMER prediction of the main domains in GH75 sequences.

Table S5. Summary of the Phyre2 analysis for the GH3 sequences of the *A. album*

Table S6. Summary of the Phyre2 analysis for the GH20 sequences of the *A. album*

Figure S1. Clustal alignment of *A. album* GH18 chitinases.

Figure S2. Clustal alignment of *A. album* GH3 sequences.

Figure S3. Clustal alignment of *A. album* GH20 sequences.

Figure S4. Clustal alignment of *A. album* GH75 sequences.

Figure S5. Expression of recombinant Chi1 mature protein.

Figure S6. SDS-PAGE (15% polyacrylamide gel) analysis of chromatographic fractions.

Figure S7. SDS-PAGE (15% polyacrylamide gel) of the purified Chi1 recombinant protein.

Table S1. HMMER prediction of the main domains in GH18 sequences.

|   | Id                           | Length | HMMER |     |         |         |           |     |
|---|------------------------------|--------|-------|-----|---------|---------|-----------|-----|
|   |                              |        | LysM  | C-R | GH18    | CBM     | Pept M508 | P-E |
| 1 | <a href="#">KAJ6787801.1</a> | 336    |       |     | 33-313  |         |           |     |
| 2 | <a href="#">KAJ6781922.1</a> | 445    |       |     | 30-317  | 415-441 |           |     |
| 3 | <a href="#">DAA05865</a>     | 392    |       |     | 31-307  | 360-388 |           |     |
| 4 | <a href="#">KAJ6780968.1</a> | 757    |       |     | 31-312  | 378-405 | 529-732   |     |
| 5 | <a href="#">KAJ6788767.1</a> | 324    |       |     | 38-310  |         |           |     |
| 6 | <a href="#">KAJ6787922.1</a> | 315    |       |     | 30-253  |         |           |     |
| 7 | <a href="#">KAJ6780669.1</a> | 423    |       |     | 137-380 |         |           |     |
| 8 | <a href="#">KAJ6780036.1</a> | 330    |       |     | 24-312  |         |           |     |

|    |              |      |         |         |         |  |           |
|----|--------------|------|---------|---------|---------|--|-----------|
| 9  | KAJ6780631.1 | 348  |         |         | 13-289  |  |           |
| 10 | KAJ6787472.1 | 365  |         |         | 42-298  |  |           |
| 11 | KAJ6779939.1 | 369  |         |         | 21-352  |  |           |
| 12 | KAJ6782108.1 | 363  |         |         | 1-335   |  |           |
| 13 | KAJ6782480.1 | 392  |         |         | 22-380  |  |           |
| 14 | KAJ6785755.1 | 574  |         |         | 31-338  |  |           |
| 15 | DAA05854     | 492  |         |         | 100-451 |  |           |
| 16 | KAJ6782844.1 | 540  |         |         | 157-501 |  |           |
| 17 | KAJ6786186.1 | 394  |         |         | 4-349   |  |           |
| 18 | KAJ6783291.1 | 428  |         |         | 42-388  |  |           |
| 19 | KAJ6787487.1 | 423  |         |         | 39-383  |  |           |
| 20 | KAJ6785998.1 | 1832 |         | 141-187 | 202-541 |  |           |
| 21 | KAJ6779834.1 | 532  |         |         | 153-493 |  |           |
| 22 | DAA05857     | 1533 | 308-355 |         | 520-848 |  |           |
| 23 | KAJ6783597.1 | 742  |         |         | 15-358  |  |           |
| 24 | KAJ6781350.1 | 671  |         |         | 86-435  |  |           |
| 25 | KAJ6786554.1 | 1495 |         |         | 496-844 |  | 1380-1481 |
| 26 | KAJ6789350.1 | 754  |         |         | 152-343 |  |           |
| 27 | KAJ6787215.1 | 1373 | 403-445 |         | 606-949 |  |           |
| 28 | KAJ6784990.1 | 1418 | 349-396 | 411-476 | 490-841 |  |           |
| 29 | KAJ6784672.1 | 1279 | 295-337 | 420-486 | 501-852 |  |           |

Legend (Pfam IDs are reported in brackets): LysM=LysM domain (PF01476); C-R=Chitin recognition protein (PF00187); GH18=Glycosyl hydrolases family 18 (PF00704); CBM= Fungal cellulose binding domain (PF00734); Pept\_M508= Peptidase M50B-like (PF13398); P-E=Pathogen effector; putative necrosis-inducing factor (PF14856).

**Table S2. HMMER prediction of the main domains in GH3 sequences**

|    | Id           | Length | HMMER  |         |         |         |         |
|----|--------------|--------|--------|---------|---------|---------|---------|
|    |              |        | WSC    | GH3-N   | GH3-C   | AT      | F-III   |
| 1  | KFG78085     | 909    |        | 28-357  |         |         |         |
| 2  | KAJ6788372.1 | 932    |        | 21-350  |         |         |         |
| 3  | AGC24356     | 858    |        | 8-336   |         | 552-655 |         |
| 4  | KAJ6789110.1 | 539    |        | 6-330   |         |         |         |
| 5  | KAJ6787877.1 | 370    |        | 32-364  |         |         |         |
| 6  | KAJ6782998.1 | 369    |        | 47-366  |         |         |         |
| 7  | KAJ6785893.1 | 870    | 32-113 | 169-461 | 499-724 |         |         |
| 8  | KAJ6786934.1 | 830    |        | 5-277   | 312-703 |         | 736-808 |
| 9  | KAJ6780833.1 | 760    |        | 46-324  | 369-634 |         | 681-747 |
| 10 | KAJ6787866.1 | 802    |        | 55-341  | 388-659 |         | 717-791 |
| 11 | KAJ6786079.1 | 777    |        | 85-334  | 382-642 |         | 700-766 |
| 12 | KAJ6785739.1 | 893    |        | 54-358  | 419-672 |         | 796-870 |
| 13 | KAJ6782204.1 | 948    |        | 166-420 | 485-751 |         | 868-939 |
| 14 | KFG84234     | 879    |        | 85-354  | 414-673 |         |         |
| 15 | KAJ6788989.1 | 883    |        | 97-356  | 416-677 |         | 804-873 |

Legend (Pfam IDs are reported in brackets): WSC=WSC domain for carbohydrate binding (PF01822); GH3-N=Glycosyl Hydrolase family 3 N-terminal domain (PF00933); GH3-C=Glycosyl Hydrolase family 3 C-terminal domain (PF01915); AT=Acetyl Transferase (GNAT) family (PF00583); F-III=Fibronectin type III-like domain (PF14310).

**Table S3. HMMER prediction of the main domains in GH20 sequences**

|    | Id                           | Length | HMMER   |         |         |         |
|----|------------------------------|--------|---------|---------|---------|---------|
|    |                              |        | GH20-2  | β-AH    | GH20    | β-AG    |
| 1  | <a href="#">KAJ6784096.1</a> | 848    | 157-304 |         | 307-638 |         |
| 2  | <a href="#">KAJ6785798.1</a> | 741    | 32-167  |         | 170-339 |         |
| 3  | <a href="#">KAJ6780494.1</a> | 661    | 48-191  |         |         | 197-508 |
| 4  | <a href="#">KAJ6785933.1</a> | 514    | 23-92   |         | 97-448  |         |
| 5  | KFG80340                     | 620    |         | 27-171  | 193-564 |         |
| 6  | <a href="#">KAJ6783033.1</a> | 633    |         | 28-184  | 207-577 |         |
| 7  | <a href="#">KAJ6780076.1</a> | 577    |         | 16-163  | 188-528 |         |
| 8  | <a href="#">KAJ6789215.1</a> | 751    |         | 204-335 | 360-628 |         |
| 9  | <a href="#">KAJ6787434.1</a> | 574    |         | 20-161  | 186-526 |         |
| 10 | KFG85702                     | 579    |         | 21-166  | 191-530 |         |
| 11 | <a href="#">KAJ6780083.1</a> | 579    |         | 19-165  | 190-529 |         |

Legend (Pfam IDs are reported in brackets): GH20-2=Glycosyl Hydrolase family 20 domain 2 (PF02838); β-AH=beta acetyl hexoaminidase like (PF14845); GH20=Glycosyl Hydrolase family 20 catalytic domain (PF00728); β-AG=beta-N-acetylglucosaminidase (PF07555).

**Table S4. HMMER prediction of the main domains in GH75 sequences**

|    | Id                           | Length | HMMER   |          |
|----|------------------------------|--------|---------|----------|
|    |                              |        | GH75    | A-L      |
| 1  | <a href="#">KAJ6785337.1</a> | 1093   | 667-836 | 877-1092 |
| 2  | <a href="#">KAJ6783761.1</a> | 252    | 80-249  |          |
| 3  | <a href="#">KAJ6781651.1</a> | 299    | 82-251  |          |
| 4  | BAA12799                     | 304    | 82-254  |          |
| 5  | <a href="#">KAJ6788818.1</a> | 300    | 81-253  |          |
| 6  | <a href="#">KAJ6786595.1</a> | 273    | 52-234  |          |
| 7  | ADG96019                     | 304    | 100-244 |          |
| 8  | <a href="#">KAJ6781485.1</a> | 256    | 105-249 |          |
| 9  | AA041660                     | 238    | 72-235  |          |
| 10 | <a href="#">KAJ6783315.1</a> | 232    | 70-231  |          |
| 11 | <a href="#">KAJ6787168.1</a> | 234    | 70-231  |          |
| 12 | ABY77913                     | 217    | 53-214  |          |

Legend (Pfam IDs are reported in brackets): GH75=Fungal chitosanase of glycosyl hydrolase group 75 (PF07335); A-L=Alginate Lyase (PF08787).

**Table S5. Summary of the Phyre2 analysis for the GH3 sequences of *A. album***

| GH3 sequence | Model | Enzyme                           | Cnf | Cvr | Id | Organism                            |
|--------------|-------|----------------------------------|-----|-----|----|-------------------------------------|
|              |       |                                  |     |     |    |                                     |
|              |       |                                  |     |     |    |                                     |
| KAJ6786934.1 | 3AC0  | $\beta$ -glucosidase             | 100 | 97  | 49 | <i>Kluyveromyces marxianus</i>      |
| KAJ6780833.1 | 4IID  | “ “                              | 100 | 94  | 47 | <i>Aspergillus aculeatus</i>        |
| KAJ6788989.1 | 5NBS  | “ “                              | 100 | 95  | 62 | <i>Neurospora crassa</i>            |
| KAJ6788372.1 | 4ZM6  | $\beta$ -N-acetylglucosaminidase | 100 | 89  | 30 | <i>Rhizomucor miehei</i> CAU432     |
| KAJ6782204.1 | 4IID  | $\beta$ -glucosidase             | 100 | 85  | 46 | <i>Aspergillus aculeatus</i>        |
| KAJ6785739.1 | 4D0J  | “ “                              | 100 | 91  | 42 | <i>Rasamsonia emersonii</i>         |
| KAJ6787866.1 | “ “   | “ “                              | 100 | 91  | 45 | “ “                                 |
| KAJ6785893.1 | 7VC7  | $\beta$ -xylosidase              | 100 | 84  | 51 | <i>Phanerochaete chrysosporium</i>  |
| KAJ6787877.1 | 6K5J  | $\beta$ -N-acetylglucosaminidase | 100 | 88  | 31 | <i>Paenibacillus</i> sp. str. fpu-7 |
| KAJ6789110.1 | 4ZM6  | “ “                              | 100 | 94  | 39 | <i>Rhizomucor miehei</i> CAU432     |
| KAJ6782998.1 | 6K5J  | “ “                              | 100 | 88  | 31 | <i>Paenibacillus</i> sp. str. fpu-7 |
| KAJ6786079.1 | 4D0J  | $\beta$ -glucosidase             | 100 | 93  | 43 | <i>Rasamsonia emersonii</i>         |

Model = PDB model; Cnf=confidence (%); Cvr=coverage (%)

**Table S6. Summary of the Phyre2 analysis for the GH20 sequences of *A. album***

| GH20 sequence | Model | Enzyme                           | Cnf | Cvr | Id | Organism                       |
|---------------|-------|----------------------------------|-----|-----|----|--------------------------------|
|               |       |                                  |     |     |    |                                |
| KAJ6780076.1  | 3NSN  | $\beta$ -N-acetylglucosaminidase | 100 | 90  | 31 | <i>Ostrinia furnacalis</i>     |
| KAJ6780083.1  | “ “   | “ “                              | 100 | 90  | 31 | “ “                            |
| KAJ6785933.1  | 3RCN  | “ “                              | 100 | 93  | 48 | <i>Paenarthrobacter aureus</i> |
| KAJ6783033.1  | 5OAR  | “ “                              | 100 | 79  | 67 | <i>Aspergillus oryzae</i>      |
| KAJ6780494.1  | 6PV5  | GH84 Hydrolase                   | 100 | 83  | 32 | <i>Clostridium perfringens</i> |
| KAJ6787434.1  | 3NSN  | $\beta$ -N-acetylglucosaminidase | 100 | 91  | 33 | <i>Ostrinia furnacalis</i>     |
| KAJ6784096.1  | 6JQF  | “ “                              | 100 | 72  | 24 | <i>Akkermansia muciniphila</i> |
| KAJ6785798.1  | “ “   | “ “                              | 100 | 82  | 25 | “ “                            |
| KAJ6789215.1  | 3LMY  | “ “                              | 100 | 62  | 30 | <i>Homo sapiens</i>            |

Model = PDB model; Cnf = confidence (%); Cvr = coverage (%); Id = identity (%)

## Figure S1

### B

|              |                                                              |     |
|--------------|--------------------------------------------------------------|-----|
| KAJ6780631.1 | -----                                                        | 0   |
| KAJ6787472.1 | -----                                                        | 0   |
| KAJ6780036.1 | -----                                                        | 0   |
| KAJ6787922.1 | -----                                                        | 0   |
| KAJ6780669.1 | MNWLKESIQLPFGGRKNSEASQTGTTASSTTDITSQAGWVDPEKAEAAANMQAASAKPET | 60  |
| KAJ6788767.1 | -----                                                        | 0   |
| KAJ6787801.1 | -----                                                        | 0   |
| KAJ6781922.1 | -----                                                        | 0   |
| DAA05865.1   | -----                                                        | 0   |
| KAJ6780968.1 | -----                                                        | 0   |
|              |                                                              |     |
| KAJ6780631.1 | -----                                                        | 0   |
| KAJ6787472.1 | -----MRWSLFSVVS-----LLAPLL-----QASPVGDVQAS---                | 27  |
| KAJ6780036.1 | -----MVGASPLT---                                             | 8   |
| KAJ6787922.1 | -----MHATSLIFAANI-----I                                      | 13  |
| KAJ6780669.1 | VAADDEKTTTKRQWPLWMKLAIAGCIFAVVVGLSVGLVGLTRHKHNGSPGGDSSSSSGD  | 120 |
| KAJ6788767.1 | -----MLFSTSAIA--AFAALT-----SLGAAAPANEGA                      | 27  |
| KAJ6787801.1 | -----MR--SSATFTALVAIT-----A                                  | 15  |
| KAJ6781922.1 | -----MR--SLS--LLAGLG-----L                                   | 12  |
| DAA05865.1   | -----MP--SISSFTSALGLL-----S                                  | 15  |
| KAJ6780968.1 | -----MV--SSSSVASVANLL-----A                                  | 15  |
|              |                                                              |     |
| KAJ6780631.1 | -----MPPLPIGPTPLPRLITYYQTLHDGDGK--PISILPL----ITQPSIAVTHVILA  | 48  |
| KAJ6787472.1 | ---AQASASTQAISELPRLIIFYQTTHDQSGR--PISMLPL----INEKGIALTHLIVC  | 77  |
| KAJ6780036.1 | --RRADTCATKGRPAGKVLQGYWENWDGSSNGVHPGFGWTPIQNPDIRKHGYNVINAAFP | 66  |
| KAJ6787922.1 | ASFTLASR-ARPRDASKKLAVYWGANDYQ-----LTLDVAVCSD-DSYNIVNLAF      | 61  |
| KAJ6780669.1 | SSSGSGSS-GGSPQRPKLAVYWGSKFNT-----IPLDDVCE-PSYDIVNLAF         | 168 |
| KAJ6788767.1 | S-----T-LRTRGAGGKLVVYWGAEEDN-----LSLMDVCND-PTYDIVNLAF        | 69  |
| KAJ6787801.1 | SVSAAPHTITSRADSGAQNVVYWGQNG---GG--VVENNDLATYCTKSAGIDIVVLSFL  | 69  |
| KAJ6781922.1 | TSLAAASPLAARQAPGARNVVYWGQNG---GG--TIENNDSLAYCQNSGIDIVVLAFL   | 66  |
| DAA05865.1   | LLPA--ARAGWNQNSNDNIVVYWGQNS---G--SVGQNRLSYCCQNAPDVDVINISFM   | 66  |
| KAJ6780968.1 | MLPV--AMAAFNPGSNKNIAVYWGQNSYNQSGG--PLAQQLRGTYCQNT-DLSIIPAFM  | 70  |
|              | *: ; .                                                       |     |
|              |                                                              |     |
| KAJ6780631.1 | AIHINEDPDG-----LTLND-----HSPDHERHQTAWAELR-----VLQAA-GIRVMVLL | 92  |
| KAJ6787472.1 | SLHINKDS-E-----IHLND-----YPPGDHPHYTLWNETA-----HMKKA-GVKVMGMI | 120 |
| KAJ6780036.1 | VI-YPDGTA---LWEDGMD-----TGVKVASPSDMCAAKAA-GATILMSI           | 106 |
| KAJ6787922.1 | SH-FFSAGGYPTLFLSPLNTASEAQAARGATDLRDGTSIPALQKC--RDS-GKKILLAM  | 117 |
| KAJ6780669.1 | SY-FFGNGQYPRLAIPSLNGSSEAQRLAGAVDLQDGTALVPAIKK--QAN-GKLVLLSM  | 224 |
| KAJ6788767.1 | AY-FNKAGGYPGLEMSGLDGPSAAQRKAGATGLKDGSPVPAIKK--QAN-GKLVILSM   | 125 |
| KAJ6787801.1 | YK-YGA-GQKIASGVIGQSCS-----IGDSGEGQNCDDLTKAIDTC--KSN-GVKVIMSL | 119 |
| KAJ6781922.1 | YQ-FGRDGGTIPSGTIGQSCF-----ISNSGEGQNCDALNAAIAKC--QGA-GVKMILSL | 117 |
| DAA05865.1   | VG-ITNL--NLNLANVGNCT---AFPPQAPNLLNCPQVAADIIEC--QQTYGKTIMMSL  | 117 |
| KAJ6780968.1 | NG-ITPA--ITNFANAGDNCT---AFPDNGNVLSCPQIEEDIKSC--QSKYGKTISLSL  | 121 |
|              | . : * : :                                                    |     |
|              |                                                              |     |
| KAJ6780631.1 | GGAAGKTYQRLDGSPDDESPAELARFERYYA-----PLRDLLRARGIDGIDLVEEEMS   | 146 |
| KAJ6787472.1 | GGAAPGSFDSSSLD-----GDQETFEKYYG-----QVKGVITKFGLEGMDLDVEQPMS   | 168 |
| KAJ6780036.1 | GGATAAI--DLSSSAVADKFV-S-----TIVPIKKYNGDGIDIDIESGLT           | 149 |
| KAJ6787922.1 | GGAPGYSDVRLNDDQGRQIA-NTLWNLFGG--GTEDAELRPFGAFKLDGFDIDNESGDA  | 174 |
| KAJ6780669.1 | GGAAGYSDVSGSDGTGQLVA-DLIWNLFGL--GGKKPEIRPFGNVVLDGVDFDNE      | 281 |
| KAJ6788767.1 | GGATDYSNVRLSNDAAAGEKVA-DQVWNLFGL--GTDHKELRPFGDVKL            | 182 |
| KAJ6787801.1 | GGAS-GA-YSLSSKEEAEAIQ-QLWEAYGNLNGGNGSVPRPFGKTFVNGWDFDIESNSG  | 176 |
| KAJ6781922.1 | GGAS-SS-YALSSQSQAQIG-QYLWDSYGN--SGNTTVKRPLGNVVDGDFDFDIELNGG  | 172 |
| DAA05865.1   | FGST-YSESGFSSSSAAVAAA-QEIWAMYGPVQSGN-STPRPFGDAVVDGDFDFDLEPIE | 174 |
| KAJ6780968.1 | GGAT-YSQGWSSSSAAESAA-QMVWDMFGPVGSGK-NVDRPFGSAVVDGDFDFDESS-A  | 177 |
|              | *: . : * * * *                                               |     |
|              |                                                              |     |
| KAJ6780631.1 | -LAGIVRLI-----DRLRADF---GPQFIITLAPVAASLLDPTANLS---GFDYEAL    | 191 |
| KAJ6787472.1 | -QSGITRLI-----ERLRQDF---GSGFIITLAPVASAL-RNSANLS---GFNYKTL    | 212 |
| KAJ6780036.1 | GSQDIKTLSTSQSNLIRVDGILA-QMPSNFGLTMAPETAYVTGGSVTYGSIWGSYLP    | 208 |
| KAJ6787922.1 | --TGYMAMI-----DQFRSNFATDTSREYTLAAPGCGFPGD-----SI             | 211 |

|              |                                        |                                    |     |
|--------------|----------------------------------------|------------------------------------|-----|
| KAJ6780669.1 | --TGYEAMA-----QHFRSHFASDPSKQYYMTAAPQC  | PFTAD-----DE                       | 318 |
| KAJ6788767.1 | --TGYLAMT-----KRFRANMAKDASKKYLTAAPOC   | PFPDQ-----SE                       | 219 |
| KAJ6787801.1 | -NQFYPDMI-----AKLRGNFASDSSNQYFITGAPQC  | PIPEP-----NM                       | 214 |
| KAJ6781922.1 | SSQYYQYMI-----AKLRQNFAKDSSKKYYIAGAPQC  | PIPEP-----NM                       | 211 |
| DAA05865.1   | --NNMEPFA-----AELRSLIDASTSKKFYLSAAPQC  | PYPDV-----SD                       | 211 |
| KAJ6780968.1 | --NNLPAPG-----AKLRSLMDSAGGKKYYLSAAPQC  | VFPDA-----AV                       | 214 |
|              | : : : : : **                           |                                    |     |
| KAJ6780631.1 | EVMR--GREVAWYNTQFYCGWGDFSST-----       | VMYDMMLRKGWAP-----                 | 229 |
| KAJ6787472.1 | NTAV--GSKISFYNGQFYSGFGTMART-----       | DDYVKIVDNGFAA-----                 | 250 |
| KAJ6780036.1 | KKYVD--NGRLWWLNMQYYNGDMYGCSCG-----     | DSYKAGTTQGFIAQTDCLNNGLTIGG         | 260 |
| KAJ6787922.1 | TPEI--AGAVDHVWIQFYDTKYCLIGD-----       | DTFYG-KVRTWSQ-----                 | 248 |
| KAJ6780669.1 | ELSL--FQHLDYVSVQFYNNNVCNVQ-----        | SGFET-SVRRWSE-----                 | 355 |
| KAJ6788767.1 | PLSV--CKLLDYVWVQFYNNNGDCNIAQ-----      | SGFNA-AVKNWSK-----                 | 256 |
| KAJ6787801.1 | NEIIT-KAHFDYLFVQFYNNNPGCSVD-----       | GTINFEDWKKNVANT-----               | 254 |
| KAJ6781922.1 | GEIIS-TSQFDWLFVQFYNNNNYTVPCALPINGNAPFN | YNNWTSFIST-----                    | 259 |
| DAA05865.1   | ESFLDGQVPFDWVNVQFYNNNGCGVSHYP-----     | ADFNWATWDNNAKT-----                | 254 |
| KAJ6780968.1 | GAALD-AVAFDFVMIQFYNNWCGVSNFQEGASSQNA   | FNFDVWDKWAKGS-----                 | 262 |
|              | . * : *                                |                                    |     |
| KAJ6780631.1 | -----EKVVVGLVTNPAN-----                | GPGFIAWDSLQOTLAIL-RQRPHNFGGIMGWEY  | 274 |
| KAJ6787472.1 | -----SKVVAGQLTDPSN-----                | GGGYIPYSQNLNATIAL-RKKYQIGGVMGWEY   | 295 |
| KAJ6780036.1 | VTIKVPYDKQVPGLPAQPGA-----              | GGGYMSTSDVSSVLNHY---NGNLKGLMTWSL   | 309 |
| KAJ6787922.1 | ---AVKG-DIYGATARNT-----                | DQVGYLEPHALLTALHKVEAMGLPNYSGAMLWEA | 298 |
| KAJ6780669.1 | ---AIGNTTLLVGALASNAD-----              | KDEGYVDAKTFNSVLGKVKAMNLPNYGGVMLWEA | 406 |
| KAJ6788767.1 | ---GIGNAKLFIGGLASGSD-----              | GDQGYVDSNTFIKAIKGVAMNLPNYGGAMLWEA  | 307 |
| KAJ6787801.1 | ---PSSSAKIFIGVPASPLGATGTESGAKYYLEPTKL  | ASLVGEH--KSDAAFGGVMMWAA            | 309 |
| KAJ6781922.1 | ---PSKDAKIFIGVPASTLASNGSPNGATYYATPEQL  | ATIVNDY--KSDAHFGGIMMWSA            | 314 |
| DAA05865.1   | --SANKNAKVLIGTPANVGGANAG-----          | SFPTDSQLSGAISLA--KGSSSFGGVMLWDM    | 305 |
| KAJ6780968.1 | ---KNPNVKLLLGIPAAPGA--GG-----          | GYTSGSKLKAAINYS--QKYSSFGGVMLWDM    | 310 |
|              | * : : * * *                            |                                    |     |
| KAJ6780631.1 | YNSLPGDRERPWEWARTMTAMI---RSH-CLAPAPPV  | ATP-PRPEEKP----AAVVDID             | 324 |
| KAJ6787472.1 | FNSQPGGTKEPWKWAQVMTQIL---RPN-AVPKLSIT  | AD-AD---H-----LTNTYE               | 340 |
| KAJ6780036.1 | NWDGSKNWSFGDN-----                     | VKGTLGTA-----                      | 330 |
| KAJ6787922.1 | ELAMKN-KNYQKT-----                     | LRAGL-----                         | 315 |
| KAJ6780669.1 | ELAAKN-GNYQKK-----                     | IKAEL-----                         | 423 |
| KAJ6788767.1 | QLSRNN-GNFAKK-----                     | IRSSL-----                         | 324 |
| KAJ6787801.1 | GFSDAN-VNNGCTYAQEAKHILTGSAC-----       |                                    | 336 |
| KAJ6781922.1 | GFSDSN-VNNGCTYAQEAKHILVNGGPCGSNGPPP    | PTSTPPTSTAPPTGTPPSTSTTST           | 373 |
| DAA05865.1   | AQLFT---NQGYL--A---KIVADLGSASSPPPP     | PASTTLQ-----TIT                    | 340 |
| KAJ6780968.1 | SQLYS---NNGFL--G---EVLSDISGGPATTPPP    | STTTQPPGTTTQPPGTT---TTCT           | 358 |
|              | . :                                    |                                    |     |
| KAJ6780631.1 | ADA---PGGEELEIP--APFEYYSDGAEE-----     |                                    | 348 |
| KAJ6787472.1 | HTV---SGGSPNARPASPGINYYDMVNA-----      |                                    | 365 |
| KAJ6780036.1 | -----                                  |                                    | 330 |
| KAJ6787922.1 | -----                                  |                                    | 315 |
| KAJ6780669.1 | -----                                  |                                    | 423 |
| KAJ6788767.1 | -----                                  |                                    | 324 |
| KAJ6787801.1 | -----                                  |                                    | 336 |
| KAJ6781922.1 | HPCASHTSSSPPVSSPRGTVPQWQVRRNEERRDGE    | FANIKKCGGKGYNPTCEVPPFT             | 433 |
| DAA05865.1   | RSS--TASTGPTNPPSGGSVPQWG-----          | QCGNGYTGTQCQAPYK                   | 380 |
| KAJ6780968.1 | STT--TPASTSTPPPTSGGLDQYA-----          | QCGGQGYSGPTVCKAPYT                 | 398 |
| KAJ6780631.1 | -----                                  |                                    | 348 |
| KAJ6787472.1 | -----                                  |                                    | 365 |
| KAJ6780036.1 | -----                                  |                                    | 330 |
| KAJ6787922.1 | -----                                  |                                    | 315 |
| KAJ6780669.1 | -----                                  |                                    | 423 |
| KAJ6788767.1 | -----                                  |                                    | 324 |
| KAJ6787801.1 | -----                                  |                                    | 336 |
| KAJ6781922.1 | CVKLGEWWSSCR-----                      |                                    | 445 |
| DAA05865.1   | CVATSEWWSSCQ-----                      |                                    | 392 |
| KAJ6780968.1 | CVKQNTLPSRLTSATSSHLHLAQATTLLQLLFFIAL   | RSVAFTFCDDPRVHSSPGSLTRA            | 458 |
| KAJ6780631.1 | -----                                  |                                    | 348 |

|              |                                                              |     |
|--------------|--------------------------------------------------------------|-----|
| KAJ6787472.1 | -----                                                        | 365 |
| KAJ6780036.1 | -----                                                        | 330 |
| KAJ6787922.1 | -----                                                        | 315 |
| KAJ6780669.1 | -----                                                        | 423 |
| KAJ6788767.1 | -----                                                        | 324 |
| KAJ6787801.1 | -----                                                        | 336 |
| KAJ6781922.1 | -----                                                        | 445 |
| DAA05865.1   | -----                                                        | 392 |
| KAJ6780968.1 | AYYQLAKTALLRRFEASYIMAPSFSTSSGILETHNPVRIFGQKPEPSPGLSLASRSLQHP | 518 |
|              |                                                              |     |
| KAJ6780631.1 | -----                                                        | 348 |
| KAJ6787472.1 | -----                                                        | 365 |
| KAJ6780036.1 | -----                                                        | 330 |
| KAJ6787922.1 | -----                                                        | 315 |
| KAJ6780669.1 | -----                                                        | 423 |
| KAJ6788767.1 | -----                                                        | 324 |
| KAJ6787801.1 | -----                                                        | 336 |
| KAJ6781922.1 | -----                                                        | 445 |
| DAA05865.1   | -----                                                        | 392 |
| KAJ6780968.1 | NHTQQVTLGVIAAYVVVIAILWNVPYIKNILWPFKMLVIAFHEFGHAITAVFTGGRVKSI | 578 |
|              |                                                              |     |
| KAJ6780631.1 | -----                                                        | 348 |
| KAJ6787472.1 | -----                                                        | 365 |
| KAJ6780036.1 | -----                                                        | 330 |
| KAJ6787922.1 | -----                                                        | 315 |
| KAJ6780669.1 | -----                                                        | 423 |
| KAJ6788767.1 | -----                                                        | 324 |
| KAJ6787801.1 | -----                                                        | 336 |
| KAJ6781922.1 | -----                                                        | 445 |
| DAA05865.1   | -----                                                        | 392 |
| KAJ6780968.1 | SLDPNEGGVTKMVGGISAITLPAGYLGSSIIGALLTFCGFNIVASKIASIVLGVCFLTL  | 638 |
|              |                                                              |     |
| KAJ6780631.1 | -----                                                        | 348 |
| KAJ6787472.1 | -----                                                        | 365 |
| KAJ6780036.1 | -----                                                        | 330 |
| KAJ6787922.1 | -----                                                        | 315 |
| KAJ6780669.1 | -----                                                        | 423 |
| KAJ6788767.1 | -----                                                        | 324 |
| KAJ6787801.1 | -----                                                        | 336 |
| KAJ6781922.1 | -----                                                        | 445 |
| DAA05865.1   | -----                                                        | 392 |
| KAJ6780968.1 | WWGKRDWLTVLTVLLAVALLVACWFIKHAEALRFVVLFIGVMSSLYSVWDICDDLILRKV | 698 |
|              |                                                              |     |
| KAJ6780631.1 | -----                                                        | 348 |
| KAJ6787472.1 | -----                                                        | 365 |
| KAJ6780036.1 | -----                                                        | 330 |
| KAJ6787922.1 | -----                                                        | 315 |
| KAJ6780669.1 | -----                                                        | 423 |
| KAJ6788767.1 | -----                                                        | 324 |
| KAJ6787801.1 | -----                                                        | 336 |
| KAJ6781922.1 | -----                                                        | 445 |
| DAA05865.1   | -----                                                        | 392 |
| KAJ6780968.1 | NSSDASVFAKRYGGSSQCWGIIWSIISVLIMAVGIVAGLAAFSQSFAQQQEDSKHFIPT  | 757 |

## A

|                               |                                                                                                         |     |
|-------------------------------|---------------------------------------------------------------------------------------------------------|-----|
| KAJ6779939.1                  | -----                                                                                                   | 0   |
| KAJ6782108.1                  | -----                                                                                                   | 0   |
| KAJ6782480.1                  | -----                                                                                                   | 0   |
| KAJ6785755.1                  | -----                                                                                                   | 0   |
| KAJ6786186.1                  | -----                                                                                                   | 0   |
| KAJ6783291.1                  | -----                                                                                                   | 0   |
| KAJ6787487.1                  | -----                                                                                                   | 0   |
| DAA05854.1                    | -----MFRLLCIGLPLL---AR-----VAVAVPATLSERCDA PNP---PASSLT---                                              | 38  |
| KAJ6782844.1                  | MLQSAIILPLLALGVRGAPAGSGDGVSAACRVVWVPVSVDTTVQAPSATNTATSPLTDGR                                            | 60  |
|                               |                                                                                                         |     |
| KAJ6779939.1                  | -----                                                                                                   | 0   |
| KAJ6782108.1                  | -----                                                                                                   | 0   |
| KAJ6782480.1                  | -----                                                                                                   | 0   |
| KAJ6785755.1                  | -----MD-----                                                                                            | 2   |
| KAJ6786186.1                  | -----                                                                                                   | 0   |
| KAJ6783291.1                  | -----MLKLLKNSVAVTAA-----                                                                                | 14  |
| KAJ6787487.1                  | -----MLSFVKKSIALVAA-----                                                                                | 14  |
| DAA05854.1                    | -----ESVAAISSGPLPFDTEMGDVETVHRE---PFDVAVPG                                                              | 72  |
| KAJ6782844.1                  | AGAAYSSGRENKFVLPQGASSTKPDTTAAIQSTSTTMDRPSKVTSAVTRTASSNKLSPGTG                                           | 120 |
|                               |                                                                                                         |     |
| KAJ6779939.1                  | -----MKTSP L T L L A A A S T A A A A P R N V M Y F D Q W H T A T ---LPP                                 | 36  |
| KAJ6782108.1                  | -----MYLTGQHNV I ---PED                                                                                 | 13  |
| KAJ6782480.1                  | -----MHLGSIYS----AVLAFTTTGVLGKNIVGYPSWKRQY----AD                                                        | 36  |
| KAJ6785755.1                  | -----SSSVASASLPSTPTLQTRFPPELGQVMYMNNAVYFHNSHI-ARDETPA                                                   | 48  |
| KAJ6786186.1                  | -----MSYRSVAYYVNWAIYARKHLPQ                                                                             | 22  |
| KAJ6783291.1                  | -----LYAFTA----LATLIT----SDSTIGKRESGYVNAVYYTNWAIYLRNFQPS                                                | 57  |
| KAJ6787487.1                  | -----LQAVTA----LATPIS----SEAGVEKRGSGFANAVYFTNWGIYGRNFQPA                                                | 57  |
| DAA05854.1                    | -----SSGVSI EHG HG ----SEVVGF GPTSRKKNVVYYADWSIYDA AFLPQ                                                | 118 |
| KAJ6782844.1                  | TSTSTITVTKTITRSGQKPAYTPG-----TDQDDGVEIKGRKNVVYFTNWSGYGANYTAA                                            | 175 |
| *<br>                         |                                                                                                         |     |
| KAJ6779939.1                  | KDVTAGVTHVITAFAP----DGTFNWGS---SYTPFMSL-----                                                            | 68  |
| KAJ6782108.1                  | VQLRKEITHVVLAFVR----SEMFNVESPHPDYPLFTSV-----                                                            | 48  |
| KAJ6782480.1                  | NMDLSLYTHINF AFAI PAQ-DGSFSFDGDWFL-----PG----                                                           | 69  |
| KAJ6785755.1                  | KLDYGFINLVYAYASVAP-DGIVNLGDEWADIRAPVDG-----VEGGLGS                                                      | 93  |
| KAJ6786186.1                  | DLPAENITHVLVSFANVRSENGEVFMTDGWADTDIHWEGDS----WNDSGTNIYGCCLKQ                                            | 77  |
| KAJ6783291.1                  | DLIVSDITHILYSFMNLR T-DGVVYSGDTYADYEKHYPGDS----WTEGVKNAYGCVKQ                                            | 111 |
| KAJ6787487.1                  | DLPASEITHVLVSFMNVRA-DGTIFSGDTYADYEKHYAGDS----WNDVGTNAYGCVKQ                                             | 111 |
| DAA05854.1                    | QLPAEDITHLLYAFAGIED-DGSVVSMDPWAD E EKMLSVPGGPGRNDTQGLNDVHGA VEQ                                         | 177 |
| KAJ6782844.1                  | EFFANDVTHLLYAFGDISS-TGEVIPSDSWIDIQKQFAGPQ---KRDV---QAQGNIGQ                                             | 227 |
| . : :: . .                    |                                                                                                         |     |
|                               |                                                                                                         |     |
| KAJ6779939.1                  | SDIRALFDQGTKVCMAIGGWGDDT--GFGTAAASDES R KRYAKNVAEALNTLG YDCVVDV                                         | 126 |
| KAJ6782108.1                  | KEVREKFPP TTKILVAIGGWGNSL--GFEEAALDDASRKRWRTRNVKHMVETTGA DGV D I D                                      | 106 |
| KAJ6782480.1                  | -VVS KLHDKGVKALMSVGGWTGSN--YFSTILKDQTAGANLVANIVSYVKANS L D G I D I D                                    | 126 |
| KAJ6785755.1                  | LMQLKQRYRHLKVL LSI GGP AAS--GVFVSIASNPATRN NFAYTAAGLVVASGL D G V D I S                                  | 151 |
| KAJ6786186.1                  | LNILKKRRNRNFKVMLSIGGW TYSS--NFPAPASTPEGRDTFAKSCVELVKNLGF D G I D I D                                    | 135 |
| KAJ6783291.1                  | LYLLKKQNRNVK VILSIGGWNWRA--NFPAASSSAETRKTFAQS AVELMKDWGF D G I D I D                                    | 169 |
| KAJ6787487.1                  | LYLLKKQNRNMKVMLSIGGWTWST--NFPAAASSAATRKTFAQSAVGFMKDWGF D G I D I D                                      | 169 |
| DAA05854.1                    | VFLKKRHRHMKTL LSI G G W N M S Q S G K F A P V L N T N E G R I R F A K T A V N L L A N W G L D G I D I D | 237 |
| KAJ6782844.1                  | IFGLKKQNRNLKVLISVGGFTYSEAGKFVPATNTTEGRQRFARS AVKLIANWGF D G I D I D                                     | 287 |
| * : : * * * . . : . * : * : . |                                                                                                         |     |
|                               |                                                                                                         |     |
| KAJ6779939.1                  | WEYPGGNGEDYKQNPNSGKTAEIETYPLLLKEIKAVIGD-----K-ELSIAPVPGKV                                               | 176 |
| KAJ6782108.1                  | WEYPGGRDDYKVI TNDQREWEIDAYHLLLKELRETIGR-----NKIISIAPVPLE                                                | 157 |
| KAJ6782480.1                  | WEYPGR LGNNCAYD---PQSDAQNF LAFLQTLRQKLD AEFGRK---KLLTLAMRVQP                                            | 179 |
| KAJ6785755.1                  | WHVPAD-----PVQGANFLALAQAVRSKLQG-----GRMLTAALPAN-                                                        | 188 |
| KAJ6786186.1                  | WEYPKS-----AEEAGHFVELLA E VRKQLDEYSARAADNYHFELSVACPA G-                                                 | 181 |
| KAJ6783291.1                  | WEYPSN-----DTEAQNMV LLLQAVREELDSYAAHYADGHHFLLSIAAPAG-                                                   | 215 |
| KAJ6787487.1                  | WEYPAD-----ATQ AQNMV LLLQAVRSELD SYAAQYAKGHHFLLSIAAPAG-                                                 | 215 |
| DAA05854.1                    | WEYPIN-----EREAVGFVDLLRECRKALDEYASLHNQRYHYLLTA AVSAA-                                                   | 283 |
| KAJ6782844.1                  | WEF PKD-----KSEAA NFV SLLQEIRYELDKYASDNNQKYHYLLTVATSAG-                                                 | 333 |
| : . * : : : : : : : *         |                                                                                                         |     |



|              |                                                                  |     |
|--------------|------------------------------------------------------------------|-----|
| KAJ6779939.1 | GDMIAFTAQVQPKISETVDFVNVMTYDLMNRRDTSTDHSSVS-----GSLATV            | 225 |
| KAJ6782108.1 | RDLMAFTANTVQPKIVQVDFINIMTYDLINRRDVTVVQHSGVA-----DSRASI           | 206 |
| KAJ6782480.1 | FDGPNGLSDVSAFAKVVDYGNLMQYDINGGWNSVTGPLAPFNFESGRGA--QVSFVSAI      | 237 |
| KAJ6785755.1 | --PAVLQHIIDLAVAAESLDFINLQTYNLHHAQPGRSILCPSQLYSMAKDEP---STSTVA    | 242 |
| KAJ6786186.1 | --PDNFQKLNI PGMDAYLDFWNLMAYDYAGSWDQVSGHQANLYPCNDNPACTPFSTTA      | 239 |
| KAJ6783291.1 | --PEKYKKRLADLGKVL DYINLMAYDFAGSWSNYTTNANLYANPQNPNATPFNTEDAV      | 273 |
| KAJ6787487.1 | --PDNYNKLKFAELGKVL DYINLMAYDYAGSWSNYTGHDANIYANPQNPNATPYNTDDAV    | 273 |
| DAA05854.1   | --QQHYKWLDMPAIDRYLDAWHLMAYDYAGSWDDLSDGQSNVFDATNPHRTRANSDQAV      | 341 |
| KAJ6782844.1 | --PSKYKLLNLGAMDKFVDSWHL MAYDYAGSWDSTTGHQANVYDPDSNTASTKFNTEQAV    | 391 |
|              | . : * : * : : . .                                                |     |
| KAJ6779939.1 | ETYSLRGMPAAKMNLGFAFYAKWFTTKDGATCDQATGCPTAVLEDANGGD-TGK-----      | 278 |
| KAJ6782108.1 | QRYLDRGVPRSMANLGLGYVVKWVMTDP-CERDDILGCPTQLLEDPDSGNLGR-----       | 259 |
| KAJ6782480.1 | DAWTAAGWPAQQLNAGYAFYGLSTTALEDMTKDPT-----NQYQPPQSSTVPLGDKEDASW    | 292 |
| KAJ6785755.1 | GYILSRNFPAQKLLLGIPTFGTSFPGCDGPGQ-----AYDPAE-----                 | 280 |
| KAJ6786186.1 | DYYTQNGVAPDKLVLGMPLYGRAFENC DGIGK-----PFQGVG-----                | 277 |
| KAJ6783291.1 | KAYVSEGIPANKIVLGMPIYGRSFQQT EGIGK-----PYNGIGE-----A--            | 313 |
| KAJ6787487.1 | QAYINGGV PANKIVLGMPIYGRSFQQT EGIGK-----PYNGIG-----               | 311 |
| DAA05854.1   | NDYVAAGVNPEKIIILGIPLYGRSFMNTDGP GK-----PYEGVG-----               | 379 |
| KAJ6782844.1 | NDYIAAGIAPEKIIILGLPLYGRSFMQTS G MGQ-----SFNGTG-----              | 429 |
|              | . * :                                                            |     |
| KAJ6779939.1 | -----SGAVT FEKE-----NYSGAFLNAMNNGKADNEKGQWYWDASAKV               | 318 |
| KAJ6782108.1 | -----TAAFSWHDN-----VPSELSASF SRALNRGR--YFEDGSYGYWDEQEH           | 301 |
| KAJ6782480.1 | YDACAGATSNSGTWQWKHL LDQGVLSAPT TASAPWV-----RQWDNTTQT P WLFNPQTSI | 347 |
| KAJ6785755.1 | -----SQSMDYLG L P VAGRQ-----EGIDRRRISAYCAGG-PEG                  | 313 |
| KAJ6786186.1 | -----QGTWEQGVYDYKKLPLEGAE-----EHQDDASGATYCYNPQSRT                | 316 |
| KAJ6783291.1 | --SFGQGSWENG VWDYKALPRAGAT-----VT CDDTAKGCYSYNANTQE              | 355 |
| KAJ6787487.1 | -----SGSWENGIWDYKALPKAGAT-----VKCDDTAKGCYSYDPSTKE                | 350 |
| DAA05854.1   | -----KGSIEKGVWLYRDLPRPGSV-----VNLNRDI I AAYSYDNATRE              | 418 |
| KAJ6782844.1 | -----EGGVEAGVWLYKDLPRPGAT-----VTVDS DVLAAYSYDPKERM               | 468 |
|              | : .                                                              |     |
| KAJ6779939.1 | YWTWLTPEFIAKKMTDIVKAKGLGGVMA-----WSLAQDSHDWSH-IKA                | 361 |
| KAJ6782108.1 | WWSFDTPDVIARKMKELVGS MGLGGVFA-----WGLGEDATDFAR-LAA               | 344 |
| KAJ6782480.1 | FISYEDPVSLKV K V-DYAASKGLAGAMV-----WSVNMDSSN-TLLKV               | 389 |
| KAJ6785755.1 | FIAYDNPD TVKEKA-DFCKQKGFGWTT PKGASDDATPEHWPRCVWGASARSSR-CSLACV   | 371 |
| KAJ6786186.1 | LVTYDTPQLAKTKA-QF I KERGLGGGMW-----WESSADKAGGDSL IQT             | 359 |
| KAJ6783291.1 | LISFDT PSMISTKV-EWLKGNGLGGS MF-----WEASADKKGSDSLIGT              | 398 |
| KAJ6787487.1 | LISFDT PAMISTKV-SWLK GKGLGGS MF-----WEASADKKGSDSLIST             | 393 |
| DAA05854.1   | LVTYDNMETTTLKA-EYLGKKGLGGAVF-----WEASGDRSGDES LIKA               | 461 |
| KAJ6782844.1 | LITYDNKESANLKA-QYLMKKGLGGAVF-----WDASGDKPGNGSLIST                | 511 |
|              | ::: * . *: . *                                                   |     |
| KAJ6779939.1 | LQS---GIKS--L-----                                               | 369 |
| KAJ6782108.1 | TVD---GIRA--LHNSRDAGKDE-----L-----                               | 363 |
| KAJ6782480.1 | LRG-----                                                         | 392 |
| KAJ6785755.1 | VTARADKIAAPDLASQQAMATSSADADAASRTSLSPPRNPTAGATETTTDQKRRGVVQQL     | 431 |
| KAJ6786186.1 | VVGEFGGPGA--LKQ QENC-----ISYPETKYDNL-----RNLGPDN-                | 394 |
| KAJ6783291.1 | SRQ---GLGS--LDGTQNY-----LHYPNSTYDNI-----KKGMN--                  | 428 |
| KAJ6787487.1 | SHQ---GLGS--QDSTQNY-----LDYPNSKYDNI-----KKGMN--                  | 423 |
| DAA05854.1   | VAR---KMAL--LDISMNM-----LSYPQSQFSNI-----RNATRW--                 | 492 |
| KAJ6782844.1 | LAR---SIWP--LESSQNM-----LEY PKSEYANI-----RANS----                | 540 |
| KAJ6779939.1 | -----                                                            | 369 |
| KAJ6782108.1 | -----                                                            | 363 |
| KAJ6782480.1 | -----                                                            | 392 |
| KAJ6785755.1 | SAADCSVGDDSGAVTSSIAFGGSVPVAAAAAEHISSETEQQPPPPPPFEPLFALLTNT       | 491 |
| KAJ6786186.1 | -----                                                            | 394 |
| KAJ6783291.1 | -----                                                            | 428 |
| KAJ6787487.1 | -----                                                            | 423 |
| DAA05854.1   | -----                                                            | 492 |
| KAJ6782844.1 | -----                                                            | 540 |
| KAJ6779939.1 | -----                                                            | 369 |
| KAJ6782108.1 | -----                                                            | 363 |

|              |                                                             |     |
|--------------|-------------------------------------------------------------|-----|
| KAJ6782480.1 | -----                                                       | 392 |
| KAJ6785755.1 | TTGATVHPRIHYIFSDDDTSIPTDTAAHQHGDADHRSLVVALQPPDDHNDGAESNEIHD | 551 |
| KAJ6786186.1 | -----                                                       | 394 |
| KAJ6783291.1 | -----                                                       | 428 |
| KAJ6787487.1 | -----                                                       | 423 |
| DAA05854.1   | -----                                                       | 492 |
| KAJ6782844.1 | -----                                                       | 540 |

|              |                       |     |
|--------------|-----------------------|-----|
| KAJ6779939.1 | -----                 | 369 |
| KAJ6782108.1 | -----                 | 363 |
| KAJ6782480.1 | -----                 | 392 |
| KAJ6785755.1 | PGALRSGSASQSQDTTPTTSA | 574 |
| KAJ6786186.1 | -----                 | 394 |
| KAJ6783291.1 | -----                 | 428 |
| KAJ6787487.1 | -----                 | 423 |
| DAA05854.1   | -----                 | 492 |
| KAJ6782844.1 | -----                 | 540 |

## C

|              |                                                             |    |
|--------------|-------------------------------------------------------------|----|
| KAJ6785998.1 | -----                                                       | 0  |
| KAJ6779834.1 | -----                                                       | 0  |
| KAJ6783597.1 | -----                                                       | 0  |
| KAJ6789350.1 | -----                                                       | 0  |
| DAA05857.1   | -----MPWISPGGIACWLASATAIVSF---H--G--VSATANEVDA              | 34 |
| KAJ6784990.1 | MQ-----YHTSAALTALAGLGLFPLASGIT-S                            | 27 |
| KAJ6787215.1 | MRLTIFTGATLLASTAHVSATVQSGLRPVSLAARMSASDFA-NVDTGGDELAAWLKASA | 59 |
| KAJ6784672.1 | MRR-----TPSQVAA-----AVSLLASVATAVTESY                        | 26 |
| KAJ6781350.1 | -----                                                       | 0  |
| KAJ6786554.1 | --M-----APSWFNAALGATSVLLSTNALVAASSPSRIGASI                  | 35 |

|              |                                                              |     |
|--------------|--------------------------------------------------------------|-----|
| KAJ6785998.1 | -----                                                        | 0   |
| KAJ6779834.1 | -----                                                        | 0   |
| KAJ6783597.1 | -----                                                        | 0   |
| KAJ6789350.1 | -----                                                        | 0   |
| DAA05857.1   | FQSQLNLCPLACSDKS-----PEQWSVYSSFERLSQCDQPVLFDLAIHTPINDKTNVLI  | 89  |
| KAJ6784990.1 | FGDYADLCPVACTSN-----PSQWTKYHSLDRLAGCEADLFLDFNTLLKQVDSN--TVF  | 79  |
| KAJ6787215.1 | QSAIVKACPEACSELKDGEDGTTGLSLIPDENMLSRCNETMLVDLVVKSK-----DSKAI | 114 |
| KAJ6784672.1 | QGQYPDDCPQLCEVAGPARGN---WTHVHHLKDLSSCKNDMIFDFNVHNLVDDPNTILTI | 83  |
| KAJ6781350.1 | -----                                                        | 0   |
| KAJ6786554.1 | SYRGSERCPRSCADAGADSFA---WDSFRSMDEVDQCGNPMLFNFALADRVDEHGRNHRI | 92  |

|              |                                                             |     |
|--------------|-------------------------------------------------------------|-----|
| KAJ6785998.1 | -----                                                       | 0   |
| KAJ6779834.1 | -----                                                       | 0   |
| KAJ6783597.1 | -----                                                       | 0   |
| KAJ6789350.1 | -----                                                       | 0   |
| DAA05857.1   | RACTTSPAAGGSQPMASIVK-----REAEACGGSFVESKVPLLISQNPQG          | 134 |
| KAJ6784990.1 | RTCSLASDAKPPTELAE LTSNNK-----LSVSDDCGATVKQNVTIATSSAGAV      | 128 |
| KAJ6787215.1 | RACMGDYGENVKAAAFKADSSKAALCDTPNYNLTSTMTFSG-----F-PQSIQGTSE   | 166 |
| KAJ6784672.1 | RACTTISNETYD-----TRSQFIRDEGVSQSSLV-ISDSCGAKTVKSPLTPRVGNGL-- | 135 |
| KAJ6781350.1 | -----                                                       | 0   |
| KAJ6786554.1 | YACTTSSESFKK-----ISQAQVLAAEP-----ADEVDAE--FEVGRGD--         | 129 |

|              |                                                                |     |
|--------------|----------------------------------------------------------------|-----|
| KAJ6785998.1 | -----                                                          | 0   |
| KAJ6779834.1 | -----                                                          | 0   |
| KAJ6783597.1 | -----                                                          | 0   |
| KAJ6789350.1 | -----                                                          | 0   |
| DAA05857.1   | ATAFPFGNGLVTILEGLKEYRQKAVATSGCTGDNNIMLG YFDGAVVGTYAGKALSSATIPS | 194 |
| KAJ6784990.1 | QDQSASTIVSSDIETAAKNLATYLYKH-ASCGSSTLFSKVNNAVVGIFYSGADVQASAAA   | 187 |
| KAJ6787215.1 | GTSEQSFDAKDAISALQQVSRHLQTEEPSCTDNVIKFGYKSAAVGFVGEHHQHGLTK      | 226 |
| KAJ6784672.1 | MNRSNSTLSTTDVASAAARLQSYINKG-SQCGTTILFAKSGSAVVGLHAGSHITKSSVSE   | 194 |
| KAJ6781350.1 | -----                                                          | 0   |

|              |                                                                |     |
|--------------|----------------------------------------------------------------|-----|
| KAJ6786554.1 | --EDGGIAPEVAVSSLTGFLGQYVRQGLAQNGTTMIYGSFSGAAAGLYVGHGLNGGAVSA   | 187 |
|              |                                                                |     |
| KAJ6785998.1 | -----                                                          | 0   |
| KAJ6779834.1 | -----                                                          | 0   |
| KAJ6783597.1 | -----                                                          | 0   |
| KAJ6789350.1 | -----                                                          | 0   |
| DAA05857.1   | I-VDYLLEEDKEQGSAPFGMLAQICDHDS-DMDHTAGVAVALKADIG-SVQSALLSWNQG   | 251 |
| KAJ6784990.1 | M-----LE-RFGTSLSSGPTILQTCNLNSDIGADTTVGVSGLNLQELGGSLHSSVRAWVNG  | 241 |
| KAJ6787215.1 | TVIDEVIKSLEDKG-TSETTGFECHPDRLGADYSAGIILTSAGNLY-KAKDVLATWASG    | 284 |
| KAJ6784672.1 | -----LLDT-FDAQLGQNRLSLEVCGANV-T-SSTFGIAAAEFGSLG-AVQAAVKGWADG   | 245 |
| KAJ6781350.1 | -----                                                          | 0   |
| KAJ6786554.1 | TALQHLEDVSKHANSSQGILGVQMCSDY-DSDHTFGFIATTNGTGFG-AIQDAMLSWYGG   | 245 |
|              |                                                                |     |
| KAJ6785998.1 | -----MGSWSRIFLTTLITPSLGAV--ITSW-----PRSVDAPELPGAGTCRAIVSP      | 45  |
| KAJ6779834.1 | -----MRLFR TALLAL-----LAT-----E-----AAASS                      | 20  |
| KAJ6783597.1 | -----                                                          | 0   |
| KAJ6789350.1 | -----                                                          | 0   |
| DAA05857.1   | ECAKAQSGTTLRELVISQVPLPS-INAKASNISLAEAPGRKAQALDSKVDGKYCKMRTI-   | 309 |
| KAJ6784990.1 | TCVEGSGTASMPHMLSVLVSTTT-----SSNSTPVAANRRGECRDTQV-              | 286 |
| KAJ6787215.1 | ACVSSQN-SWMEVTV--RLPPPAKLETNTTSNSTASSNLQSRQLKTLPRGDCKTTTV-     | 340 |
| KAJ6784672.1 | ECLGDGT-ALPRMDLSVLVSTIDK--NATFY---LNGTLA-SRSLKHLPRGDCRTEQV-    | 296 |
| KAJ6781350.1 | -----                                                          | 0   |
| KAJ6786554.1 | DCVKFGT-SDKVKSKAHFASPLM-----SS---IQGSNSTNSTAHFSKRGE CRTVQV-    | 293 |
|              |                                                                |     |
| KAJ6785998.1 | FDYSAKNRRDDEL PVC SADNLTLDN GISSIGQSELSL FGR-----              | 85  |
| KAJ6779834.1 | FIEQAIA-SGQLKPSNSHPNS-----KSDASL--A-----                       | 47  |
| KAJ6783597.1 | -----                                                          | 0   |
| KAJ6789350.1 | -----                                                          | 0   |
| DAA05857.1   | -----AAGDSCASIAKACKVSV--ADFFKYNGVKG-----                       | 337 |
| KAJ6784990.1 | -----HTGDSGSLATRCGISG--PDFEKYNSGV-----                         | 313 |
| KAJ6787215.1 | -----DKGMCYDLAKCGISS--NDLTKYNPQKNFCSTLVVDQKVCSSGT              | 385 |
| KAJ6784672.1 | -----QEHDSCAAVASRCGISV--DDLQKYNNGA-----                        | 323 |
| KAJ6781350.1 | -----                                                          | 0   |
| KAJ6786554.1 | -----KQGTGCP ELAKMCGISG--PDFTKYNPGK-----                       | 320 |
|              |                                                                |     |
| KAJ6785998.1 | -----QVVGNTDYTCGPDRPCKNKAC                                     | 106 |
| KAJ6779834.1 | -----ATGDS PDYHCRKDKPCALGCC                                    | 68  |
| KAJ6783597.1 | -----                                                          | 0   |
| KAJ6789350.1 | -----                                                          | 0   |
| DAA05857.1   | -----NGNDWCRKLQAGRNICC                                         | 354 |
| KAJ6784990.1 | -----KNLCSTLKDQYVCC                                            | 328 |
| KAJ6787215.1 | LPATIP PAGNGLC KTK EVVAHDT CGSLAAKGLTPQDFSKINTKTGLCSSLAPQNVCC  | 445 |
| KAJ6784672.1 | -----SDWCNKLM PKQH VCC                                         | 338 |
| KAJ6781350.1 | -----                                                          | 0   |
| KAJ6786554.1 | -----TFCNDLMPGQH VCC                                           | 334 |
|              |                                                                |     |
| KAJ6785998.1 | CPKK--TGQCNYGEEACGTSGISPN DVCWSN-----CDA-                      | 138 |
| KAJ6779834.1 | GPLDDEGN GICGMGPKFCG-----KGCTSS-----CDQ-                       | 96  |
| KAJ6783597.1 | -----                                                          | 0   |
| KAJ6789350.1 | ----MPELRPKPNEDGSCATYPVDHNDGCSMI AVARQLTVDDLEEFN-KNTWGWQGCEA-  | 54  |
| DAA05857.1   | SSGS---SKPLPEANGDCFSYTIKAGDDCSSIGMPWNLT PKDIEGFNQV TWGWRGCPN-  | 410 |
| KAJ6784990.1 | SSGTL PDHRPKPGSDGSCNVHKIEKNDGCWAIADKFGITQDDIEKFN-KKTWGWAGCDH-  | 386 |
| KAJ6787215.1 | SYGKL PDRRPKPNADGTCATYTTQPNDDCSVIAAKRDLVAKDIEEFN-KNTWGWKGCEI-  | 503 |
| KAJ6784672.1 | GEGTL PDYRPQPNSDGTCANYQIHDNDTCYVIADGN YLKSDDIEEMN-KSTWGWSGCEH- | 396 |
| KAJ6781350.1 | -----                                                          | 0   |
| KAJ6786554.1 | SAGKL PDYKPKPSKDGSCATVKVEKGLDCSSIGASYGLTKKEIEGFNAKKTWGWNGCDGG  | 394 |
|              |                                                                |     |
| KAJ6785998.1 | -----KSECGKN-----AKV---PGQK CPLNVCCGKW                         | 162 |
| KAJ6779834.1 | -----KSECDAG-----WGMQWSKAGPCPLNVCCSEY                          | 123 |
| KAJ6783597.1 | -----                                                          | 0   |
| KAJ6789350.1 | -----PMPNPVENAECGPTVPGTKPPPA---GISLADLNQCPLKVC CNIW            | 96  |
| DAA05857.1   | -LTVGLKICLSKGSPPMPAPVSNVACGPGQKPGTVRPESVKDAFELAKLNPCLNSCCNVW   | 469 |
| KAJ6784990.1 | -LQPDQLICLSTGRPPFPLPVEGAKCGPMKPGSKPIAG---DDYSKVSFCPLNACCDVW    | 442 |

|              |                                                                  |     |
|--------------|------------------------------------------------------------------|-----|
| KAJ6787215.1 | -VFKDFKMCVSKGDPMPAPVSNVAVCGPTVPGTPQPPK---GTELKTLNECPLKACCNVW     | 559 |
| KAJ6784672.1 | -LQVGQIIICLSKGDPPMPAQVQGTTCGPQVPGTKRPTD---GTALADLNPCPLNACCDVW    | 452 |
| KAJ6781350.1 | -----MPDPIADAVCGPQVAGTKKPID---MSKISELNPCLNACCDVW                 | 41  |
| KAJ6786554.1 | RLWAGTVICVSKGTPPMPSVDPKAVCGPQKSGSKKPKD---MSKISELNPCLNACCDVW      | 451 |
|              |                                                                  |     |
| KAJ6785998.1 | GFCGMTEDYCDAE--DHGA-----TGGCQSNCDQPGPKNK-ASDQLNRVIGYYEAWRH       | 212 |
| KAJ6779834.1 | GFCGTTQDFCNGK--KVTS-----P-----SCSAS-AGSANKRIIGYYEGWNH            | 163 |
| KAJ6783597.1 | -----MDI ISSA-PPK-EFISIGYFEGYGL                                  | 23  |
| KAJ6789350.1 | GHCGFSDDFCTVSKSKSGAPGTAALGINGCVSNCGRIYVGSPSAPE-KPLRIGYFEAWNK     | 155 |
| DAA05857.1   | GQCGIDALFCTKADGPTGNPGTAPAGSNGCISNCGTGI VNNAKPPSGGFRRIGYYEAFNW    | 529 |
| KAJ6784990.1 | GFCGITSDFCTKT PADTGAPGTAKEGTNGCISNCGTDIKKSD-PPS-SLMKVAYYEAWNF    | 500 |
| KAJ6787215.1 | GQCGLTDDFCTYAPSKSGAPG TSA-LQNGCVSSCGRELKKG P-APD-KMKVAYFEAWNG    | 616 |
| KAJ6784672.1 | GFCGTTDEFCTKT PSDTGAPGTAKPGTNGCISNCGRDLVNNDKAPD-EFRRVGYEAFGM     | 511 |
| KAJ6781350.1 | GQCGITDEFCTDT--GTGAPGTAAPNTNGCISNCGTKIVKGS--VS-EFRSIAYYEGFSF     | 96  |
| KAJ6786554.1 | GQCGTTDEFCTDT--GNGAPGTAKKDTNGCISNCGTKIITGN--QK-EIRSIAYFEGYAF     | 506 |
|              | . :.*.*.:                                                        |     |
|              |                                                                  |     |
| KAJ6785998.1 | DSKCQDMGLDDIPVNSLTHLYFSFAFITPGEYNIVGMNGLPNRFLTDFTSLKNNPGLKT      | 272 |
| KAJ6779834.1 | QRSCDTMKPSEIPLGYTHINFALIHPTQFTIDAMDDKTGSLYREVTLGKSKDPGLKV        | 223 |
| KAJ6783597.1 | TQPCDRVDVRTIDVKKYTHIQFAFSTVTANTFEVDMGPTL--NQFYFFKQLN----GVKR     | 77  |
| KAJ6789350.1 | NRNCLTMDNH-----                                                  | 165 |
| DAA05857.1   | ERPLHMESKLSNTDKYTHMHWAFFGDIKSD-FSVYINDTH--HQWDGFMGLK----NVKR     | 582 |
| KAJ6784990.1 | DRSCLHMNVDAIKG-DYTHIHFAFATVDKN-WGVSLDKN-TQKQFNRFKSVK----GPKK     | 553 |
| KAJ6787215.1 | NRPCLHMDVTDIDTSLYTHIHFAFAEVTRD-YNVDISKVQ--KQFDKFKSMT----GIKK     | 669 |
| KAJ6784672.1 | NRPCMMNGVKEIDVNHYSIHFAFATVTAS-FQVDISDSK--EQFGDFVQMK----NIKK      | 564 |
| KAJ6781350.1 | SRKCLYQDALQIDGSQYTHLHFGFGDISPD-FQISIGDEMATYEFNNFRFIR----GPKK     | 151 |
| KAJ6786554.1 | NRKCQYQDAFQIDPKKYTHLHFGFGTISKD-LKPSIDDYATNYEFNNFRMIS----GPKR     | 561 |
|              | *                                                                |     |
|              |                                                                  |     |
| KAJ6785998.1 | IIAVGGWTHNDPGPLQKVFSTMTVKETRAKFIKNLSFLRLNAFDGVDFDWEYYPGADDR      | 332 |
| KAJ6779834.1 | WIAIGGWAFNDPGPTQSTFSLVSKAPAAQELFFNSLITFLINNNDGVDIDWEYYPADDR      | 283 |
| KAJ6783597.1 | ILSFGGWTFSTDPATYGI FRTG-VTPEHRQTMANNIAKFIIDQGLDGVDIDWEYYPAPDI    | 136 |
| KAJ6789350.1 | -----ELDGIDIDWEYYPGSY--                                          | 180 |
| DAA05857.1   | IVSFGGWGFSTGVASYDVL RKA-MTPENRGHFVSNVVAFAKKMGIDGIDLDWEYYPGAPDI   | 641 |
| KAJ6784990.1 | ILSFGGWAFSTEPDTYQRF RDA-TKAENREKFATNVVKFLNDNSLDGLDFDWEYYPGAPDI   | 612 |
| KAJ6787215.1 | II SFGGWDFSALPGTFDILREA-VK PANRNVFKQNVVKFVKDNGLDGVDLDWEYYPGAPDI  | 728 |
| KAJ6784672.1 | II SFGGWDFSTKPE TFQRFRDA-TK PENRDAFIASLVDFASKNAIDGLDFDWEYYPGAPDI | 623 |
| KAJ6781350.1 | II SFGGWEFSNAPSTYDIFRRG-VQDGNREILAKNIAKFVNDNGLDGVDIDWEYYPGATDI   | 210 |
| KAJ6786554.1 | ILSFGGWDFSTGPDYTI FREG-TK KENRETLATNLAKFVEKYQLDGIDIDWEYYPAPDI    | 620 |
|              | :**.*:*****.:                                                    |     |
|              |                                                                  |     |
| KAJ6785998.1 | GGVP-----EDGVNFTQFLKELDDENNKP KKYIVSFTAPT SYWYLRHFDLKAIE-HVDY    | 386 |
| KAJ6779834.1 | GGKP-----EDFKNFVSFI AKLRARLNASGKDFGLSLTL PSSYWYMQHFDIIALEPYVDW   | 338 |
| KAJ6783597.1 | PGIPAAD-PAEGANYLKFMIALRGV---LPKDKSLSFAAPASSWYLGFPFIAIITKIVDY     | 192 |
| KAJ6789350.1 | -----LSASKSVSFAIPASYWYLKAFPIAMMSKRFDY                            | 212 |
| DAA05857.1   | PGIPKGL-PSDGP NYLET LRALRKA---LPSKYSLSIAVPASYWYLRPFPIREMSETVDY   | 697 |
| KAJ6784990.1 | PNVPPGS-TDEGSNYLAFLKVLK G---LDKSKSISIALPSSFWYLQAYPVKELNSVVDY     | 668 |
| KAJ6787215.1 | PDIPSD- PHNGVNYMFLKQLKSA---LG-DKSVSFAAPSSYWYMRSPV DLMARDIDY      | 783 |
| KAJ6784672.1 | PDIPPGD-KGEGDNYLEFLKDLKAK---LPSDKSVSIALPASYWYLKQYPVKKMADIVDY     | 679 |
| KAJ6781350.1 | PGTPAGDPKTEGINYLKFLVLKEM---LP-NKSVSIAAPASYWYLNFPKIRISQIVDY       | 266 |
| KAJ6786554.1 | PGVPPGD-KSEGKNYLEFLKLLKSK---LK-GKSVSIAAPASYWYLGFPFIKDIGKVVDY     | 675 |
|              | :*::*:* **:: : : : .*:                                           |     |
|              |                                                                  |     |
| KAJ6785998.1 | VNVMSYDLHGVDSSNP-----IGSHIYGHTNLTEMKLA FDLFWRNDVPANKLNMGLG       | 439 |
| KAJ6779834.1 | FNMMTYDIHGTWDGTTIPS-----LGPRVQAHTNLTEIELAMELLWRNNINPERVTMGLG     | 392 |
| KAJ6783597.1 | VVYMTYDLHGQWDYGNKWSSPGCPGNSCLRSHVNM TETINALSMITKAGAPSNKIAVGLT    | 252 |
| KAJ6789350.1 | IVFMT-----DALAMITKAGVPANKIALEIA                                  | 238 |
| DAA05857.1   | IVY MAYDLHG-----NGNCLRSHVNQTEVVLALSMITKAGVSASKVVVGES             | 743 |
| KAJ6784990.1 | FIYMTYDLHGQWDYDNKFTTPGCANGNCIRSHVNITETK TSLAMVTKAGLSSNKVVVGVS    | 728 |
| KAJ6787215.1 | II FMTYDLHGQWDYGNKWTSPGCDTGNCLRSHVNDTETKDSLIMITKAGVPTNKVVVGVA    | 843 |
| KAJ6784672.1 | FIYMTYDLHGQWDVG NKYATPDCATGNCLRSHINKTETMDSLILITKAGVESRKIVVGIS    | 739 |
| KAJ6781350.1 | II YMTYDLHGQWDAGNPNAQPGCS DGMCLRSQVNL TETMSSLSMITKAGVNSGKVVGVT   | 326 |
| KAJ6786554.1 | II FMTYDLHGQWDADNKNSQIGCPGGNCLRSHVNL TETRNSLSMITKAGVDSGKVVGVT    | 735 |
|              | . *:                                                             |     |
|              |                                                                  |     |
| KAJ6785998.1 | FYGRAFQLADSSCDKPGCLFKGG----ATKGACSGESGILSYREIREILDKNK---MTF      | 491 |
| KAJ6779834.1 | FYGRSFTLKDP SCTAPGCPFGSP----GKPGECTGTGGVLSAGEINRAIKKGG---K-M     | 443 |

|              |                                                                |      |
|--------------|----------------------------------------------------------------|------|
| KAJ6783597.1 | SYGRSFKMLTSGCTGPMCTFAGP--QSQAQPGRCCTGTAGYISQNEIDYVLRNNP--SAQK  | 308  |
| KAJ6789350.1 | TYGRSFKMAAGCWCWGPMLFTGTNRISNAEGRCTKTAGYISNAEIQEI IQYGN--VNKQ   | 296  |
| DAA05857.1   | SYGRSFKMAKAGCTGPLCKFTGANGKSEAAAGRCTNARGYLANAEINEIISKSK-GHPKT   | 802  |
| KAJ6784990.1 | SYGRSFERLKLPGCFTPDCLFTGSPTQSDAFQGRCTNTSGYISNAELKEIADKKKYSYVKS  | 788  |
| KAJ6787215.1 | SYGRSFKMEKAGCDGPMCKFTGSARVSNAAHGRCTDTGGYISNAEIAEIIDSGK--VTRQ   | 901  |
| KAJ6784672.1 | SYGRSFRMSDPSCSGPMCTYTGTDRHSEAYQGRCTGTSGYISNAEMQEI IQDHNHYGTINN | 799  |
| KAJ6781350.1 | SYGRSFAMAEAGCHGAQCKYTGSRQLQSNAAKGECTDTSGYISNAEIGKILADPS-RVNEH  | 385  |
| KAJ6786554.1 | AYGRSFAMSDGSGCHGPDCTFTGTRLHSNANKGECTDTAGYISNAEIKKIAKDKK-RVVKS  | 794  |
|              | ***:* : . * * : * . * *: * :: * :                              |      |
| KAJ6785998.1 | VHDKEAGVKYLYNN--DQWVSFD                                        | 548  |
| KAJ6779834.1 | VLDKPSAAQIVTFGG--DQWVSFD                                       | 499  |
| KAJ6783597.1 | THDAESNSDILVDDT--TEWVSYM                                       | 364  |
| KAJ6789350.1 | WEA--VGSHVLVYND--TEWVAYM                                       | 350  |
| DAA05857.1   | WYDKDTASDYLVDYND--VEWVAYM                                      | 858  |
| KAJ6784990.1 | WYDKDSDSNIMVYGDGPKHDWVAYM                                      | 847  |
| KAJ6787215.1 | WKA--AGSDILVYSG--TEWVAYM                                       | 955  |
| KAJ6784672.1 | YYDSSSDSLILEYGDGNAVDWVAYM                                      | 858  |
| KAJ6781350.1 | YIDAGSNSNVLYDN--TEWVAYM                                        | 441  |
| KAJ6786554.1 | YMDSTSNSNVLYDN--NQWVAYM                                        | 850  |
|              | : . :*: : : . . : * ** .                                       |      |
| KAJ6785998.1 | QAVLDPKPLGDFKSIDKGGDNNWTGTNEKCYVTAC-GEGCKAGEIKITDEYCAKKKVSTLC  | 607  |
| KAJ6779834.1 | -ALFGNTGHKKRKTTRDPKD---NDYNLKCFAAGGI-NGG-----                  | 532  |
| KAJ6783597.1 | -----PDPSTIDANGPSLLADGLTDLKLHSSCLPYREIOWTA-----WD              | 402  |
| KAJ6789350.1 | -----TGMDQQLDESFI-----EIRCDGQYTTFDAVE-----                     | 377  |
| DAA05857.1   | -----HTEPPQGGPGAN-----ETGCINVFNDNMIWDWNPSIEAAIG                | 895  |
| KAJ6784990.1 | -----GGSPDDPTNDPS-----KLTCKDAKMSYKKQDI-SPIYFPTY                | 883  |
| KAJ6787215.1 | -----DGDDDDDG-MHGSAD--YFGECTGSYDSLESLEKAKDSIPDY                | 995  |
| KAJ6784672.1 | -----GGDDS-DMPDIDMSDG--DNINCPADMAPGSLEDLSNANNLPMR              | 899  |
| KAJ6781350.1 | -----DGVKDWANFRLQIKAG--NN-----PLTHAGDRGTGNWTKLT                | 475  |
| KAJ6786554.1 | -----KGFDPDWGAFTVSLKSR--KD-----PYEDVGKRSGNWTRLD                | 884  |
| KAJ6785998.1 | CPLSGAPDPKDCTWRGGTTRWCNCRCHDDEVMTMSKYGGGHDCWDGQIAHCKKSALGEY    | 667  |
| KAJ6779834.1 | -----                                                          | 532  |
| KAJ6783597.1 | -----DAG-----TIAKAPYNWSRFNK-YQKVL----                          | 424  |
| KAJ6789350.1 | -----RA-----LQA-----M----HDA--LDR-YKKLVDGGY                    | 398  |
| DAA05857.1   | CTNILQPSPLSTTVTL-TAYT-----TLT-----LQSGTKLSTSVVSA-PFSISEVSY     | 941  |
| KAJ6784990.1 | GDAL-----TT-----YVV-----IVNLTPHKFKI-----TSTSHY                 | 909  |
| KAJ6787215.1 | CVDQ-----YA-----TQV-----QQAMLRDAIKRYD----DLVNGDY               | 1024 |
| KAJ6784672.1 | CQAL-----YA-----LDI-----LYNTLEDSLFLD-----TNSQDY                | 927  |
| KAJ6781350.1 | CDDK-----YW-----TEK-----LDYTPAERWAGLD----AK----                | 499  |
| KAJ6786554.1 | CTAD-----GA-----TDT-----LHYTSDERWENLD-----AA----               | 908  |
| KAJ6785998.1 | NVC-KWRGVGEKCHAGELPMTFSGTVLNILEDIAKVILRVVGRAYPLTALTGELLKVLVD   | 726  |
| KAJ6779834.1 | -----                                                          | 532  |
| KAJ6783597.1 | -----NN-----YLGKKSQGVPIITD---AIWKNFERHSEIHGHPREGLR IYL-        | 465  |
| KAJ6789350.1 | DDKF--NY-----YSNYIKMLVPMQIDE-----FMASGKADD-----YF-             | 430  |
| DAA05857.1   | QPFI--ID-----YPDLLSKS-DGQM-----ITYNTPQIT-PD----PITI-           | 975  |
| KAJ6784990.1 | QYDIDFKDV-----YPGSMQGA-----FSRGNGGSPVDDHA----EIYY-             | 945  |
| KAJ6787215.1 | NHYF--DV-----YAGYVKSQVPSQIED-----FMGSKDAQK-----YF-             | 1056 |
| KAJ6784672.1 | DDKF--GY-----YEQWVKDGDIDSRIDK----FLNFRDDVK-DAPG----IDFF-       | 965  |
| KAJ6781350.1 | -----DAW-----TDIIND----WKQYRKERP----N----SA----                | 520  |
| KAJ6786554.1 | -----NAW-----KDMVAD----WKRYRAKTS----G----VN----                | 929  |
| KAJ6785998.1 | ELHLDTKKLYCCPEEELKKWKNCWAYGKPGNC-----FDGHCPDMKTVQITDSYFG       | 777  |
| KAJ6779834.1 | -----                                                          | 532  |
| KAJ6783597.1 | -NIY-----CDQY-----ALPRKFT-----EKPKEERCNKLNRD--                 | 493  |
| KAJ6789350.1 | -TCQGTMYGYHC-----SDCQWG--GCLDSRRAEDCKSGMYTEKVKCPDTLKY--        | 476  |
| DAA05857.1   | -RIPDG-----WTVTGGHLASPGSGPGSSSGPSSKPAKATSTTSD--                | 1014 |
| KAJ6784990.1 | -DVEGTDKK-----FVIRL-----TNND--                                 | 962  |
| KAJ6787215.1 | -KCTETGKPNCC-----GSCRYFCEEDDVKNCDRTPGCDS-----NKSGETRID--       | 1099 |
| KAJ6784672.1 | -DCKYT-----WGTK-----EGT--                                      | 977  |
| KAJ6781350.1 | -----                                                          | 520  |
| KAJ6786554.1 | -----                                                          | 929  |

|              |                                                               |      |
|--------------|---------------------------------------------------------------|------|
| KAJ6785998.1 | GGETCGGQLSRVRTFCESDGE-----PLFLPVPLTNLFEHPPDGGVDTDFTLKTDKS     | 830  |
| KAJ6779834.1 | -----                                                         | 532  |
| KAJ6783597.1 | -DVVAA--TYRFPGTWF-----WSEYYILLCPAFLGKI---PKYQ-----FTDLKDL-    | 534  |
| KAJ6789350.1 | ----RE--SGVLPPEHYRL-----MSADYHL-----                          | 495  |
| DAA05857.1   | ----DG--AGYLLPITFYP-----TLSYRI--PSILTPK---PPAP-----T-KLPD--   | 1049 |
| KAJ6784990.1 | ----KG--TGTFERVICDLRGIGIGSRELN--PGQ-----VP-----L-VITG--       | 997  |
| KAJ6787215.1 | ----CP--TDVVQHEFLDSSRL--HNATFNL-----                          | 1122 |
| KAJ6784672.1 | ----TS--CAGMPHFWDYNDRS--WTVEFIL-----                          | 1000 |
| KAJ6781350.1 | ----KE--TGAFSQFISYLI-----                                     | 535  |
| KAJ6786554.1 | ----TG--TALFSEFFANNFN-----                                    | 944  |
| KAJ6785998.1 | SDHGSDSDPNDAAFQFVVLVSPESLQVSLDKRDGSHWDVFECNDSVSEGEHTVRMVCNDHT | 890  |
| KAJ6779834.1 | -----                                                         | 532  |
| KAJ6783597.1 | KKEADSYP---LLQTE-INR-W--SGTKRGVTMYEVA-----                    | 565  |
| KAJ6789350.1 | ---DDIEG---FW-----KE-W--AKNTASMSHGWPLM-----                   | 519  |
| DAA05857.1   | ---NDEHP---IN-----TP-S--SSTSSGRPGDGGQS-----                   | 1073 |
| KAJ6784990.1 | ---SKRAG---FR-----SS---L-LVDGKVAGWMQS-----                    | 1019 |
| KAJ6787215.1 | ---KDHDG---FF-----KA---IGDKYGIDEEWQF-----                     | 1145 |
| KAJ6784672.1 | ---KDEKG---FY-----DA---LAAQTGIDKDWITF-----                    | 1023 |
| KAJ6781350.1 | -----NPDPHCEDILT-----                                         | 547  |
| KAJ6786554.1 | -----HTQPIDCGDITV-----                                        | 956  |
| KAJ6785998.1 | ADSNCHKIGLGHGVPGTILQMPKCGCGPKYAVAKS-----MAPAPGK-DHVKLL-PRHLS  | 943  |
| KAJ6779834.1 | -----                                                         | 532  |
| KAJ6783597.1 | -----HLQDVS-----NNPTCDNNE-----LYDPRRI-                        | 587  |
| KAJ6789350.1 | -----IDCARKSDFYFHHYP--KVKDDMKVVPNPKDV-                        | 548  |
| DAA05857.1   | -SGTPRPPSNGQNPSST-P-KPPGDGPDPIINTQK---PPGDGPDPIINT---QKPPGDG- | 1122 |
| KAJ6784990.1 | -IKDTIKD-----RRIKDVVLPGTHDSAMSKISHKL-                         | 1049 |
| KAJ6787215.1 | -SRKTMHVSNGCQYAGT-----HVKECQDKQDSHYNFPL-ANNDKIHFVNPKDM-       | 1193 |
| KAJ6784672.1 | --GTKEEPYVCADPSGDAP-LRPGGAATPCHRLT-HTLKNYPTKIDDKDIHVGNPKKF-   | 1078 |
| KAJ6781350.1 | -GNCRNTFDCKSFKGDK-----SGPAAAL-                                | 571  |
| KAJ6786554.1 | -SSNCRSAVTCDDFTGER-----TGPAAAL-                               | 980  |
| KAJ6785998.1 | HLAGLEPVVYELTFDYDFHRVPRDL---GDTQMRIDFSNQEDYWKNI VAGSV---NRKR  | 996  |
| KAJ6779834.1 | -----                                                         | 532  |
| KAJ6783597.1 | ----VLKAQGGYDRDYEFHLANAHSWTLSALGMWM-----MKTFNLSDPPMPRGTQIQ    | 636  |
| KAJ6789350.1 | ----IGKSYNEALDLLKYFKI-----ARSAII-----YDSLAAEDLLDAISVSFAF      | 589  |
| DAA05857.1   | ----PDPSNAHNT-----PASTKRPG-----DNQH-----PTPTPAPIR             | 1152 |
| KAJ6784990.1 | ----ITAADSPNTQTQ---GMS---IYN-----QLRLG---ARWF-----DLRVI       | 1081 |
| KAJ6787215.1 | ----IDKGYKNMTTTRDDL DL---LLAA---SQYQIG---MAW---DDAADGTDIPAM   | 1235 |
| KAJ6784672.1 | ----IEASMTNITALQDSL LS---SYAAVGLGVYSEG-----KTDVSEIDPVTAYAMPVL | 1126 |
| KAJ6781350.1 | ----IWN SLVKVSSTY---A---NHLL-PLL-----PLL-----PLLP-----        | 598  |
| KAJ6786554.1 | ----IWN SFVQINEMY---A---SYAD-ALG-----NAAAEKIDPSLD-----        | 1012 |
| KAJ6785998.1 | DVNGRKRLAKRTLEDVGGNPVRWLEEEFRDDFHFDKIASRELQERWFGK-----SILEW   | 1050 |
| KAJ6779834.1 | -----                                                         | 532  |
| KAJ6783597.1 | QRDGDGSGDETGN DIV-----DQN-DDFDPSQID--PTEFFWMSRLGYVPNRLHLY     | 685  |
| KAJ6789350.1 | TYQSAVEK---MDAIV-----KEV-KTIKKN--D--LKE-----FILDF             | 620  |
| DAA05857.1   | D---IDC---KDDSC-----TRG-RDCESD-----D-----CL---                | 1173 |
| KAJ6784990.1 | SVHGTAGM---EGDYE-----                                         | 1094 |
| KAJ6787215.1 | SVVSAVDN---MKEIR-----DKG-KEIEKK--E--REQ-----FILNM             | 1266 |
| KAJ6784672.1 | QLQQSIDS---MRDIK-----DIG-EKAKEE--K--KKQ-----LIMTI             | 1157 |
| KAJ6781350.1 | -----L-LPLLL--L--PLH-----LLTL-                                | 613  |
| KAJ6786554.1 | -----DFQ-----NTF-APTPE--K--DNE-----WLTI L                     | 1033 |
| KAJ6785998.1 | --LAALVKPEIRREFT---YKYDSDVTAKLFDESWDPCGSVE---GVNYDGHLLAQAVL   | 1101 |
| KAJ6779834.1 | -----                                                         | 532  |
| KAJ6783597.1 | VTLVVLVIPPFPVKYICAHDYGVNTAVVIAK-----RA---NMNIKANAKHIVVW       | 732  |
| KAJ6789350.1 | ITGVIMLVP-GIGEAL-GPEMA-----ATRS-----FLRLLGDVGDA-GTLIYGVED---  | 665  |
| DAA05857.1   | -----RG-GDCEG---ENCVEGGKCRGKRCISGGNCK-G-----                  | 1202 |
| KAJ6784990.1 | -----FYG---AHVND EK---MSACIGNTG---QSLDDIISDINQF               | 1126 |
| KAJ6787215.1 | VLGILFFIP-FVGEAA-GAAGL--TAV--RT---LCRLIGDLGDI-GMTIYGIVEN---   | 1312 |
| KAJ6784672.1 | LTVVFVMLP-FVGEAL-GPIVG---AASSIAR---IALIISEAGNA-AISIKDIVDD---  | 1205 |

|              |                                                                |      |
|--------------|----------------------------------------------------------------|------|
| KAJ6781350.1 | -HLLTLH-----L-LPLLS--ASCLALL--LRFFVHSSLTEPSS-----H----         | 647  |
| KAJ6786554.1 | LDLVSMG----TSMVA-GPFFVG---KVI-GK---LPYFVSKIEDAGANALKDKIAS----  | 1077 |
|              |                                                                |      |
| KAJ6785998.1 | DI-----EVETSFGFTLIVESLTLPLNLDKSYLTF-----YN                     | 1133 |
| KAJ6779834.1 | -----                                                          | 532  |
| KAJ6783597.1 | VL-VPQQVVLf-----                                               | 742  |
| KAJ6789350.1 | ----PSSGLMRG-----FGAFAAVGLSRSGI-LK----A----SESRRGMS            | 698  |
| DAA05857.1   | ----PK-----CKTGGPCEGENCEKGGG-CAKTLFGDCGSGGCQGARCFS             | 1242 |
| KAJ6784990.1 | TSENPGEVIFFRRLRYMVGIRKVPISLGPiHWGGDDWSNL--YDD--FLGRMQKVHNRCLN  | 1181 |
| KAJ6787215.1 | ----PSDAF-----GAIFGALLGRALD-----HV-----QLG                     | 1335 |
| KAJ6784672.1 | ----PTSA-----PFAMLGFIVGAAGAGAGG--S-----RLT                     | 1231 |
| KAJ6781350.1 | ----RPPLI-----VLNCADDYATA--EDG--KVLYT-----                     | 671  |
| KAJ6786554.1 | ----TSSTILTT-----AITIGSGFIDGSTDDWDPE--AED--HFKNTMSLAMTGWN      | 1121 |
|              |                                                                |      |
| KAJ6785998.1 | KGRVTGVVTLEALARVT-YEKKKVILNLP-----FPGASFKIPGIATIGPQLTVEGSIDA   | 1187 |
| KAJ6779834.1 | -----                                                          | 532  |
| KAJ6783597.1 | -----                                                          | 742  |
| KAJ6789350.1 | DTEIESGE-----VSGDGSRAVLIDPTSCIPASGI-----                       | 728  |
| DAA05857.1   | KRDCFGAQ-----CERLTIKPLPKDPKSTPATPPKPT-----                     | 1275 |
| KAJ6784990.1 | IDGDFGAKKMGTfMDMNEKGKCVIFLLSPTD--FSGNPYR--PQY-----             | 1222 |
| KAJ6787215.1 | KAAKSGRE-----LKRKGID-----D-----                                | 1351 |
| KAJ6784672.1 | KVETLGDA-----AAVRGA-----                                       | 1245 |
| KAJ6781350.1 | -----                                                          | 671  |
| KAJ6786554.1 | KIATFGLR-----DLFNGSD-----SSLN--TLS-----                        | 1143 |
|              |                                                                |      |
| KAJ6785998.1 | SLGMAGLVETKLEIAKWEVRQVMPSTDDYKPELIDNSSPS--LDRT-----GDFSGIQKP   | 1240 |
| KAJ6779834.1 | -----                                                          | 532  |
| KAJ6783597.1 | -----                                                          | 742  |
| KAJ6789350.1 | -----S-----DPRIAIHI-----NKYIRILSITPDNIF-----P                  | 753  |
| DAA05857.1   | ----CLVD-----CPKLPECPDWDPLCHDPCFFSAC-----P                     | 1303 |
| KAJ6784990.1 | ----GLYD-----AGKLVITDDWADTES-----TKDMVNRETKDQDP                | 1256 |
| KAJ6787215.1 | -----LKGIKENVMKLNN-----                                        | 1364 |
| KAJ6784672.1 | -----LK-AEDLA-----KFPARFRELDQSQQKIVKKF---                      | 1272 |
| KAJ6781350.1 | -----                                                          | 671  |
| KAJ6786554.1 | ----DLLS-----GGKFAAGKDYGKGSYDQASSKEANKTLEDNLSKTFYAYAIP         | 1188 |
|              |                                                                |      |
| KAJ6785998.1 | EFYAGVTASGDVTLRLGAAAEF-----GVRFDDKWKVDPAAAAVVEVSLTTKF          | 1289 |
| KAJ6779834.1 | -----                                                          | 532  |
| KAJ6783597.1 | -----                                                          | 742  |
| KAJ6789350.1 | V-----                                                         | 754  |
| DAA05857.1   | VYRRPTG-KACTTLQTARDCTEFVSSTRVKTKPTTSWSTTTRTLCEt-----           | 1349 |
| KAJ6784990.1 | RKFINIH-IAQWLL-----TS-QGIDAVSWDNYYEAMQVN-----                  | 1289 |
| KAJ6787215.1 | -----IRGARMCKL-----                                            | 1373 |
| KAJ6784672.1 | -----EGKACHL-----                                              | 1279 |
| KAJ6781350.1 | -----                                                          | 671  |
| KAJ6786554.1 | AIWHASG-HRPFIIDTGLSCDKGKA-ED-VKLKGACWKDTWYRLASP-----           | 1232 |
|              |                                                                |      |
| KAJ6785998.1 | AAGSSTTGTCPFfTYGLDVGARLFARAIAPQVFGWGGGEVDLTAKWEKSIIEGGTCPD LGP | 1349 |
| KAJ6779834.1 | -----                                                          | 532  |
| KAJ6783597.1 | -----                                                          | 742  |
| KAJ6789350.1 | -----                                                          | 754  |
| DAA05857.1   | -----MVDCEA-----ADITAT-----TTITTTHTPDp                         | 1372 |
| KAJ6784990.1 | -----PLIYS-----HGvN-----                                       | 1298 |
| KAJ6787215.1 | -----                                                          | 1373 |
| KAJ6784672.1 | -----                                                          | 1279 |
| KAJ6781350.1 | -----                                                          | 671  |
| KAJ6786554.1 | -----DGGYQECaK-----NGCDHVPNP                                   | 1250 |
|              |                                                                |      |
| KAJ6785998.1 | IPSKRSLQSLDPPSIDGLSEDRHVTRNKSRLGGADLG-----SYSASDVQSMHS----     | 1398 |
| KAJ6779834.1 | -----                                                          | 532  |
| KAJ6783597.1 | -----                                                          | 742  |
| KAJ6789350.1 | -----                                                          | 754  |
| DAA05857.1   | IESV-----GPAVPYYGVSWSFGEKEKS-----SMLADEEAYFSALETpMTTTTTT       | 1418 |

|              |                                                               |      |
|--------------|---------------------------------------------------------------|------|
| KAJ6784990.1 | --EMSPTAWPGVLMVDYLGETWYAGHDFAD-TGAELATLAVGLNQY-----MLSENC     | 1348 |
| KAJ6787215.1 | -----                                                         | 1373 |
| KAJ6784672.1 | -----                                                         | 1279 |
| KAJ6781350.1 | -----                                                         | 671  |
| KAJ6786554.1 | CVECDDQFKTPSGVDKLGSDYFSQVSVHD-LIV--GYVRTGTPNFFSTTTSRKLTAKCR   | 1307 |
| KAJ6785998.1 | -----SEEHTSSPAKRGSLVKRGGVYGPAPFSLPVGEFFCPSK-DGEKGMTC          | 1443 |
| KAJ6779834.1 | -----                                                         | 532  |
| KAJ6783597.1 | -----                                                         | 742  |
| KAJ6789350.1 | -----                                                         | 754  |
| DAA05857.1   | SAEPSTTDDTPTETTADGPTSTVGPNDLVCGFALYAAFYRFDIVKM-VGDWVWDEGHK-   | 1476 |
| KAJ6784990.1 | LSSI-----YPPLLDYPEGYKDKSANKAN--NK-                            | 1374 |
| KAJ6787215.1 | -----                                                         | 1373 |
| KAJ6784672.1 | -----                                                         | 1279 |
| KAJ6781350.1 | -----                                                         | 671  |
| KAJ6786554.1 | SVRTWLDNDKENGGSANPNPDTLKSLLQDDVTPGFIRMPVCTADRARIAGWASSDS-     | 1366 |
| KAJ6785998.1 | VQAYDALAESNEGGVWQNMKRKDTLVPTSTIDEN---AVAAHFHDH-----           | 1486 |
| KAJ6779834.1 | -----                                                         | 532  |
| KAJ6783597.1 | -----                                                         | 742  |
| KAJ6789350.1 | -----                                                         | 754  |
| DAA05857.1   | LKKELKGCALTGWKYYRR-----DDG-----SREA                           | 1502 |
| KAJ6784990.1 | IA--GADEEQWNGFIFANGTVIDHP---SPDV-----GVYNGPHKD                | 1410 |
| KAJ6787215.1 | -----                                                         | 1373 |
| KAJ6784672.1 | -----                                                         | 1279 |
| KAJ6781350.1 | -----                                                         | 671  |
| KAJ6786554.1 | AK--NYPCNANAGYDYCGDSTIENQTSASPVEDCKEMIRLEDGRLPKRWPHVGPLEK     | 1424 |
| KAJ6785998.1 | -QRSHGYR---RHVRGEELHELE-KRAKEKLIKACERTCDIS-----ADFPGGQ        | 1531 |
| KAJ6779834.1 | -----                                                         | 532  |
| KAJ6783597.1 | -----                                                         | 742  |
| KAJ6789350.1 | -----                                                         | 754  |
| DAA05857.1   | -----RFNLPVFLTAGCVESAIKSAGGPGLS-----CIFA                      | 1532 |
| KAJ6784990.1 | -DAIITYYS-----                                                | 1418 |
| KAJ6787215.1 | -----                                                         | 1373 |
| KAJ6784672.1 | -----                                                         | 1279 |
| KAJ6781350.1 | -----                                                         | 671  |
| KAJ6786554.1 | QQAIATYESCKFGVTGKGIHGNVDFKVGAQDVIDLVRDSIDKFGGGKVGSKGTMSCKGN   | 1484 |
| KAJ6785998.1 | LKGKEWGWATKDCGDFNFGSPLLAREPNTDYHTEHVLEAQMIDLFFQYLNKKKKPQDPK   | 1591 |
| KAJ6779834.1 | -----                                                         | 532  |
| KAJ6783597.1 | -----                                                         | 742  |
| KAJ6789350.1 | -----                                                         | 754  |
| DAA05857.1   | T-----                                                        | 1533 |
| KAJ6784990.1 | -----                                                         | 1418 |
| KAJ6787215.1 | -----                                                         | 1373 |
| KAJ6784672.1 | -----                                                         | 1279 |
| KAJ6781350.1 | -----                                                         | 671  |
| KAJ6786554.1 | IKGQKVNWGLY-----                                              | 1495 |
| KAJ6785998.1 | PGAAKGDTVSFCDYVNVLWDVPAPFVWPQDMDGGIGKKWDPIMHIAAQFPTKTFNKQEFV  | 1651 |
| KAJ6779834.1 | -----                                                         | 532  |
| KAJ6783597.1 | -----                                                         | 742  |
| KAJ6789350.1 | -----                                                         | 754  |
| DAA05857.1   | -----                                                         | 1533 |
| KAJ6784990.1 | -----                                                         | 1418 |
| KAJ6787215.1 | -----                                                         | 1373 |
| KAJ6784672.1 | -----                                                         | 1279 |
| KAJ6781350.1 | -----                                                         | 671  |
| KAJ6786554.1 | -----                                                         | 1495 |
| KAJ6785998.1 | ALESPINTPSKTRAWASGNPWDSKGWTNDIADYAKSRIILQKLRSTMGSRITYQSDSTISQ | 1711 |
| KAJ6779834.1 | -----                                                         | 532  |



|              |                                                               |      |
|--------------|---------------------------------------------------------------|------|
| KAJ6783597.1 | -----                                                         | 742  |
| KAJ6789350.1 | -----                                                         | 754  |
| DAA05857.1   | -----                                                         | 1533 |
| KAJ6784990.1 | -----                                                         | 1418 |
| KAJ6787215.1 | -----                                                         | 1373 |
| KAJ6784672.1 | -----                                                         | 1279 |
| KAJ6781350.1 | -----                                                         | 671  |
| KAJ6786554.1 | -----                                                         | 1495 |
|              |                                                               |      |
| KAJ6785998.1 | TMKTQTDRIGVVLDALDTLLKANTPAGYTAWEKQDLKDEWHKYMKGQYTTMQSKTRGLV   | 1771 |
| KAJ6779834.1 | -----                                                         | 532  |
| KAJ6783597.1 | -----                                                         | 742  |
| KAJ6789350.1 | -----                                                         | 754  |
| DAA05857.1   | -----                                                         | 1533 |
| KAJ6784990.1 | -----                                                         | 1418 |
| KAJ6787215.1 | -----                                                         | 1373 |
| KAJ6784672.1 | -----                                                         | 1279 |
| KAJ6781350.1 | -----                                                         | 671  |
| KAJ6786554.1 | -----                                                         | 1495 |
|              |                                                               |      |
| KAJ6785998.1 | NDWLPLKLLKAWCSQAEKDKWEAKPTDSGTLKTEKEEHRAFIKAIEDFDTKWNGLAVWNNP | 1831 |
| KAJ6779834.1 | -----                                                         | 532  |
| KAJ6783597.1 | -----                                                         | 742  |
| KAJ6789350.1 | -----                                                         | 754  |
| DAA05857.1   | -----                                                         | 1533 |
| KAJ6784990.1 | -----                                                         | 1418 |
| KAJ6787215.1 | -----                                                         | 1373 |
| KAJ6784672.1 | -----                                                         | 1279 |
| KAJ6781350.1 | -----                                                         | 671  |
| KAJ6786554.1 | -----                                                         | 1495 |
|              |                                                               |      |
| KAJ6785998.1 | L 1832                                                        |      |
| KAJ6779834.1 | - 532                                                         |      |
| KAJ6783597.1 | - 742                                                         |      |
| KAJ6789350.1 | - 754                                                         |      |
| DAA05857.1   | - 1533                                                        |      |
| KAJ6784990.1 | - 1418                                                        |      |
| KAJ6787215.1 | - 1373                                                        |      |
| KAJ6784672.1 | - 1279                                                        |      |
| KAJ6781350.1 | - 671                                                         |      |
| KAJ6786554.1 | - 1495                                                        |      |

**Fig. S1. Clustal alignment of *A. album* GH18 chitinases.** The alignment of the 26 *A. album* sequences and the three *H. jecorina* sequences (DAA05865, DAA05854, DAA05857) was subdivided for the subgroups A, B and C (see Figure 1) in order to better indicate the specificities of the three subgroups. Boxed sequences correspond to the conserved motif DXXDXDXE, typical of GH18 sequences. Yellow highlighted C's (in the B sequences) correspond to C residues 46, 93, 185 and 214 in hevamine (P23472), a lysozyme/chitinase identified in rubber tree (*Hevea brasiliensis*). Green highlighted sequences in A and C groups indicate the typical extra  $\alpha/\beta$  region of about 70 amino acids described in plant and fungal Class V chitinases (Taira, 2009, Kamerewerd 2011).

## Figure S2

```

KAJ6787877.1 ----- 0
KAJ6782998.1 ----- 0
KFG78085.1 ----- 0
KAJ6788372.1 ----- 0
AGC24356.1 ----- 0
KAJ6789110.1 ----- 0
KAJ6785893.1 -----MMPSKYNALAVLLASSAYARTCLPAYEAQTSYVG-----CYHDPNSPR 43
KAJ6786934.1 ----- 0
KAJ6780833.1 ----- 0
KAJ6787866.1 ----- 0
KAJ6786079.1 ----- 0
KAJ6785739.1 ----- 0
KAJ6782204.1 MTSVAKPGDDGLLPSK-----PKYGSEEDSGDSDIELEELRDEVDAD 42
KFG84234.1 ----- 0
KAJ6788989.1 ----- 0

KAJ6787877.1 -----MRI-VEIASSLGLLLA----- 15
KAJ6782998.1 -----MHL-PLTHSLLALTIV----- 15
KFG78085.1 -----MAAANLNPKKPNSS----- 14
KAJ6788372.1 -----MTSNNAN----- 7
AGC24356.1 ----- 0
KAJ6789110.1 ----- 0
KAJ6785893.1 DLSGPLLTVGKL-----NSPQYCANICGAAGYSYSGVEYTVQCFCGYKIESTSIKADES 97
KAJ6786934.1 ----- 0
KAJ6780833.1 -----MKSPNSYCLAGL----- 13
KAJ6787866.1 -----MVAATKLLSVATAGWAVASAAAA----- 23
KAJ6786079.1 -----MLLPLLAGLALVHPA-V----- 16
KAJ6785739.1 -----MVQKTT-----ITSVAG-ALALFS--- 18
KAJ6782204.1 LLPGTRPGVSKKRHRRTASDHFLARIL---NWRLRKRTVFIVSIVGVLVVLGGLFG--- 96
KFG84234.1 -----MKSLSIFAALLT-AVVDAGLTS--- 22
KAJ6788989.1 -----MKTASFVAALLA-VGTDAAHFG--- 22

KAJ6787877.1 -----THAKPCAGA--ASDLDILAGQHVIYSFPTS- 43
KAJ6782998.1 -----SAASGSVKP--ACDLDILAGQHVIYSWDYTL 44
KFG78085.1 -----SSSDGSDLDPL--WQNLDWAVGQMLIMGWDGTE 45
KAJ6788372.1 -----NGAESADIDPI--YQNLDWAIGQTLIMGWDGTE 38
AGC24356.1 -----MTVGN--DDNLDKEIGQLLMCGFDGLE 25
KAJ6789110.1 -----MV--TPEQRKKVGQLFAVGFDHDTT 22
KAJ6785893.1 QCNADCPADPSKKCGGGMNINIYKINNP-SANPPLSPSPDCTRDPLCSNDVCDTSKSI 156
KAJ6786934.1 -----MAD 3
KAJ6780833.1 -----LLPAAVAGRATSPDVYPT--PQ GK-GE-----GPWAAAY 44
KAJ6787866.1 -----ASDGVITNDTYFYGQSPPVYPS--PEMS-SS-----GAWAEAQ 58
KAJ6786079.1 -----SNQIYFRAEPDAYQNSPEVLPS--PQIS-GQ-----NEWADAF 51
KAJ6785739.1 -----AQGHASAAATASGYDSPA YPA--PYGG-WV-----SEWRDSY 52
KAJ6782204.1 -----WGRYTQTTPDGHSPWPYPC--PRGG-TV-----SQWAEYS 128
KFG84234.1 -----PGHFHKL DARAELATSPPHYPS--PWMNPQA-----PGWEDAY 58
KAJ6788989.1 -----NN--TNSNSTTEQTGPLAHSPPFYPS--P WMDPKA-----PGWEDAY 60

KAJ6787877.1 STPPAQLVQLTKAGLVGGVILFGENVDAKTAAAMD--TLRQAYAASPAPA-LLKKT-TGV 99
KAJ6782998.1 PGPPDELYDLTRAGLVGGVLLYDVHVNKDTPAALA--KLQAAYKASPAHK-LLRKQ-SGR 100
KFG78085.1 VTP--QIKSLIEDHHLGSIILTAKNLKS--AQETA--KL VQEL-----Q-TIAKN-AGH 91
KAJ6788372.1 VTP--QIRTLIEDHHLGSIILTAKNLKS--AQQT A--RLVQEL-----Q-TIAQN-AGH 84
KAJ6789110.1 PTP--GIIDLIEHNHLGSIILFSRNIAT--PKQVQ--KLTHSL-----Q-QIARN-AGH 71
KAJ6785893.1 VNN--DIKSLIQDYGVAIVLFKRNVGS--AAELR--TLCDRL-----Q-QLAKD-AGH 68
KAJ6786934.1 DRAAAIVKVLTLDE-----KANNLASSAS-----GS 182
KAJ6780833.1 LNVEEV LKKLTITE-----KV ELLSGMSIA-----PAM 31
KAJ6787866.1 QSARALVGQMTLDE-----KVNITRGFK-ADN-----ICAGTTGSV 79
KAJ6786079.1 AKAQKLVSQMTLEE-----KVSLTG GADSIDN-----GCSGNVANI 94
KAJ6785739.1 AKAKAMVDQMSLEE-----KVSITGGVD-LKS-----GCSGTIAGI 86
KAJ6782204.1 SKAKKLVD SMTLAE-----KTNITAGTGIFMGKSRLSNQAKASDAAILRCNGNTGSA 104
KFG84234.1 EKAARMVRNMTLAE-----KVNITGTGWAMG-----LAVGNTGPA 164
KAJ6788989.1 KQARDFVSRMTLAE-----KVNLTGTGWMSD-----NCVGNSGAV 94
AKAKAFVSQTLAE-----KVNITGVGWMGE-----KCVGNVGSV 96
: :

KAJ6787877.1 ADA--KFFISTDQ---EGGQVRRMKGEE-----PKL--SPKQMGASADPAAAGKAGG 144
KAJ6782998.1 DTA--LLIMTNEE---GGTVFNGVHDGG-----PAL--SAKQVGASPDPAAGWQAG 145
KFG78085.1 PQ---PLLIADVQ---ENGGVNSLFDED-----YVCQFPSAMGIAATGRVELAYEI-Y 137
KAJ6788372.1 PQ---PLLIADVQ---ENGGVNSLFDED-----YVCQFPSAMGIAAAGSP ELAYEV-T 130
AGC24356.1 KR---PLFIADVQ---ENG VVRLGD-S-----GT YLPGNMALGALGSSSTAARNV-A 115
KAJ6789110.1 EQ---PLFIGIDQ---ENGLVTRISP-P-----VASQQPGPMALGAAGSLDIASQV-A 113
KAJ6785893.1 SKTGLPAYQWQNEALHGVAGSTGVQFQSPLGSNFS AATSFMPILLSAAFDDKMVKDV-A 241

```

KAJ6786934.1 PKHGIPSIIRMSD-----GPNVGRGTKFF--NGVPAACFPCGTALGSTFNQELLEKA-G 81  
KAJ6780833.1 PRLNWPGMCLHD-----AGNGVRAAEV--N-----AWPSALHSGASWDRNLTHQR-G 124  
KAJ6787866.1 SRLGFGPMCLSD-----AGNGLRATDFV--S-----SFPSGIHV GASWNKD LAARR-G 139  
KAJ6786079.1 PRLKFGPMCLND-----AGNGVRATDYV--S-----GFASGIVGASWNKVLAKQR-G 131  
KAJ6785739.1 PRVGFPMCLCLED-----GASGIRQADHV--T-----AFPDGITAGATFDKELMYQR-G 149  
KAJ6782204.1 IYAGFPSLALQD-----GPLGIRFADNA--T-----AFPAGITVGASWNKELMFQR-G 209  
KFG84234.1 PRLGLRALCLQD-----GPLGIRLS DYN--S-----AFPAGITAGATWSEHLWRDR-G 139  
KAJ6788989.1 PRMGLKSLCMQD-----GPLGLRFS DYN--S-----AFPVGVTAGASWARHLWRDR-G 141  
: : .:

KAJ6787877.1 AGAAATLKKFNNNAN----LAPVLGV-YREAGDFLDYYGRSFGNSSAAVAAAVPFIKA 198  
KAJ6782998.1 VQAAAAALKRYNFNVD----LAPVLGV-YRDEGNFLDTGNRSYGKTADKVIAATLPFIRA 199  
KFG78085.1 KATASEISACGVNLM-----LGPVLDV-LNNAR-YQPLGVRSTGDDPQEASQYGLAALNG 190  
KAJ6788372.1 KATATEISACGVNLM-----LGPVLDV-LNNAR-YQPLGVRATSDDPQEVSYGLAAMAG 183  
AGC24356.1 MATSKELLTLGMNWN----LAPVLDV-NNNPL-NPVI GVRSYGQDPELVARMGLAQVEG 168  
KAJ6789110.1 GATAEMLGHFGINMN----YAPVVDI-NSEPL-NPVI GVRSPGDDPEKVAQFASACAKG 166  
KAJ6785893.1 TIISTEARAFANHGFAGLDFWTPNINP-FRDPR--WGRGMETPGEDSFRISNYVVS LVDG 298  
KAJ6786934.1 KTMGDEATAKSAHLI-----LGP TIN-MQRSPL--GGRGFESIGEDPFLSGLGAALVRG 133  
KAJ6780833.1 LYMGGEFPGKGINIA-----LGPNAGPLGRTP--GGRNWEFGSVDPYLSGQLNAETITG 177  
KAJ6787866.1 AAMAGEFKKKGVNVL-----LGPVVGPAWRVT--SGRNWEGFSADPYLSGSLAAQSVAG 192  
KAJ6786079.1 VALGGENRRKGVNIM-----LGPVVGPAWTVK--GGRNWEGSSADPYLSGALAAETVVG 184  
KAJ6785739.1 VALGKEARGKGVNIL-----LGP TVGP IGRKPK--GGRNWEFGVDP TLQATGARQT IKG 202  
KAJ6782204.1 QAHGQEAAREKGINVL-----LGPSVGPLGRMPA--GGRNWEYGPDPY LQGIAAAETIRG 262  
KFG84234.1 KALGAESRDKGIDIA-----LGPASGPLGRAPT--GGRNAEGFGSDPY LQKGKLANTVIG 192  
KAJ6788989.1 NAMGSEARDKGVDVI-----LGPASGPLGRLSK--GGRIGEAFGADPY LQGQALANTVTG 194  
. \* .

KAJ6787877.1 QQAAG-----VAATA--KHFPGLGAASHDANT-----DTGPVTLEQSLDEIRSIDE 242  
KAJ6782998.1 QRERG-----ILVSI--KHYPGLGAARKDQNT-----DAAPVTLDVSRADLESIDL 243  
KFG78085.1 IRDAG-----IAAAG--KHFP SYGNLDFQGSN-----S-AVPVITQTLEELSLSAL 233  
KAJ6788372.1 IRDAG-----IATCG--KHFP SYGNLDFLGSS-----L-DVP IITQTLEELSLSAL 226  
AGC24356.1 YQRGK-----VATSI--KHFP GHGDTA-TDSH-----L-DVP VINKTLEELDKTEL 210  
KAJ6789110.1 MRENK-----VVP CI--KHFP GHGDTA-VDSH-----Y-GLPSIDKSRAQLDAVEL 208  
KAJ6785893.1 LQGGINPEFHRTISTC--KHFAAYDVESGRTQN-----DIHPTRQDMADYYL 343  
KAJ6786934.1 IQSTG-----VVATI--KHFLCNDQEDKRMGV-----QSVITERALREIYA 172  
KAJ6780833.1 IQKAG-----VIANI--KHFIANEQET YRRPY-----FGVEAASSNVDDKT LHEYYL 222  
KAJ6787866.1 IQQGQ-----VITST--KHFIANEQETNRNP-----QDVQSLSSNIDDKTMH EYL 237  
KAJ6786079.1 VQSQN-----VMTSVKKQHYIGNEQEL YRSLE-----GDIQAISSNIDDKTMH EYL 231  
KAJ6785739.1 IQEQG-----VIATI--KHLVGNEQEMYRMYN-----PFQQA YSSNIDDR TLHEVYL 247  
KAJ6782204.1 IQEGG-----VMATI--KH FVANEQE HFRQP-----WAWGLPHAVSSNVDDRTMH ELYA 309  
KFG84234.1 IQESG-----VIACA--KHFIANEQE HFRQAGESVPRGFNISELSSNVDDKT LHEDYA 244  
KAJ6788989.1 IQGAG-----VVACA--KH YIANEQE HFRQVGESVDRGYDISETLSSNVNDKLMHEYY 246  
: : \*

KAJ6787877.1 APYVGAIA-AGVELVM----MSWA--VYPALDG-RPAGLSNKWVQDELGRGLGFTG---V 291  
KAJ6782998.1 RPFQAAIR-AGVDMVM----ASWA--VYPAVDGAWPAGLSSRMKDILRGLGFRG---V 293  
KFG78085.1 VPF RNAIA-TGKLDAM---FVGGCGISNPSMNVG-HACLS DQVVDLLRNELGFKG---V 285  
KAJ6788372.1 VPF RNAVA-SGKLDAM---FVGGCGLSNPSMNVS-HACLS DQVVDMLRNEMGFRG---V 278  
AGC24356.1 VPFKKALE-AGGIACPTSMVGHM--LLPHFNKDVSSIAPEIVRDLRRRFGYKG---V 264  
KAJ6789110.1 IPFKRAAQ-EGIE---MIMTAHI--AMPQLTGS DMPSTLSPQVLSILRDEFKFDG---V 258  
KAJ6785893.1 PMFERCVRDAKVG SVM-----C--AYNSVDGI-PACASSYLLQTVLRDGNWFKEPYNY 393  
KAJ6786934.1 MPQLAVRDANPGA FM-----T--AYNGINGT-FCSENPKYLDGMLRKEWGWGD---L 219  
KAJ6780833.1 WPFMDGVH-AGVGSVM-----C--SYNRINNT-YGCENSKLMNGLLKGE LAFDG---F 268  
KAJ6787866.1 WPFQDAVH-AGSGNIM-----C--SYQRINNS-YGCANSKTLNGLLKSELGFQG---F 283  
KAJ6786079.1 WPFVDLVK-AGTANVM-----C--SYNRLNQT-YACGNSKTLNGLLKTELGFQG---F 277  
KAJ6785739.1 WPF AEGIH-AGVGAVM-----T--AYNAVNGS-AC SQNPYLNGILKDELGFQG---F 293  
KAJ6782204.1 WPFANAVK-AGVASVM-----C--SYNMVNNS-YACGNSKLLNGLKDELGFQG---F 355  
KFG84234.1 WPFADAIR-AGVGSIM-----C--SYNQINNS-YACQNSKLLNGLKDEM GFQG---F 290  
KAJ6788989.1 WPFQDAVK-AGVGSIM-----C--SYNQVNNS-YACQNSKLLNGLKHE YGFQG---F 292  
: . : \* :

KAJ6787877.1 TITDAMEAGSLKG----FGGAEETAKLAAAAGMDLLASGRNVTOG--DTIRKAVVSGIQ 345  
KAJ6782998.1 TITEAMEAGSILP----FGDVEERTKIAVRAGNDLILASGLNVTEG--EVIRKALVEGLK 347  
KFG78085.1 AISECLEMEALSH----DLGVQNGVVMAVEAGCDLVLLCRAYDVQL--EAI-KGLKLGYE 338  
KAJ6788372.1 AISECLEMEALSH----DLGVQNGVVMAVEAGCDLVLLCRAYDIQL--EAI-KGLQLGLE 331  
AGC24356.1 IITDCELEMDAVKE----TVGT PKGALMALQAGNDMAMISHTLAFQK--DAF-KVLYSALQ 317  
KAJ6789110.1 IMTDCLEMDGIRA----TYGTVEGALLAFQAGVDNVMICHTYDVQT--AAV-DRICAALE 311  
KAJ6785893.1 VVSDCDVDNIFDPHHYAKDRVEASALGINAGTDLDCGD-----TY--TNLNQGV R 442  
KAJ6786934.1 IMSDWYGTYSTND-----AVKAGLDLEMPGPS-----RFRGEALQFNAS 258  
KAJ6780833.1 VMLDWN AQHNL-N-----SANAGLDM LMPMG-----GNWQNL TNAVR 305  
KAJ6787866.1 VVSDWGAQHTGHA-----GALAGMDMAMPNP-----GSFWGDEL VKSVK 322  
KAJ6786079.1 VVSDWGAQH AL-T-----DAPNGLDMGMPNS-----DPYWGAA LVNAV K 315  
KAJ6785739.1 VMSDWLGHMSGVE-----SALAGLDM DMPGDTQVPLLGYSYWMFELTRSA L 339  
KAJ6782204.1 VMSDWLAQQSGVA-----SALAGLDM SMPGDGLGWT DGESLWGFQLSRAVL 401  
KFG84234.1 VMSDWQAQHGGAA-----TAVAGLDM SMPGDTE-FNTGYSFWGGNLT LAVI 335  
KAJ6788989.1 VMSDWQAQHS GVS-----NAVAGMDMAMPGDTI-FNTGRSYWGGNLT LAVL 337  
: : \* \* :

KAJ6787877.1 SGRLSRAQFDEATKRIAAMRSKL-----WA----- 370  
KAJ6782998.1 RGLGRDEFQATERIALRKV----- 369  
KFG78085.1 NGIITKDRIFTSIRRVQHLKSTCT-----SWAKALN-----P 370  
KAJ6788372.1 NGIITKERIFTSIRRVLHLKASCT-----SWSKALN-----P 363  
AGC24356.1 EGQLDKDEIRQSLQ RVAQLKDQFL-----NWDDVLQ-----Q 349  
KAJ6789110.1 KDEISQTRIDESLARLSK LKAKFT-----NWDRALQ-----T 343  
KAJ6785893.1 SKLTTEATLDKSLGRLYSALIKVGYFNPP----AQYNR----- 476  
KAJ6786934.1 TGKPFIIHIDE---RVRAVLKLVKKVSSL--PIE-----EN----- 289  
KAJ6780833.1 NGTVAEARVSDMATRIVASWYLVGQD--N-FPVPGIGMK-----NLT 344  
KAJ6787866.1 NGSVPESRINDMATRILTTWYQFKQD-EH-FPNPGVGMP-----K DVT 363  
KAJ6786079.1 SSVVPESRVTDAMRIIASWYQLKQDDPS-FPAPGIGMP-----GNLT 357  
KAJ6785739.1 NGSVPMTRLNDMATRIVATWYHMGQDQGF---PATNFHYNTRDEKGPLYPAAWPESPTT 395  
KAJ6782204.1 NGSPLVSRLLDDMTARIVASWYQLGQDDKSRFDRKGPNFSSWTNDKMGYINDGTSSSRQEKV 461  
KFG84234.1 NGTVPAYRIDDMMAMRIMASFFKVGMPKPGK---QVPTSFSWTRDTFGYRQAAAKENWEQV 392  
KAJ6788989.1 NGTVPAYRVDDMMAMRIMASL FKVGNVET---AKDTNFFSWSRNTYD YRHAAAKESMEQV 394

.\*:

KAJ6787877.1 ----- 370  
KAJ6782998.1 ----- 369  
KFG78085.1 PGISLLSQLHPSHVSLSRRAYDESITVIRDKEKMLPLASSMHPGE----- 415  
KAJ6788372.1 PGISLLSQLHPSHLALSRRAFDESITVIRDKEQLLPLARSMHPGE----- 408  
AGC24356.1 ADLKTMGSE--AHATLSKELYDRVPTVVTNRKNTLPIRPAQTDK----- 391  
KAJ6789110.1 STDAALDDINARGAKLAHKAYADAATVVRIDDKILPLSTSASTV----- 387  
KAJ6785893.1 --LGWADVNTTEAQTLAYNAAVKGMTLLKN-DGTLPLSK----- 512  
KAJ6786934.1 --GPENTRDTPETAAALLRKIGNESIVLLKNDNDNLPFTKEKKTIVLGPNAKEATYHGGGS 347  
KAJ6780833.1 EPHLEVDARNPESKPILMGAI TGHVLLKNTNNTLPFKGKQK----- 386  
KAJ6787866.1 KPHKIVDGRDPAAPVLLDGA VEGHVLVKNKTSTLPLRQ-PK----- 404  
KAJ6786079.1 VPHRIIEGRDPADLPVILQGAIESHVLVKNKSTLPLQS-PK----- 398  
KAJ6785739.1 VINENIDVRADH-DIVARQAQDAITLLKNDAGLLPLSE-ER----- 435  
KAJ6782204.1 EVNQYVNAQHNH-SILAREVA VEGTVLLKN-SGILPLTR-SGPRTR-----TKHKEGK 511  
KFG84234.1 --NFQVDVVRGDH-AAHIRE SAAKGTVILKN-TGSLPLNK-PK----- 429  
KAJ6788989.1 --NFQVDVRANH-ANHIRE SGA KGTVILKN-NGALPLNK-PK----- 431

KAJ6787877.1 ----- 370  
KAJ6782998.1 ----- 369  
KFG78085.1 ELLLLTPLVKPLPAS-----AMTKS----- 435  
KAJ6788372.1 ELLLLTPLVKPLPAS-----SLTKS----- 428  
AGC24356.1 -ILFLAA-----HV-----PQTL----- 403  
KAJ6789110.1 -FVSPGP-----DF-----PVGGG----- 400  
KAJ6785893.1 -FLSNVAIIGPWANVTDKMQGNYAGTAPLL-----VNPLDVFQKRWQN 554  
KAJ6786934.1 AALRAYYAVTPYEGI-----GEKLGTPFTTVGAYTHRFLPILGNQLTDPNGKQGMWRV 402  
KAJ6780833.1 -ML-----SVF-----GYDAALPETKNTD-----ILFQL 409  
KAJ6787866.1 -MV-----SLF-----GYSAKSPDFPAGGNLQL-----LQWQL 432  
KAJ6786079.1 -KV-----SIF-----GYSASTPPKWT AQDDT-D-----GTWRF 425  
KAJ6785739.1 -SI-----KVF-----GTDAAKNP----- 448  
KAJ6782204.1 VNI-----GIF-----GDDAGP-G----- 524  
KFG84234.1 -FL-----AVI-----GEDAGQNS----- 442  
KAJ6788989.1 -FL-----AVI-----GEDAGPNP----- 444

KAJ6787877.1 ----- 370  
KAJ6782998.1 ----- 369  
KFG78085.1 -----LLESKKTWSQAPTQH-----D 451  
KAJ6788372.1 -----LLDAKNDQSAATGPH-----E 444  
AGC24356.1 -----AVDSE-----KEP----- 411  
KAJ6789110.1 -----AVNSG-----DAAHPTR-----V 413  
KAJ6785893.1 VKYVQG-----AD--IDSGNTG----- 569  
KAJ6786934.1 FNEVPGTADRKLIDELQFTKTEH LVDYSNPNVNDVWYADMEGSLVADEDCTYEIGVVVS 462  
KAJ6780833.1 GYYS-----SQEMAQAVLGTEAHFDQAARG--GTIIS 439  
KAJ6787866.1 GAES-----IDLNEVLAGALGNAANASSIGIN--GTLFG 464  
KAJ6786079.1 GLAP-----V-----FEEDPATSP TGGR--GTMFG 448  
KAJ6785739.1 -----DGNACADRNCNK--GTLGQ 466  
KAJ6782204.1 -----LGNHCADRGCNE--GTLGS 542  
KFG84234.1 -----RGPNGCDDRGCD--GTLAM 460  
KAJ6788989.1 -----KGPNGCADRGCDD--GTLAM 462

KAJ6787877.1 ----- 370  
KAJ6782998.1 ----- 369  
KFG78085.1 SWAHKDRE-----RSAIMSGEGVF----- 470  
KAJ6788372.1 RWAHRRLD-----RTAHMSGEGVFREFGKTLARYNEKLLHTSY----- 483  
AGC24356.1 -----FNSFHASLLK-RHTNLEYIIY----- 431  
KAJ6789110.1 SWV-----SSSFGDEIRK-HCAGAE EIRY----- 436  
KAJ6785893.1 FGAA----- 574  
KAJ6786934.1 GTAKAFVNDQLIVDNATNQVAGDAFFGSATREERG-RVEMKKGETYNFRIEFGSAPTYTL 521  
KAJ6780833.1 GGRAAATAPSYIIDPLNAT-----Q-QRAMEDDTWV----- 469

KAJ6787866.1 GCGSGATTPANAVSPLEAI-----K-ARTYRDGTAL----- 494  
KAJ6786079.1 AGGSGAITPQDSVSPQAF-----V-ARAAKDGFTL----- 478  
KAJ6785739.1 GWGSGTVDYTYLDDPIGAL-----Q-ARVKNVTL-Y----- 495  
KAJ6782204.1 GWGSGAVDFPYLVTPESSL-----S-ATFDLNAVNISSSL----- 576  
KFG84234.1 LWGSGTSQFPYLITPDSAL-----Q-RQAIQDGSRYESVL----- 494  
KAJ6788989.1 LWGSGTSNFPYLITPDSAL-----Q-QQAIKDGSRYESVL----- 496

KAJ6787877.1 ----- 370  
KAJ6782998.1 ----- 369  
KFG78085.1 -----LHENLIARASCIIVTADANRNMYQAGF- 498  
KAJ6788372.1 -----TANGV---RPVHENLINRASCIVIFTADANRNLYQAGF- 518  
AGC24356.1 -----NEET---PDLSQKIQEADWVIIGTANANLYPFQVRM- 464  
KAJ6789110.1 -----TEDPL---TDEQWSKIEGADVLIATRNAREAPYQQKL- 471  
KAJ6785893.1 -----LDAARSSDHIIYLGIDIDIVENEGH----- 599  
KAJ6786934.1 KGDAYVPGHGSRLRVGGCKVIDDQEEIKKSVQLAKEHDQVVICAGLNADWETEGA----- 575  
KAJ6780833.1 -----NWDTKSFDPPVNPA---SNACLVFINAISTEGWDRDGL- 504  
KAJ6787866.1 -----FHDLASPSPVVDPA---SDVCLVLGNAFACEAYDRPAL- 529  
KAJ6786079.1 -----VQDLTSPPQVDPDA---SDVCVVFVGNAREGNDPQL- 513  
KAJ6785739.1 -----NTDSVPSPSLPKPAD---DDIAIVFISSDAGENTYTVEGN 531  
KAJ6782204.1 -----SNKK---PSKDLLQA---MDVCIVFANADAGEGFIRWESV 610  
KFG84234.1 -----SNYQWAATQORVVAQP---NVTAVVFNADSGEGYIEVDGN 531  
KAJ6788989.1 -----SNYAWPATHDLVSQP---NVTAVFANSNAGEGYINVGGN 533

KAJ6787877.1 ----- 370  
KAJ6782998.1 ----- 369  
KFG78085.1 -----TKHVDMMCSMHRSGNKKQLIVVAVSSPYD---FAMDKSIGTYICT 541  
KAJ6788372.1 -----TKHVEMMCSMLRSRGQKKHLIVVAVSSPYD---FAMDKSIGTYICT 561  
AGC24356.1 -----VQ-----QAQKLAKRLVVAVMNPYD---QMCFPQVDTYLVT 498  
KAJ6789110.1 -----GLD-----IAQRRSGKTVISIATCAPYD---FLEEPAIKNVIVV 507  
KAJ6785893.1 ---DRT---SISWPGNQDLISQLSNLKG---PLVIVKFGGGQVDDSSLSNSKVNIVWA 651  
KAJ6786934.1 ---DRA---SMKLPGVLDQLIAEVAAANP---NTVVVMQTGTPEEMP-WLS---QTKAVLQA 624  
KAJ6780833.1 -----HDDFSDGLVRNVASKCA---NTIVVVHAGSIRLVQDQWIEHPNVTAAIIA 550  
KAJ6787866.1 -----QDAYTDDLKVTVAASCA---RTVVVLHAGPRVVDADWIEHDNVTAVIFA 575  
KAJ6786079.1 -----EDAYTDTMINAVADRCA---KTVVVFHAGPRVLDGFFVNHNPNTAVIFG 559  
KAJ6785739.1 HGDRDASKLYAWHNGDQLVQDVAKKYR---NVIVVVHTVGPLVLEKWIELPTVKSVLIA 587  
KAJ6782204.1 AGDRN---DLFLQRRGGDYLVLAEECGGGKGTIVVVHAGVPVVMERWIDHPGIGAVLAA 668  
KFG84234.1 AGDRK---NLTLWKNGGDLIKNVSSICH---NTIVVIHSVGPVLVTDWYQNPNISAIVWA 585  
KAJ6788989.1 EGDRN---NLTLWKNGGDLIRNVSALCR---NTIVVIHSGGPVLLDEISKNEVNTAVIWA 587

KAJ6787877.1 ----- 370  
KAJ6782998.1 ----- 369  
KFG78085.1 FDFTEADAMSALVRVLVGEITPIGSMPTLRKSKKVLK-----SRQHHLV 585  
KAJ6788372.1 FDFTENAMASLVRVLIGEVPVGSPLPGLTLRKSKKVLK-----SRQLWL 605  
AGC24356.1 YEYTPPAHEAAVRILFGEIETRSRLPISIPNVDDAIA-----P-ATFIV 541  
KAJ6789110.1 YEPTLEAFRSAVDIIYGVDTPRGKLPVAEKKV----- 539  
KAJ6785893.1 GYPGQEGGNAVFVLTGAAPPAGRLPITQYPKSYVENNNILDMNLRPSN-----GIPG 704  
KAJ6786934.1 WYGGNETGNCIADTIFGDSNPSSKLSLSFPKR-LQDTPAFNLNR-----TEAGRTLYGE 677  
KAJ6780833.1 HVPQDQSGRAIVKLLYGEADFSGLPYTIAKN-ESDYAVYK-PCGLAHKGDTPQCDYTE 608  
KAJ6787866.1 HLPQDQSGAALVSLLYGDVPSGKLPYTLAKR-DTDYPVLK-PSRPEGRFVNFPQSNFTE 633  
KAJ6786079.1 HLPQQAAGDAIVQLLFGDANPSGKLPYTVAKQ-AADYGPLLDPQASPG--SQSPQAYFPQ 616  
KAJ6785739.1 HLPQQEAGRSLEVLYGDVSPNGHLPYSITHA-EEDMPKSVTDLINFELAGKQADDDYTE 646  
KAJ6782204.1 NLPQQESGNAISTIIIFGDASPSGKLPYTIGKS-LEDYGGGAKVMTYTPN--GLVPQQDFNE 725  
KFG84234.1 GLPGQESGNSITDILYGKTSP-GRSPFTWGP-RESYGTD--VLYKPNNGNGAPQDDFTE 641  
KAJ6788989.1 GQPGQESGNSLTDILYGKTSP-GRTPFTWGAS-EAAYGND--VLYKPNNGKAPQDDFTD 643

KAJ6787877.1 ----- 370  
KAJ6782998.1 ----- 369  
KFG78085.1 EEYDRARDYAGLEDLLKAVHRASAPDLHFLKSTRAASMEHLHPNIKETHFV----- 636  
KAJ6788372.1 EEYDRERDATGLDILLKAIHRSGGSDLDPLANTASAFELFNTNIKEAHYV----- 656  
AGC24356.1 DDYRNDDDLHVMTAMWDDIFG---KDWPLR---KDKINLGLQRAKLQKKH----- 585  
KAJ6789110.1 ----- 539  
KAJ6785893.1 RT---YMWY---T-----GKPILPFGYGLHYTNFSTSWTKPSASYSIQALA--- 745  
KAJ6786934.1 DVYIGYRYEFAD-----REVNFPGHGLSYTTFGFSDLNVNADGKI----- 720  
KAJ6780833.1 GQYLDYRAFDKAKN-----ITPRFEFGYGLSYTTFNYSYLSISAHG----- 648  
KAJ6787866.1 GVFTDYRHFQKQK-----ITPRFEFGYGLSYTTFGLANLQARR-FDNASDALA--- 680  
KAJ6786079.1 GVVTDYKYFEQAH-----IEPRYEFGLSYTRFDYSDIVLGARPNAPTTPPP--- 664  
KAJ6785739.1 GLYIDYRWLNKQK-----IKPRYAFGHGLSYTKFNLSASIKKVTSLTKT-PPARA 696  
KAJ6782204.1 GVVVDYRHFQKFN-----IQPRFEFGYGLSYTTFNYSNLQLTEVKAKSRLAGERPA 776  
KFG84234.1 GSFIDYRHFQKVPAG-KNS---TGAPIYEFHGLSWSTFEYSNLKVEKRDVRP--MSPPNG 696  
KAJ6788989.1 GAFFDYRHFQKESDG-KPGSDPKAPVYEFHGLSWSTFEYSNLQVVKNDPRP--YKPTTG 700

KAJ6787877.1 ----- 370  
KAJ6782998.1 ----- 369

KFG78085.1 -----VRNSSTGALYGVFATYFI----AGVG----- 658  
KAJ6788372.1 -----VRNSSTQALYGVFATYAT----GGVG----- 678  
AGC24356.1 -----VARDSQGKIVGVFATQIVVVDNKKHG----- 611  
KAJ6789110.1 ----- 539  
KAJ6785893.1 ----- 745  
KAJ6786934.1 ----- 720  
KAJ6780833.1 ----- 648  
KAJ6787866.1 ----- 680  
KAJ6786079.1 ----- 664  
KAJ6785739.1 AKSGILDYSQKIPDASEGVAPDGFKKLFRYIYSWVQPNEAADAVK----DAATKKYPYP 751  
KAJ6782204.1 DQANPPDFEDKIPDISEAIFPSEIRKLKKFIYPYITSASDIKPG--VYPY-----P 825  
KFG84234.1 KTIAAPTFGNFSTNLKDYAFPPSIRYIYQFTYPLWNTTASGKEASGDPHYGQTAEQFLPP 756  
KAJ6788989.1 NSIAAPTFGNFSKDIKDYGFPAHFHYVKQFIYPLWNTTSSGKEASGDSSYGKTADEFLPP 760

KAJ6787877.1 ----- 370  
KAJ6782998.1 ----- 369  
KFG78085.1 -----II-----GALLVDPSKRN 672  
KAJ6788372.1 -----IL-----GALFVDPTRKN 692  
AGC24356.1 -----QL-----MLLMVSPSYQ 625  
KAJ6789110.1 ----- 539  
KAJ6785893.1 -----SQAGNDPNNALFAN---LAISVKNTGGEANIASDYVGLLFLSSQNAG- 789  
KAJ6786934.1 -----IAIVTVTNTGS--R-AGSAVAQMYIEPKQAA- 748  
KAJ6780833.1 -----VRKCVSTTLNELWEVVATLEVSITNSG---AVAGHEVAQLYLGIPGA-- 692  
KAJ6787866.1 -----EYPTGAVIPGGHADLWDNLVSVTADVNTGR--NHTGAEVVQLYLGIPIGG- 729  
KAJ6786079.1 -----EYPSGEIVSGGQKDLWEVLATVKCRLVNGG---KVAGAEAVQLYVRFPGM-- 711  
KAJ6785739.1 DGYSTEQKPGPRAGGGEGGNPALWDVAYTSLVKVTNVGN--KYGGKASVQAYLQFPDDA- 808  
KAJ6782204.1 DG-YDVKQPPSAAGGGQGGHPELWETHVSVQADVGNEGA--V-GGKVVAQLYISFPNTK- 880  
KFG84234.1 GATDGSPQRLASSGEPGGRQLWDVVYTVSATITNTGK--R-VSDEIPQLYISLG---- 809  
KAJ6788989.1 NAIDANPQPKHPAGGEPGGRQLFDVIYEVTATITNTGK--T-MTDEVPLQLYLSHG---- 813

KAJ6787877.1 ----- 370  
KAJ6782998.1 ----- 369  
KFG78085.1 SIGRSLHRRALKSLSQQRGLKKVQVGMSPGVFLGIPLDPE-ANTVKEWFSNSGWDTPFP 731  
KAJ6788372.1 SIGRSLHKRALKTLSQQRGIKRVQLGACFPSVFPGIALGVE-AATVTRWFSNSGWDTPFP 751  
AGC24356.1 GVGTLHLDAALEHFR-EQGADCIKLGSTYPRFFPGVPDDDAQSRKAQAFFSKKGWRMD-- 682  
KAJ6789110.1 ----- 539  
KAJ6785893.1 --PS---PRPNKKLVSYGRAQSIQVGSTQQLNL-RI-----NIAELARSDEN-- 830  
KAJ6786934.1 --RI---NRPVKELRGFAKVE-LEAGASKTVTISEL-----EKYAAAYFDEE-- 789  
KAJ6780833.1 -----PPQQLRGFEKLG-LQPRETGKATF-EL-----TKRDLSQWDVV-- 728  
KAJ6787866.1 --GAAAAPPVRQLRGYEKVT-LQPGETKTASF-AL-----SRDLSVWNVE-- 772  
KAJ6786079.1 -----QAKQLRGFEKPT-LKPGESRSVSF-EL-----TRRELSVWNTE-- 747  
KAJ6785739.1 --GY---ETPIIQLRDFEKTKTIAPIGGSETVKL-QL-----TRKDLSVWDTV-- 849  
KAJ6782204.1 --GV---DFPVRALRGFEKVY-LEPGQTKSVQF-NL-----TRRDLSYWDTT-- 920  
KFG84234.1 --GK---NEPVRVLRGFNRIEGIAPGQNVTFRH-EI-----TRREISNWDTA-- 850  
KAJ6788989.1 --GE---GEPVRVLRGFDRIERIAPGASATFRV-EL-----TRRDISNWDN-- 854

KAJ6787877.1 ----- 370  
KAJ6782998.1 ----- 369  
KFG78085.1 RRLTNMIIHNLPNWVAPEGLLQSIQRANISFDLIHGLENAESVLHHVRANANPEVLELYT 791  
KAJ6788372.1 RRLTNMIIADLGNWTAPEGLLPTIQRANISFDLIHGLDNADTVLHHVRTESGPEVVELYR 811  
AGC24356.1 DNLVHDLIGDLQDYKVPDKIQARMLKEKIWFGRIPSETWELYAF--QQRNFPHWLSTYQ 740  
KAJ6789110.1 ----- 539  
KAJ6785893.1 -----GDKYIYP----- 837  
KAJ6786934.1 -----RDQWCVES----- 797  
KAJ6780833.1 -----QQKWLHA----- 736  
KAJ6787866.1 -----RQKWLHP----- 780  
KAJ6786079.1 -----KQMWQLQR----- 755  
KAJ6785739.1 -----KQDWVIPTVD----- 859  
KAJ6782204.1 -----LQNWVMPE----- 928  
KFG84234.1 -----SQNWVITK----- 858  
KAJ6788989.1 -----AQNWVVD----- 862

KAJ6787877.1 ----- 370  
KAJ6782998.1 ----- 369  
KFG78085.1 YA--LSEKTCGIVRAKDPGSGNLIGTVII----CRQGSPLVTYIPPLSD----GEDVG 840  
KAJ6788372.1 YA--LAETKSCGIVRAKDPAGAIMGTIII----CRQGSPLSTYIPALRSR----SENVA 860  
AGC24356.1 HHVELGDYQDLIVARQDDENGRVIASLIL---NTHVS-HEYRSDLIWTDDKLFGRSG 795  
KAJ6789110.1 ----- 539  
KAJ6785893.1 -----GDYTLTLDTTGATAA-----QFKLTGQPAKI--STLPRK----- 869  
KAJ6786934.1 -----GEYDVVISDSSAVTEKALRATINVSESYWWSGI----- 830  
KAJ6780833.1 -----GEYKIYVGASSRDIR--LTGKIVISG----- 760  
KAJ6787866.1 -----GTYTVWVGTSSRNLP--LKQTLKI----- 802  
KAJ6786079.1 -----GDYEIYIGRSSSKLP--LKTYLTI----- 777  
KAJ6785739.1 -----GGYKVVWGEASDNLG--TVCSIDSMK--CQSGAKGPV--Q----- 893

```

KAJ6782204.1  -----GQFSIAVGASSRDLP--LTGTW----- 948
KFG84234.1    -----APKKVFVGSSSRNLP--LSADLN----- 879
KAJ6788989.1  -----APKTIWVGSSSRNLP--LSAKLQ----- 883

KAJ6787877.1  ----- 370
KAJ6782998.1  ----- 369
KFG78085.1    GIIAPIVPSTPQATLVLQGLALMGVRQSKGHRASKAVLSWIVDDAFEPLVAMGFDILQAF 900
KAJ6788372.1  GIVAPTVPFGPLSTLVLQGLALMGVRQCKSHKASKAVLSWVIDDTSEPLIGMGFEALQSF 920
AGC24356.1    GMACVGVAQEERGRGIGIGIVAHANWLLKQRGVTKSYYVDWVELDFYS--RVGYKTWRSY 853
KAJ6789110.1  ----- 539
KAJ6785893.1  -----S----- 870
KAJ6786934.1  ----- 830
KAJ6780833.1  ----- 760
KAJ6787866.1  ----- 802
KAJ6786079.1  ----- 777
KAJ6785739.1  ----- 893
KAJ6782204.1  ----- 948
KFG84234.1    ----- 879
KAJ6788989.1  ----- 883

KAJ6787877.1  ----- 370
KAJ6782998.1  ----- 369
KFG78085.1    EEITNSPEV--- 909
KAJ6788372.1  EEITNSPDIFQN 932
AGC24356.1    RLGH-----F-- 858
KAJ6789110.1  ----- 539
KAJ6785893.1  ----- 870
KAJ6786934.1  ----- 830
KAJ6780833.1  ----- 760
KAJ6787866.1  ----- 802
KAJ6786079.1  ----- 777
KAJ6785739.1  ----- 893
KAJ6782204.1  ----- 948
KFG84234.1    ----- 879
KAJ6788989.1  ----- 883

```

**Figure S2. Clustal alignment of *A. album* GH3 enzymes.** The twelve sequences were aligned together with the GH3  $\beta$ -N-acetylhexosaminidases identified in *R. miehei* (AGC24356) and *M. anisopliae* (KFG78085) and with one *M. anisopliae* GH3  $\beta$ -glucosidases (KFG84234). Boxed sequences correspond to the conserved motif KHF(I)PGH(L)GXXXXDS(T)H, typical of GH3 sequences.

## Figure S3

```

KAJ6780494.1 ----- 0
KAJ6784096.1 -----MAS---TQT---FGGKRAMTAGSVRPTANYEKPra 29
KAJ6785798.1 ----- 0
KAJ6785933.1 ----- 0
KFG80340.1 ----- 0
KAJ6783033.1 ----- 0
KAJ6780076.1 ----- 0
KAJ6789215.1 MYKFVQLFCLFWLFLLTVHALAAGLQDTTTTTTGGIVVARSHAVTVG-FLPVQRFHHLQA 59
KAJ6787434.1 ----- 0
KFG85702.1 ----- 0
KAJ6780083.1 ----- 0

KAJ6780494.1 ----- 0
KAJ6784096.1 RGAEPGARADKES-----ALHLGQQPGAD 53
KAJ6785798.1 ----- 0
KAJ6785933.1 ----- 0
KFG80340.1 ----- 0
KAJ6783033.1 ----- 0
KAJ6780076.1 ----- 0
KAJ6789215.1 RDQAAGSSCSSEGQWNCMTNSWQRCAAGRWS TTQCAKGTTCAPAGLTNEFRIQHDGSVN 119
KAJ6787434.1 ----- 0
KFG85702.1 ----- 0
KAJ6780083.1 ----- 0

KAJ6780494.1 -----MLHQQCATALWASI-----VALSLSAT 22
KAJ6784096.1 GARRPDSEEQEAADAAAANRDLTGPAAPTAHLWHRR---RLCRDRWEFAAQWNEAFF 109
KAJ6785798.1 -----MWSS--- 4
KAJ6785933.1 ----- 0
KFG80340.1 ----- 0
KAJ6783033.1 ----- 0
KAJ6780076.1 ----- 0
KAJ6789215.1 GNGGPPTTSVA-----ASLGTRTWVSKVGTGFLVLGWVFLRIKFAIHSK 163
KAJ6787434.1 ----- 0
KFG85702.1 ----- 0
KAJ6780083.1 ----- 0

KAJ6780494.1 ASPI-----V-----GS-----SADAAQIDLNGAADSK---SNLPAVWPPPQKISGS 61
KAJ6784096.1 ESDKMHAMVDKIKEIIQELTQDLNRNGLSQI--VLSTLACQGA---ASLIGIPTADYTT 164
KAJ6785798.1 -----FNL--LSGLLLLDVAL---AHLPGIPTVPFKG 31
KAJ6785933.1 ----- 0
KFG80340.1 -----MR-----FYTSALLAALATVELTSAVTVKVNPLPAPQDVTWG 37
KAJ6783033.1 -----MRS---QSLSSALLIWL-AAATGLGAAVKVNPLPAPQEITWG 38
KAJ6780076.1 -----MRL---IVF--STLLA--AA--TALWPVPKELQTG 26
KAJ6789215.1 ESSL---GLPSVDVVFYCFRK--ARSGMHLRIVFVVVASAQ--LA--AALWPVPKHLSTG 214
KAJ6787434.1 -----MLSKFLALLALAAIG--QV--NAIWPIPSSLSTG 30
KFG85702.1 -----MLNNAIIAVALAALR--PV--DAIWPVPQQISTG 31
KAJ6780083.1 -----MRLHSY--LAVALAAS--PV--AALWPIPIDISTG 29

KAJ6780494.1 GDCAV----R--L-----SSEVTIVTGNATDG----PTIKVIQ 89
KAJ6784096.1 TECK-----RF-----DLRQVSGIVVDAQHASARDTQGATLIP 197
KAJ6785798.1 DGKK-----TF-----KLDVAVQTVIDSKYTKTTDKSGLTLIP 64
KAJ6785933.1 -----MSLIP 5
KFG80340.1 DSGP-----KHVGW-----LNL--RTNSN-RKSESNTQLVSEAWNRAKAITSLRWVP 82
KAJ6783033.1 ESGA-----IPVGY-----LTL--RTVNADWSTNDNVRIVNDAWNRAFKAITTIRWVP 84
KAJ6780076.1 NETVWIGQDIQVSYRHGNNCYVDFGKNADDSHDEITVRAVVRGAIARALSTVFDEGLIP 86
KAJ6789215.1 QTILEIGTALKITYNGGSLAWNQAQVDSQ-----NLNDTNIVQGGIARAYNAIESGFVP 269
KAJ6787434.1 SDVLFISQDIQVTFNGGALSASS-----GGGRSTIPDAVARTLDTILKKGFTP 80
KFG85702.1 QDVLFDVKSQVITYNGEPVSYDGRTGETK---ESPSSSSQVVHDAVARSLTAIFEHGLVP 88
KAJ6780083.1 NKTLYIDKTINITYNGEPLQYTTGYNPPA---GSSFTSKSIVQGALARSLKAIFDDGYVP 86

KAJ6780494.1 AIVAAAGGKATVSPYASGAGAQIF-----VGTDSENRA-----AADAAKALT 131
KAJ6784096.1 PTLQEFAT--TFA-----SDLASSIGIKTNVEVAAAPRDQ---CIYI-TLDP-QGNY 242

```



KAJ6785798.1 PTLHEFGA--TFA-----QDLQEVFNKTVTAKDGDKRESN---TIFL-TIDS-DHEF 109  
KAJ6785933.1 ----QPQS---VTPKEG-I-----VE-----LASLDQIV--- 26  
KFG80340.1 QAIEQPIP--KFEPFPT-AGSNDSSSS-----AKSKRNTGGSWLNEVNVQVSDW 128  
KAJ6783033.1 QAVEQPIP--KFDPFPG-KNSTSNSKRADAQADAQAGDASASNNWGSRWLNEITVKVDDW 141  
KAJ6780076.1 WKLVP RNELPNHEPSAD-AT-KTYIRKLSIV---QTAVA-----ND----- 122  
KAJ6789215.1 YMLNPPGS--DFEPSRA-QI-QGQIKVLVIS---NVRK----- 300  
KAJ6787434.1 WMLREANS--DYEPATG-SG-KGKVKSLALK---RAGKE-----AGGSSSS 119  
KFG85702.1 WMLNPPGS--DFEPALD-DG-AAKVTSLTIK---QTGED-----NATV--- 124  
KAJ6780083.1 WMLHKPGS--HFEPRCG-PNNKNHVRSLTIT---QTGTD-----DAST--- 123

KAJ6780494.1 GDSAKSLTAEGYVLGSGKYNGHPTIVLNGVDTRGTFYAAQTLRQLVGGK----- 180  
KAJ6784096.1 TDAAGRFTHEGYSLTNNSS---GVFIAGASPLGAWWATRTVLQQAIRSQ-----TKNV 293  
KAJ6785798.1 LDAAGRSTTEGYTIVAEED---GVTIRGASSLGAWWGTRTLLQQAILGD-----K 156  
KAJ6785933.1 SSLDPTLHPEGYTIDISAA--Q-GVQIKGGS DAGLFYAKQTLRQLIPPSALRSGARGPWR 83  
KFG80340.1 SADLKHGVDES YTLTVSAS--SSTVEIAAKTVWGALHAFTTFQQLVIFEG-----GSL 179  
KAJ6783033.1 SADLKHGVDES YTVDTISS--SSQVQVTAKTAWGALHAFTTLQQMVISDG-----RGGL 193  
KAJ6780076.1 -SSLIGPSNESYSLHIETD--G-TASITAVAPSGILRALQTFTQLFYLHS---TKQGSY 174  
KAJ6789215.1 -----NSESYSLVHDGS---NAVINAESTIAVLRALETFTQLFNQHS---SGSYWY 346  
KAJ6787434.1 SRLDFAEMDES YTLDLSSS--G-DATIAANSTVGLLRGLETFTQLFYKHS---SGAAVY 172  
KFG85702.1 FKPLAGQVDES YSLHLEAN--G-EASIEAVTSTGLVRGLESFTQLFFKHS---SGDAFY 177  
KAJ6780083.1 FKPLAGQRDES YALNVTFD--G-LASIRANSSIGVMRGLETFSQLFFKHS---SGGAWY 176  
\* . \* : . . . . : . \*

KAJ6780494.1 RGVPGVKVRDWPLMPVRGSIEGFYGI PWSHQARMDQYVFGQHKNMNTYVYTPKGD PY--- 237  
KAJ6784096.1 TALPYGHRDAPGWMRGMMMLDAGRHWY PKEFLVEMCGYMSYFKQNTFHVHLSDNLVTD 353  
KAJ6785798.1 SAVPVGGQDDAPGWSTRGMMMLDCGRHFY PKQFLIDMCYSISFFKQNTFHIHLSDNITVPT 216  
KAJ6785933.1 LPAQTISDAPSSGLRWGCM LDVARHFMPVSDVLHFIDVLA FHKLNTFHFH LTTDDQGWRI 143  
KFG80340.1 IVEQPVTIKDHPNYPYRGVMVD TGRNFTSANKIKEQIDGLALSKMNILHWHITDTQSWPI 239  
KAJ6783033.1 IVEQPVKIKDHPNYPYRGVMVDSGRNFTSVNKLREQIDGLALSKMNILHWHITDDQSWPI 253  
KAJ6780076.1 TRLAPIHITDAPQFSHRGINLDVARNFY PVKDVLRTIDALAWNKFNVLHLMTDSQSWPM 234  
KAJ6789215.1 TTLAPVAIEDSPTFPHRGLIFDVSRERYSVDDVKHTIDALAMAKLNKLHLSVNTQSWQV 406  
KAJ6787434.1 TDMAPVSIRDAPVMPYRALLIDVARHWYEVADIKRTIDGLAMNKLNVLHLHITDTQSWPL 232  
KFG85702.1 TQQAPVSIQDAPRFP HRGLVL DLSRHWFAVDDIKRTIDGLAMNKMNVILH LITNTQSWPL 237  
KAJ6780083.1 TTQAPVRIADAPKFPHRGMMMLDVSRHWF AVADIKRTIDGLSMAMNVLHLHITDTQSWPL 236  
\* . . . . \* \* \*

KAJ6780494.1 LRATWRELYGGEDLDK LKELIETANANHVDFTYALSPGLDICYTSGADFNATVAKFEQLR 297  
KAJ6784096.1 YYSYEQAMALEANFRLF---SESG---ALQ-----GLSSPRDV---AYTRADFDEVQ 396  
KAJ6785798.1 YTPD-NYNETYARFRLW---SDSS---EVS-----GLNKHANE---SYTKDDFEDIQ 258  
KAJ6785933.1 DVPQWPRLAEVASSRKR---SMQGTRHDCS-----FDARPHGG---FYTADDLREIV 189  
KFG80340.1 HLEAYPQVT-KD-----AYS GRE---SYSAKDVQDII 267  
KAJ6783033.1 HIDAFPEFT-KD-----AYSERE---IYSANDVADVI 281  
KAJ6780076.1 EIPSLPDLAGKG-----AYYAGM---SYTPTDIETIQ 263  
KAJ6789215.1 EIPSFPPELTEKG-----TFYSGQ---YYSVDDLHDLY 435  
KAJ6787434.1 EIPALPLLAEKH-----RYAKGL---TYS PADLEIDIQ 261  
KFG85702.1 EIPALPKLAEGK-----RYAPGL---TYS PQAIQEIQ 266  
KAJ6780083.1 EIPALPLLAERH-----AYSKGL---TYS PADIADLH 265  
: . :

KAJ6780494.1 KLGVS SFYIALDDIPELFHCDSDKQKYPNTGNY---HWL-----ADAHAFY 340  
KAJ6784096.1 QKCAARGVTVMPEIEAPGHALRIVQWK PQLG-----FHKDPSL 434  
KAJ6785798.1 TKCAQRGVTI IPEIEAPGHCLPIVQWRPQIG-----YQGDLSL 296  
KAJ6785933.1 AFAAERHVTVVPEVNM PGHMQAAIAAYPELGNTDVEGRSPDAGVWDSWGI---SPR--V 243  
KFG80340.1 SYARARGVRV IPEIDMPGHSASGWQQIDKDIVTCQNSWWS---NDNWPLHTAVQPNPGQ 323  
KAJ6783033.1 SYARARGVRV IPEIDMPGHSASGWQQIDKDII TCENSWWS---NDNWPLHTAVQPNPGQ 337  
KAJ6780076.1 KYALHRGVT VHIEFDMPGHTTAVSWGYPELVAAAE AQPR-----G-RYCAEPPCGT 313  
KAJ6789215.1 TYAVSRGVEIVMGIDMPGHSN-IQH IY PDLGVAYMAHPW-----N-TYCSEPPCGS 484  
KAJ6787434.1 EYGAARGVQVILEIDMPGHVG-IERAYPGLSNAFAAQPW-----G-TYCAEPPCGS 310  
KFG85702.1 EYGVARGVQV LLEIDMPGHVG-IDKAYPGLSVAYNEKPY-----D-KYCAQPPCGA 315  
KAJ6780083.1 EYGIHRGVQVILEIDMPGHVG-IERAYPGLSVAYNKR PY-----G-QYCAQPPCGS 314  
\* .

KAJ6780494.1 LNRVQKEYIKAHEGLT-DL-ETVP--TNYAGSAPDPYKSEFGKQLDKNIRVQ----- 388  
KAJ6784096.1 LNISHPETIPTMKSIWQEFLPW FH---TKLVSIGADEYHGPV-ADYNR----- 478  
KAJ6785798.1 LNISHPD TIPTMKTIWKEFLPW FH---TSVVSIGADEYKGP E-EDYKR----- 340  
KAJ6785933.1 LNV-SDKTLD FCRSVLDLVC DIFP--SETV CIGGDECPYDE-WKASPSVQARMKELGIKT 299  
KFG80340.1 LDVMNPKTYQVVG NVYSEL SKKFS--DDFFHVG GDELQIGC-FNFSK GIRDWFAADPKRT 380  
KAJ6783033.1 LDVLNPKTYKTVEKVYAE LSHRFS--DDFFHVG GDELQIGC-FNFSKPIRDWFAEDSSRT 394

KAJ6780076.1 LQLNNPAVDDFLDTLFDVMPRVKSYAAFFHTGGDEVNAQA-YTLDPTMQT----NDRSK 368  
 KAJ6789215.1 YRLNNTGVDRFLEKLFEDLLPRIAPYASHFHTGGDEYNANN-CALDPDIRS----GEMSV 539  
 KAJ6787434.1 LKLNNTDVYKFLDTLFDLLPRTAPYSSYFHTGGDEYKASN-SLLDPALRT----DDTSV 365  
 KFG85702.1 LKLNNTDVENFISTLFDLLPRLSPYSAYFHTGGDEYKATN-SLLDPDLQT----DNMTL 370  
 KAJ6780083.1 LRLGNKKVEEFLDTLFDLLPRLSPYTAYFHTGGDEYKANN-SLLDSDLQT----NDPAI 369  
 : . \* .  
  
 KAJ6780494.1 -WTGEGVFSDKITVDSVVRADSTYVTDKLFIVDNFPVN-DNKPFR-----F 433  
 KAJ6784096.1 -----FVNTMND-FIR-----EQSNKTMISIWGTFPPK-YDGTYNINQNVAIQHWEFFE 525  
 KAJ6785798.1 -----FVNEMSA-FMN-----EEASKSIRIWGTFPAVKHAGSPTTIDSNITIQHWAYLF 388  
 KAJ6785933.1 ESALQGWFTDRMA-----AHLATRGKRAYGWDEVIEG-YTGP---TEKILVAAWRG-- 346  
 KFG80340.1 YFDLNLQYWDHAYPLFMSEENSGKKDRRLIMWEDVVLS-PDAHAHNVS KSVIMQSWNNG- 438  
 KAJ6783033.1 YFDLNLQHWIDTSMPIFTSEKNTGKKNRRLIMWEDVVLS-PDAAAHNVSKDVIMQSWNNG- 452  
 KAJ6780076.1 IRAQIQKMVDRNH-----AHVRKAGLTPIVWEEMLLE-WNLT--L-PLDVVVQTVRG-- 416  
 KAJ6789215.1 VQPLMQKFVQNVH-----KIIRKRGTPVWVEETINV-WNVT--L-PKDTLVQSWRG-- 587  
 KAJ6787434.1 LKPLLHAFLOHVVH-----GKIRQHGMTPFVWEEMVQG-WGAP--LPTNDTIIQTWFG-- 414  
 KFG85702.1 LQPLLQRFDLHAH-----NNIRGHGLVPIVWEEMVEE-WAAD--V-GNDTVVQAWLG-- 418  
 KAJ6780083.1 LQPLLQRFDLHAH-----GKIRELGLVPMVWEEMINE-WNAT--V-GKDVVVQSWFG-- 417  
 : \*  
  
 KAJ6780494.1 LNPLTERATDLYKHMIGFTSNPMVQSYASMIALGNYGD----- 471  
 KAJ6784096.1 DKPLTDYIQNNYSVINSDDTY-----YVVKYSESYPALPLDKTFSADPSVPGGGP--- 577  
 KAJ6785798.1 DNPYEDYIKNNYSVINSDEMY-----YIVMKDG-PYGRKINTDITFTGN--PDGHGP-- 437  
 KAJ6785933.1 PGPTAIAARRGFDVVTCPDVN-----AYLDYRQSD-----D-----PGEPTPVGI----- 386  
 KFG80340.1 VANIDKLTAKAGYDIVSSADF-----MYLDCGNGGYVTNDPRYNAPQSNPDATGATFSFN 493  
 KAJ6783033.1 ITNIGKLTQGYDIVSSADF-----LYLDCGFGGYVTNDPRYNV-QENPDPTGATPSFN 506  
 KAJ6780076.1 DAAIAETVKQGYKALVGNKAS-----WYLNCGMGSWYNAAN-----GAEFK 457  
 KAJ6789215.1 GAT-PSLAKAGYKVIDSSSY-----YYLNCGRGAFVDYQD-----GSSLQ 627  
 KAJ6787434.1 AESVQKYARAGYRVIDTSYDA-----YYLDCGRGSWVDYAD-----SAV-S 454  
 KFG85702.1 SASVAKLAAAGHKVIDSTFDI-----YYLDCGRGQWLDFKD-----GPSLD 459  
 KAJ6780083.1 QDKVKELAEAGHKVIVSSSDS-----YYLDCGRGEFIDYEN-----GPDFQ 458  
 . :  
  
 KAJ6780494.1 -----YSWNSPAYNPQDSWAAVI-----QELAGKDQGIHSALLA----FADINQ 511  
 KAJ6784096.1 -----WYPHVFNAKKA-----SDNPQRSEPRVLGSIVPLWNDFGQONATVASEAYY 622  
 KAJ6785798.1 -----WYPNIFNLNSNP-----NSNPSKNNKLIQGAISPLWNHDGANTSVYSEAYY 482  
 KAJ6785933.1 -----LLTLENVYSFEPVPAGLTPEE-ARHIVGAQVNVVVEHMESARRVQ--YM 432  
 KFG80340.1 YGGPGGSWCAPYKTWQRIYDYDFTA-NLTSQ-AKHIIIGAAAPLWSEQVDDA-VIS--SK 548  
 KAJ6783033.1 YGGIGGSWCAPYKTWQRIYDYDFTQ-GLSEAQ-AKHIIIGASAPLWSEQVDDT-IIS--GK 561  
 KAJ6780076.1 QQYPFNDYCSFVKNWRLVYAFDPLA-GVPANL-TDLVLGGEVHLWSEQADGV-NVD--GL 512  
 KAJ6789215.1 NAYPFTDWCAPAKNWRVVMHTPTD-GVDARH-AQNVVVGGEVAIFSETVDAA-SLD--VI 682  
 KAJ6787434.1 PGTTFNWSCDPFKNWHIVYNHDPFA-GLEGSAAAKKVVGGEVALWSETIDGA-TFD--QI 510  
 KFG85702.1 AAYPFADYCSPTKNWRLIYSHDPVE-NMTAEA-AANVIGGEVAVWTEMIDPV-SLD--TL 514  
 KAJ6780083.1 GAYPFTDWCAPTKNWRLIYAQDPRA-GVSEEA-AENVIGGELPLWTETIDTT-SLD--SI 513  
 . : \* :  
  
 KAJ6780494.1 NWPYRNNTESAPQLSKDIDAFWAARKSSQKQSDSALASRLTLIA-SIPDLLPG----- 563  
 KAJ6784096.1 AWREG-----LPAVADKQWGGTLNRAQFDVFPQVQPYAPGQNLDRAPSPAGETIL 674  
 KAJ6785798.1 AWRDG-----IPALADKHGNGNLTDQDQYSNWFSKLLAKIPAQTLERRIPSNQ-NTIF 533  
 KAJ6785933.1 VYPR-----ACAFAEVAWGKTKEHGSF---EDFRKRLEDKHLARLD-----AL 472  
 KFG80340.1 MWPR-----AAALAEVLWSGNKDPKTGLKRTTYLTQRILN----- 583  
 KAJ6783033.1 MWPR-----AAALGELTWSGNKDPKTGKKRTTFTQRIILN----- 596  
 KAJ6780076.1 LWPR-----AAAAAEVLWSGRHDAGGQNRSQVDAAPRLAE----- 547  
 KAJ6789215.1 LWPR-----AAAAGEIWWSGRKDENGTDRSVWHARPRLSE----- 717  
 KAJ6787434.1 AWPR-----ASAGGEIWWSGRKDASGNLRSQYHARPRLAE----- 545  
 KFG85702.1 AWPR-----AAAAGEAWWSGRKDEGNLRSVFTARPRLEE----- 549  
 KAJ6780083.1 VWPR-----AAAAGESWWSGRYDADGKNRSMYDARPRLSE----- 548  
 : : \*  
  
 KAJ6780494.1 -MAMKPF----AADVAPWSTVAMQWAKASQHMISMIAAIDAGDKST-ADSEY----- 609  
 KAJ6784096.1 QYNFASIPGHVVKDASGNHDAKTTCTMDRTALAIRPGCDVTLFPGAKGRDYTLSTLVKL 734  
 KAJ6785798.1 SYDLRKVKGDSVADKSGNKYDAKTTCKGADDGIAMSTDCDITPWSKGRNYKLSLTLNM 593  
 KAJ6785933.1 HVNYRP---QTGPRPWDGRPDAGPYQPSREHR-----LAEIEKM-----TAELRL 514  
 KFG80340.1 ---FRE---YLVANGIGAAPLVPKYCLQHPH-----ACDLYYN-----QTAVQ- 620  
 KAJ6783033.1 ---FRE---YLVANGIGATPLVPKYCFQHPH-----ACDLYYD-----QEAVK- 633  
 KAJ6780076.1 ---MRE---RMVLGGVQAGPVQMFCTQKDAR-----ECIF----- 577  
 KAJ6789215.1 ---MRH---RMLARGVKGATVTHTWCEQHAE-----ECTSGYS-----G----- 751  
 KAJ6787434.1 ---MRE---RMLARGIVGGTIAPGFCLQSELG-----ACV----- 574  
 KFG85702.1 ---MRE---RMLARGVRGAVISQLFCGQSPLE-----DCAA----- 579

|              |                                                                |           |
|--------------|----------------------------------------------------------------|-----------|
| KAJ6780083.1 | ---MRE---RMLARGVRGAPITQLWCDQADTI-----DCSSE-----                | 579       |
|              |                                                                |           |
| KAJ6780494.1 | -----NAAQEWVEKTKAKTVSSLRDD                                     | 630       |
| KAJ6784096.1 | DQDMRGQNATILTGTDSALLLTPTLTLYASNYYPLNLTIPVNRWVDI-----           | TIRGK 787 |
| KAJ6785798.1 | DKLTDETNTTLVAGSDSTLMLTPNVTLFASGIYYRLNKTIPLQSWVRL-----          | EINGD 646 |
| KAJ6785933.1 | -----                                                          | 514       |
| KFG80340.1   | -----                                                          | 620       |
| KAJ6783033.1 | -----                                                          | 633       |
| KAJ6780076.1 | -----                                                          | 577       |
| KAJ6789215.1 | -----                                                          | 751       |
| KAJ6787434.1 | -----                                                          | 574       |
| KFG85702.1   | -----                                                          | 579       |
| KAJ6780083.1 | -----                                                          | 579       |
|              |                                                                |           |
| KAJ6780494.1 | GKVVPNSITPTTGDGVFDAFIANATALYNDQ-----                           | 661       |
| KAJ6784096.1 | GNQTFGAMKPA--GGFFEEEFQTMGI VGKRLHWDTI AVEAPLGKLG GFTGMLRNLT LT | 845       |
| KAJ6785798.1 | GPKTFASAFNEKGDII FSKEEFLEMSY YGQPLRWHEMAIEAPIHQITGWQGKVRDFTLT  | 706       |
| KAJ6785933.1 | -----                                                          | 514       |
| KFG80340.1   | -----                                                          | 620       |
| KAJ6783033.1 | -----                                                          | 633       |
| KAJ6780076.1 | -----                                                          | 577       |
| KAJ6789215.1 | -----                                                          | 751       |
| KAJ6787434.1 | -----                                                          | 574       |
| KFG85702.1   | -----                                                          | 579       |
| KAJ6780083.1 | -----                                                          | 579       |
|              |                                                                |           |
| KAJ6780494.1 | -----                                                          | 661       |
| KAJ6784096.1 | NRG-----                                                       | 848       |
| KAJ6785798.1 | TDGMGDKPGDSFATRGLPSAPILIAALVALCLGL                             | 741       |
| KAJ6785933.1 | -----                                                          | 514       |
| KFG80340.1   | -----                                                          | 620       |
| KAJ6783033.1 | -----                                                          | 633       |
| KAJ6780076.1 | -----                                                          | 577       |
| KAJ6789215.1 | -----                                                          | 751       |
| KAJ6787434.1 | -----                                                          | 574       |
| KFG85702.1   | -----                                                          | 579       |
| KAJ6780083.1 | -----                                                          | 579       |

**Figure S3. Clustal alignment of *A. album* GH20 enzymes.** The nine sequences were aligned together with the GH20  $\beta$ -N-acetylhexosaminidases identified in *M. anisopliae* (KFG803409 and KFG85702). Boxed sequences correspond to the conserved motif H(N)XGA(C/G/M)DEA(I/L/V/Y), typical of GH20 sequences.

## Figure S4

|              |                                                              |     |
|--------------|--------------------------------------------------------------|-----|
| KAJ6781485.1 | -----                                                        | 0   |
| BAD08218.2   | -----                                                        | 0   |
| ADG96019.1   | -----                                                        | 0   |
| BAA92250.1   | -----                                                        | 0   |
| ABZ88800.1   | -----                                                        | 0   |
| EAL84291.1   | -----                                                        | 0   |
| AAO41660.1   | -----                                                        | 0   |
| CAE54966.1   | -----                                                        | 0   |
| AJG44374.1   | -----                                                        | 0   |
| KAJ6787168.1 | -----                                                        | 0   |
| ABY77913.1   | -----                                                        | 0   |
| KAJ6783315.1 | -----                                                        | 0   |
| AFG33049.1   | -----                                                        | 0   |
| KAJ6786595.1 | -----                                                        | 0   |
| KAJ6788818.1 | -----                                                        | 0   |
| ABX57824.1   | -----                                                        | 0   |
| BAA12799.1   | -----                                                        | 0   |
| KAJ6781651.1 | -----                                                        | 0   |
| KAJ6785337.1 | MLSEFEGDDADSDVDSAAAMATILWGRAVEQEDDILLWSLSSILNLHELGLASSHELZIA | 60  |
| KAJ6783761.1 | -----                                                        | 0   |
|              |                                                              |     |
| KAJ6781485.1 | -----                                                        | 0   |
| BAD08218.2   | -----                                                        | 0   |
| ADG96019.1   | -----                                                        | 0   |
| BAA92250.1   | -----                                                        | 0   |
| ABZ88800.1   | -----                                                        | 0   |
| EAL84291.1   | -----                                                        | 0   |
| AAO41660.1   | -----                                                        | 0   |
| CAE54966.1   | -----                                                        | 0   |
| AJG44374.1   | -----                                                        | 0   |
| KAJ6787168.1 | -----                                                        | 0   |
| ABY77913.1   | -----                                                        | 0   |
| KAJ6783315.1 | -----                                                        | 0   |
| AFG33049.1   | -----                                                        | 0   |
| KAJ6786595.1 | -----                                                        | 0   |
| KAJ6788818.1 | -----                                                        | 0   |
| ABX57824.1   | -----                                                        | 0   |
| BAA12799.1   | -----                                                        | 0   |
| KAJ6781651.1 | -----                                                        | 0   |
| KAJ6785337.1 | GPPASMAETAPIFAPSSFDAIQVKINSIGHLHSYLSQLLAHDPSYHSNFEQGLVESALS  | 120 |
| KAJ6783761.1 | -----                                                        | 0   |
|              |                                                              |     |
| KAJ6781485.1 | -----                                                        | 0   |
| BAD08218.2   | -----                                                        | 0   |
| ADG96019.1   | -----                                                        | 0   |
| BAA92250.1   | -----                                                        | 0   |
| ABZ88800.1   | -----                                                        | 0   |
| EAL84291.1   | -----                                                        | 0   |
| AAO41660.1   | -----                                                        | 0   |
| CAE54966.1   | -----                                                        | 0   |
| AJG44374.1   | -----                                                        | 0   |
| KAJ6787168.1 | -----                                                        | 0   |
| ABY77913.1   | -----                                                        | 0   |
| KAJ6783315.1 | -----                                                        | 0   |
| AFG33049.1   | -----                                                        | 0   |
| KAJ6786595.1 | -----                                                        | 0   |
| KAJ6788818.1 | -----                                                        | 0   |
| ABX57824.1   | -----                                                        | 0   |
| BAA12799.1   | -----                                                        | 0   |
| KAJ6781651.1 | -----                                                        | 0   |
| KAJ6785337.1 | ARTAIMFSVTYFQQSHRYISLVHRPFSQDSTALLLAVAFAGSTRSPKDDVLCVRS      | 180 |
| KAJ6783761.1 | -----                                                        | 0   |
|              |                                                              |     |
| KAJ6781485.1 | -----                                                        | 0   |

|              |                                                              |     |
|--------------|--------------------------------------------------------------|-----|
| BAD08218.2   | -----                                                        | 0   |
| ADG96019.1   | -----                                                        | 0   |
| BAA92250.1   | -----                                                        | 0   |
| ABZ88800.1   | -----                                                        | 0   |
| EAL84291.1   | -----                                                        | 0   |
| AAO41660.1   | -----                                                        | 0   |
| CAE54966.1   | -----                                                        | 0   |
| AJG44374.1   | -----                                                        | 0   |
| KAJ6787168.1 | -----                                                        | 0   |
| ABY77913.1   | -----                                                        | 0   |
| KAJ6783315.1 | -----                                                        | 0   |
| AFG33049.1   | -----                                                        | 0   |
| KAJ6786595.1 | -----                                                        | 0   |
| KAJ6788818.1 | -----                                                        | 0   |
| ABX57824.1   | -----                                                        | 0   |
| BAA12799.1   | -----                                                        | 0   |
| KAJ6781651.1 | -----                                                        | 0   |
| KAJ6785337.1 | ARLLEEFVFOHLERLIVNANSMNRSRELLETLAAAILVYQIQFMSMAAAALQRMRTSRLP | 240 |
| KAJ6783761.1 | -----                                                        | 0   |

|              |                                                             |     |
|--------------|-------------------------------------------------------------|-----|
| KAJ6781485.1 | -----                                                       | 0   |
| BAD08218.2   | -----                                                       | 0   |
| ADG96019.1   | -----                                                       | 0   |
| BAA92250.1   | -----                                                       | 0   |
| ABZ88800.1   | -----                                                       | 0   |
| EAL84291.1   | -----                                                       | 0   |
| AAO41660.1   | -----                                                       | 0   |
| CAE54966.1   | -----                                                       | 0   |
| AJG44374.1   | -----                                                       | 0   |
| KAJ6787168.1 | -----                                                       | 0   |
| ABY77913.1   | -----                                                       | 0   |
| KAJ6783315.1 | -----                                                       | 0   |
| AFG33049.1   | -----                                                       | 0   |
| KAJ6786595.1 | -----                                                       | 0   |
| KAJ6788818.1 | -----                                                       | 0   |
| ABX57824.1   | -----                                                       | 0   |
| BAA12799.1   | -----                                                       | 0   |
| KAJ6781651.1 | -----                                                       | 0   |
| KAJ6785337.1 | ALISAARKMGLFTTKHKAGLGSVVISADLSLTPHMATALFTAVARWQKLWQENLRALSG | 300 |
| KAJ6783761.1 | -----                                                       | 0   |

|              |                                                              |     |
|--------------|--------------------------------------------------------------|-----|
| KAJ6781485.1 | -----                                                        | 0   |
| BAD08218.2   | -----                                                        | 0   |
| ADG96019.1   | -----                                                        | 0   |
| BAA92250.1   | -----                                                        | 0   |
| ABZ88800.1   | -----                                                        | 0   |
| EAL84291.1   | -----                                                        | 0   |
| AAO41660.1   | -----                                                        | 0   |
| CAE54966.1   | -----                                                        | 0   |
| AJG44374.1   | -----                                                        | 0   |
| KAJ6787168.1 | -----                                                        | 0   |
| ABY77913.1   | -----                                                        | 0   |
| KAJ6783315.1 | -----                                                        | 0   |
| AFG33049.1   | -----                                                        | 0   |
| KAJ6786595.1 | -----                                                        | 0   |
| KAJ6788818.1 | -----                                                        | 0   |
| ABX57824.1   | -----                                                        | 0   |
| BAA12799.1   | -----                                                        | 0   |
| KAJ6781651.1 | -----                                                        | 0   |
| KAJ6785337.1 | KAIKKGGIEKYPTCSFFCIWAENQTTTPSCQQNILNTKLKSKAKAALSAIANYPQLHLEL | 360 |
| KAJ6783761.1 | -----                                                        | 0   |

|              |       |   |
|--------------|-------|---|
| KAJ6781485.1 | ----- | 0 |
| BAD08218.2   | ----- | 0 |
| ADG96019.1   | ----- | 0 |
| BAA92250.1   | ----- | 0 |

|              |                                                                   |
|--------------|-------------------------------------------------------------------|
| ABZ88800.1   | -----0                                                            |
| EAL84291.1   | -----0                                                            |
| AAO41660.1   | -----0                                                            |
| CAE54966.1   | -----0                                                            |
| AJG44374.1   | -----0                                                            |
| KAJ6787168.1 | -----0                                                            |
| ABY77913.1   | -----0                                                            |
| KAJ6783315.1 | -----0                                                            |
| AFG33049.1   | -----0                                                            |
| KAJ6786595.1 | -----0                                                            |
| KAJ6788818.1 | -----0                                                            |
| ABX57824.1   | -----0                                                            |
| BAA12799.1   | -----0                                                            |
| KAJ6781651.1 | -----0                                                            |
| KAJ6785337.1 | DLASSTSIMTFAAEFAKQFNGQINIFIKNPGGVDPDNHDHSEDGYERQFSMNYLGQFQLFS 420 |
| KAJ6783761.1 | -----0                                                            |

|              |                                                                  |
|--------------|------------------------------------------------------------------|
| KAJ6781485.1 | -----0                                                           |
| BAD08218.2   | -----0                                                           |
| ADG96019.1   | -----0                                                           |
| BAA92250.1   | -----0                                                           |
| ABZ88800.1   | -----0                                                           |
| EAL84291.1   | -----0                                                           |
| AAO41660.1   | -----0                                                           |
| CAE54966.1   | -----0                                                           |
| AJG44374.1   | -----0                                                           |
| KAJ6787168.1 | -----0                                                           |
| ABY77913.1   | -----0                                                           |
| KAJ6783315.1 | -----0                                                           |
| AFG33049.1   | -----0                                                           |
| KAJ6786595.1 | -----0                                                           |
| KAJ6788818.1 | -----0                                                           |
| ABX57824.1   | -----0                                                           |
| BAA12799.1   | -----0                                                           |
| KAJ6781651.1 | -----0                                                           |
| KAJ6785337.1 | MLKDALLSSATAASPSRLINVSSTRHKRGPITDFGIINVKKEDYDAFDSYCQSKTAAVYL 480 |
| KAJ6783761.1 | -----0                                                           |

|              |                                                                 |
|--------------|-----------------------------------------------------------------|
| KAJ6781485.1 | -----0                                                          |
| BAD08218.2   | -----0                                                          |
| ADG96019.1   | -----0                                                          |
| BAA92250.1   | -----0                                                          |
| ABZ88800.1   | -----0                                                          |
| EAL84291.1   | -----0                                                          |
| AAO41660.1   | -----0                                                          |
| CAE54966.1   | -----0                                                          |
| AJG44374.1   | -----0                                                          |
| KAJ6787168.1 | -----0                                                          |
| ABY77913.1   | -----0                                                          |
| KAJ6783315.1 | -----0                                                          |
| AFG33049.1   | -----0                                                          |
| KAJ6786595.1 | -----0                                                          |
| KAJ6788818.1 | -----0                                                          |
| ABX57824.1   | -----0                                                          |
| BAA12799.1   | -----0                                                          |
| KAJ6781651.1 | -----0                                                          |
| KAJ6785337.1 | ASEMERRYGAPRIFTDVAEAAISSDVLHKDMRGRYLEDFVFSIPAAETKYPDILGYAHT 540 |
| KAJ6783761.1 | -----0                                                          |

|              |                         |
|--------------|-------------------------|
| KAJ6781485.1 | -----MLVKSI-----ASLA 10 |
| BAD08218.2   | -----MPIKSF-----ASRL 10 |
| ADG96019.1   | -----MMTY-----SRLI 8    |
| BAA92250.1   | -----M---H-----FAGI 6   |
| ABZ88800.1   | -----M---R-----LSEI 6   |
| EAL84291.1   | -----M---R-----LSEI 6   |
| AAO41660.1   | -----M---R-----LSEI 6   |

|              |                                                                 |
|--------------|-----------------------------------------------------------------|
| CAE54966.1   | -----M---R-----LSEI 6                                           |
| AJG44374.1   | -----MR---Y-----LATA 7                                          |
| KAJ6787168.1 | -----M---L-----FSL 6                                            |
| ABY77913.1   | -----0                                                          |
| KAJ6783315.1 | -----MR---S-----ATVI 7                                          |
| AFG33049.1   | -----MKTAA-----ITSL 9                                           |
| KAJ6786595.1 | -----0                                                          |
| KAJ6788818.1 | -----MASL-----RSTL 8                                            |
| ABX57824.1   | -----MPSL-----RNTL 8                                            |
| BAA12799.1   | -----MPSL-----RNTL 8                                            |
| KAJ6781651.1 | -----MKTT-----ASIL 8                                            |
| KAJ6785337.1 | YDEQRAKDLWKFTKELLGHD TGLFPYAFTSFNTVAAQYRDIPDMMRVTT-----KIAL 593 |
| KAJ6783761.1 | -----MK-----ASLA 6                                              |

|              |                                                                 |
|--------------|-----------------------------------------------------------------|
| KAJ6781485.1 | ALSGIAAAAGPIRASVPTNVDGSKYN---KPNAGPPGDWFSGDSSLPISKIASA---V-S 63 |
| BAD08218.2   | A-LSLA----ICGTAMGQKVNGADYN---KPDGGPPAKFFQASSSIPVAAIQAA---A-A 58 |
| ADG96019.1   | PFALFA---LFGTGLAQTVDGSKFN---KPDGGPPGSYFAAGSSIPVAALQSA---A-A 57  |
| BAA92250.1   | VAIALA--TGATAYDLPENLKQ-IYE---KH-K-GKCSK-----ELQGG---YDN 46      |
| ABZ88800.1   | LTVALV--TGATAYNLPNNLEQ-IYD---KH-K-GKCSK-----VLAKG---FTN 45      |
| EAL84291.1   | LTVALV--TGATAYNLPNNLKQ-IYD---KH-K-GKCSK-----VLAKG---FTN 45      |
| AAO41660.1   | LTVALV--TGATAYNLPNNLKQ-IYD---KH-K-GKCSK-----VLAKG---FTN 45      |
| CAE54966.1   | LTVALV--TGATAYNLPNNLKQ-IYD---KH-K-GKCSK-----ILAKG---FTN 45      |
| AJG44374.1   | AVLAGA--GLASAYSVPANLQQ-IYN---KH-KTGTQCN-----KLQDG---FSD 47      |
| KAJ6787168.1 | TVAALG--AVASAYDLPDNLRS-LYQ---AH-INGECRS-----ALSDP---FNT 46      |
| ABY77913.1   | -----YQLPANLKK-IYD---SH-KSGTCSK-----KLSSA---FSG 29              |
| KAJ6783315.1 | TLAALG--SLASGYQLPAKLKS-LYD---QH-KSGSCSK-----KLAGP---FNG 47      |
| AFG33049.1   | AVAALA--APALAYDIPDNVQA-FYD---KVKKGDDCTG-----SDLLKGG---FYA 52    |
| KAJ6786595.1 | -----MRA-LVN---I-----TW-----HIVGAQLARNA 20                      |
| KAJ6788818.1 | LLSL-A--AVAAARDVPSNVRD-FYN---SVRGKQCSN-----KLKSG---FHS 48       |
| ABX57824.1   | LASLLA--ASVSARDVPANVKS-FKD---SIKQGSCKS-----TLATG---FYS 49       |
| BAA12799.1   | LASLLA--ASVSGRDVPANVKT-FKD---SIKQGSCKS-----TLATG---FYS 49       |
| KAJ6781651.1 | FASLLA--SPVLGRQVPQNVVD-LYN---SIRAQKSCHN-----ELKGG---FYS 49      |
| KAJ6785337.1 | TASLLA--LNSYARDVPSNIRD-LYN---SIRARGQCSN-----VLKGG---FYS 634     |
| KAJ6783761.1 | IISLLA--TGALSREV PANVKS-LYK---SIRSKGQCSK-----VLKTG---FFS 47     |

: . :

|              |                                                      |                       |
|--------------|------------------------------------------------------|-----------------------|
| KAJ6781485.1 | KMSKTPKDASYILSND-NHKKATIHSDWANLSKGA-AYAFVADMDVDCDGI  | IDSH-----115          |
| BAD08218.2   | KASKVP SHATYPIG--QGSTKSTIHSDWAGFSEGA-AFSFIADMDVDCDGI | LNHG-----109          |
| ADG96019.1   | KARTPVPDATYPINGDNGAKKVTIHSDWAKFDKGA-AYVWIAADMDVDCDGI | IDYK-----110          |
| BAA92250.1   | GHS HDGKSFSY--CGDIP-----NAIYLHSSKNGGQYADMDIDCDG      | ANRH---AGK 92         |
| ABZ88800.1   | GDASQGKSFSY--CGDIP-----GAIFISSK--GYTNMDIDCDG         | ANNS---AGK 88         |
| EAL84291.1   | GDASQGKSFSY--CGDIP-----GAIFISSK--GYTNMDIDCDG         | ANNS---AGK 88         |
| AAO41660.1   | GDASQGKSFSY--CGDIP-----GAIFISSK--GYTNMDIDCDG         | ANNS---AGK 88         |
| CAE54966.1   | GDASQGKSFSY--CGDIP-----GAIFISSK--GYTNMDIDCDG         | ANNS---AGK 88         |
| AJG44374.1   | GISGPGT-SAY--CGDIQ-----GAIFLHSSANGGQYDNMDIDCDG       | ANNS---GGD 92         |
| KAJ6787168.1 | G-----AVY--CGDIP-----NAIFLKG--PNGEYDNMDIDCDG         | ANNS---AGD 83         |
| ABY77913.1   | G-----AVY--CGDLP-----NAIFLKG--KAGNYDNLDIDCDG         | ANNS---AGE 66         |
| KAJ6783315.1 | G-----ASY--CGDIN-----GAIFLKG--N-GNYDNMDIDCDG         | ANRT---GGA 83         |
| AFG33049.1   | -EEGGSKNFGY--CQKYF-----TNKG-FY LKG--SGSKLADMDIDCDG   | QDQG--IDSR 98         |
| KAJ6786595.1 | -DQITRADMSY--CGDHL-----DDLGVVYLQG--P-GKFS            | DMDVDCDGAQGGPQDDGR 68 |
| KAJ6788818.1 | -IEGDDGSFSY--CGDHL-----NDYRVLYLQG--KGGQLVNMDIDCDG    | IQHGPADDGR 97         |
| ABX57824.1   | -SDGDSGTYSY--CGDHV-----KDY NVIYLQG--KNGKLVNMDIDCDG   | IQGSPADDGR 98         |
| BAA12799.1   | -SDGDSGTYSY--CGDHV-----KDY NVIYLQG--KNGKLVNMDIDCDG   | VQGSPADDGR 98         |
| KAJ6781651.1 | -QEGDSKNFGY--CGDHL-----SDYGIMYLQG--KNGQLVNMDIDCDG    | ALGD--GDGS 96         |
| KAJ6785337.1 | -QEKDSKDFCY--CGDHL-----ASDGIVYLQG--THGNLVNMDIDCDG    | ALGE--GDGS 681        |
| KAJ6783761.1 | -SEDDSKDFSY--CGDHL-----ESDGILYIQG--KGGKLTNMDIDCDG    | ILSK--KHGE 94         |

\* . ::::\*\*\*

|              |                                                                     |
|--------------|---------------------------------------------------------------------|
| KAJ6781485.1 | CKGNDD--GETHTDFG-----ALAA YEVPFVVIPNKFASEHEK-----ELAG 155           |
| BAD08218.2   | CKGNPD--GQKETNWG-----ALSAYEVPFIVIPQEF LDANKG-----TLKG 149           |
| ADG96019.1   | CKGNPD--GQHQTNGF-----ALAA YEVPFVVIPDRFGTKYAK-----QLPG 150           |
| BAA92250.1   | CSNDHS--GQGETRWKDEVQKL--GIDDL DANIHPYVVFNGNDDGD DPEFDPRKHGM EP 148  |
| ABZ88800.1   | CANDPS--GQGETAFKSDVKKF--GISDL DANIHPYVVFNGNED---HSPKFKPQSHGMQ P 141 |
| EAL84291.1   | CANDPS--GQGETAFKSDVKKF--GISDL DANIHPYVVFNGNED---HSPKFKPQSHGMQ P 141 |
| AAO41660.1   | CANDPS--GQGETAFKSDVKKF--GISDL DANIHPYVVFNGNED---HSPKFKPQSHGMQ P 141 |
| CAE54966.1   | CANDPS--GQGETAFKSDVKKF--GISDL DANIHPYVVFNGNED---HSPKFKPQSHGMQ P 141 |

AJG44374.1 CANDPS--GQSMATFMDTVKQY--GISDLNANIHPYVVFNGSG---SSPTFDPQQYGMQP 145  
 KAJ6787168.1 CANDPS--GQGQTSFVDTVSTF--GIQDLNANLHSYVVFNGEG---DSPSFSPQNHGVQP 136  
 ABY77913.1 CANDPS--GQGQTAFKDDVKKY--GIPDLNANLHPYVVFNGEE---HSPSFDPEAHGMR 119  
 KAJ6783315.1 CANDPS--GQGETSFKDTVKTY--GIPDLNANVHPYIVFGNEG---ASPSFNPQAHGIKP 136  
 AFG33049.1 CDSSGD--TQPDATAFKDQVKS--DYGIPDLRADIHPYVVLGNYG DY--SPTFDPPEHVGIKP 153  
 KAJ6786595.1 CDASTD--TQDTT AIRWVIEGYDVGISDLNPHEHSFVVFNGSGTRPGWKTFSRDPVGVPEP 126  
 KAJ6788818.1 CGSSGD--TQSITSFQGT VQGYGTGQKDLDAFIHPYVVFNGEGSKSGYPNFPQDYGVEP 155  
 ABX57824.1 CGSSGD--TQSITSFQWVLESYGT SQKDLNANIHPYIVFGNEGTKSGWKTDFDPEKHGIKP 156  
 BAA12799.1 CGSSGD--TQSITSFQWVLESYGT SQKDLNANIHPYIVFGNEGTKKGWKTDFDPEKHGIKP 156  
 KAJ6781651.1 CDSSTD--TQGQTT FQGDVEGYGKGIKDLNAYIHSFVVLGNDSKNGYVTFKPEQYGVPEP 154  
 KAJ6785337.1 CDSSTD--TQGQTT FGDIVKGYKKGIKDLNAYIHSFVVLGNEGKKGYVEFDPQSVGIEP 739  
 KAJ6783761.1 CDSSGD--IQYETRF RKEVQGYKGLKDLDAYVHSYVVLGNEGKKNYIEFNPPQSVGIEP 152  
 \* . . : \* \* :. \*: : :  
  
 KAJ6781485.1 NNLVAVICNGKL-----Y YGVFGD TDGDS PQ--EIGEASWLMANTCFPG EGLNGG---- 203  
 BAD08218.2 NAVAAVICNGKM-----F YGIFGD SNGDS PQ--VTGEASWLMARTCFPKEDLNGN---- 197  
 ADG96019.1 NNVGAVICNGKM-----F YGIYGD SDGDT PQ--VIGEASWLMARTCFPNDDLNGN---- 198  
 BAA92250.1 LSVMAVVCNKKL-----F YGIWGD TNGHT----ATGEASLSMAELCFPEEDPSGD---- 194  
 ABZ88800.1 LSVMAVVCNGQL-----H YGIWGD TNGGV----STGEASISLADLCFNEHLDGN---- 187  
 EAL84291.1 LSVMAVVCNGQL-----H YGIWGD TNGGV----STGEASISLADLCFNEHLDGN---- 187  
 AAO41660.1 LSVMAVVCNGQL-----H YGIWGD TNGGV----STGEASISLADLCFNEHLDGN---- 187  
 CAE54966.1 LSVMAVVCNGQL-----H YGIWGD TNGGV----STGEASISLADLCFNEHLDGN---- 187  
 AJG44374.1 LSVMAVVCNNQL-----F YGVWGD TNGDI----ATGEASISLAKLCFNDGITGD---- 191  
 KAJ6787168.1 LSVMAVVCNNQV-----F YGVWGD TNGFT----STGEASLALAKLCFNDGLNGD---- 182  
 ABY77913.1 LSVMAIVCNNQV-----F YGIWGD TNGGT----STGEASLALGKLRFPNDGLNGD---- 165  
 KAJ6783315.1 LSVMAVVCNGQL-----H YGIWGD TNGFT----STGEASLSMGKLCFNEHLTGN---- 182  
 AFG33049.1 LSLVAVVCNNKL-----I YGIWGD TNGDDGP-PLIGESSLAVGTACFGD-SINGD---- 201  
 KAJ6786595.1 ASLMAVICGDQMSARIKF YGIWGD SNTDDGPRPSVGEVSISLGTACYGK-HMQAGTGSD 185  
 KAJ6788818.1 LSVMAVVCNKL-----I YGIWGD TNGDDGPQAMVGEASISLATA CYGN-GINGN---- 204  
 ABX57824.1 LSVMAVVCNKM-----F YGIWGD ENGDDGDYPMVGEASISLATA CYGK-SMNGN---- 205  
 BAA12799.1 LSVMAVVCNKM-----F YGIWGD ENGDDGDQPMVGEASISLATA CYGK-SMNGN---- 205  
 KAJ6781651.1 LSLVAVVCGDKM-----F YGVWGD TNGDDGP-PLVGEVSDSLGRACYGN-AVNGN---- 202  
 KAJ6785337.1 LSI VAVVCGDRL-----L YGVWGD TNGDDGP-PLIGEVS DSLGRACYGD-EVNGN---- 787  
 KAJ6783761.1 LSVVAVVCGDKM-----F YGVWGD TNGDDGP-PLVGEASLTIGQACYGK-SINGN---- 200  
 : \*: . : : \*\* : : : \* \* \* : . : :  
  
 KAJ6781485.1 QGHSDADVITYIFFTGDDSVLPD NAI---GKNYLTNFQALKNLGDKLMRDLVSSLHL---- 256  
 BAD08218.2 KGHTAADVITYIVFTGDKAVLPSSAL---NKNYITNFDTLRSMGDSL VGALAKNLNLGGGG 254  
 ADG96019.1 SGHGDVDVITYILFTGDDSVLPSSAL---NKNYVTNFTTLRSMGDKLMTALAKNLKLV DGG 255  
 BAA92250.1 SGHEPNVDVLYIGFTGKEAVPGKS-ADWKADSTESFEESIKELGDKLVAGLK-----A- 245  
 ABZ88800.1 HGHDPNVDVLYIGFTSKDAVP GAT-AKWKAKNAKEFEDSIKSI GDKLVAGLK-----A- 238  
 EAL84291.1 HGHDPNVDVLYIGFTSKDAVP GAT-AKWKAKNAKEFEDSIKSI GDKLVAGLK-----A- 238  
 AAO41660.1 HGHDPNVDVLYIGFTSKDAVP GAT-AKWKAKNAKEFEDSIKSI GDKLVAGLK-----A- 238  
 CAE54966.1 HGHDPNVDVLYIGFTSKDAVP GAT-AKWKAKNAKEFEDSIKSI GDKLVAGLK-----A- 238  
 AJG44374.1 NGHDQDDVLYIGFTGQDTPV GAS-AAWTASDTSTFEESIKGLGDR LVAKLS-----A- 242  
 KAJ6787168.1 AGHDQKDVMYIAFTGDEAVPGRDGAKWSAGSP EEFEDSIKALGDR LVASLP-----S- 234  
 ABY77913.1 NGHDPKDVLYIGFTGSGAVPGKSGANWKAKKTADFEASIKALGDKLVASLP-----A- 217  
 KAJ6783315.1 NGHDPKDVLYIAFTGADTPV GKNGANWKAKNTDDFAKSIKSLGDKLVGRL----- 232  
 AFG33049.1 NGHEGTDVLYIAFKGDDAVPGT-SADWSASSYEDFAASIKDFGDNLVAS----- 249  
 KAJ6786595.1 TSHTDPDVLYIAFKGEDAVPGKG GANWTAGNFDDFHASLVGLGDKLISRLE-----GD 238  
 KAJ6788818.1 SGHDDNDVLYIAFPGHDAVP GKNGAKW HASSYNEFANSITSLGDKLIQRIG-----GG 257  
 ABX57824.1 FGHGEDDVLYIAFPGSDAVPGAKGAKWTAKNFDEFQSSITTLGDKLIKRIG-----SS 258  
 BAA12799.1 FGHSDDDVLYIAFPGDAVP GAKGAKWNAKNFDEFQTSITSLGDKLIKRIG-----GT 258  
 KAJ6781651.1 QAHDNDILYIAFTGSDAVPGANGAKWNANSFSSFESSLGLGDR LVQRIG-----GG 255  
 KAJ6785337.1 EAHDDNDVLYIAFTGKGAVPGANGAKWNAESFDEFEASLQAQGD KLVAKIG-----GG 840  
 KAJ6783761.1 NGHDENDVLYIAFRGNQAVPGANGA AWNAKTTFTEFENSLAKIGDKLVKGIK-----G- 252  
 . \* \* : : \* \* . : \* : : \* \* \* : :  
  
 KAJ6781485.1 ----- 256  
 BAD08218.2 GNPPTTLTTSIPEPTGGSGSCSWPGHCAGATCSSNDDCSDDLTCQNGK CASDGS AETCS 314  
 ADG96019.1 DGGSPTTTTA---GSNPTSGSCEWEGHCAGASCKDENDCSDQLVCKSGKCPSD----- 304  
 BAA92250.1 ----- 245  
 ABZ88800.1 ----- 238  
 EAL84291.1 ----- 238  
 AAO41660.1 ----- 238  
 CAE54966.1 ----- 238  
 AJG44374.1 ----- 242



|              |                                                             |     |
|--------------|-------------------------------------------------------------|-----|
| KAJ6787168.1 | -----                                                       | 234 |
| ABY77913.1   | -----                                                       | 217 |
| KAJ6783315.1 | -----                                                       | 232 |
| AFG33049.1   | -----                                                       | 249 |
| KAJ6786595.1 | NGG-----DGCSWDGHCAGASCTRAQDCADQLTCVKGKCA-----               | 273 |
| KAJ6788818.1 | GGGNP-----PPSGGNC5WAGHCEGASCKNENDCSDSLVCKSGKCSR-----        | 300 |
| ABX57824.1   | SGGGT-----TPPPTCSWPGHCGATCKTGDDCSDDLICTNGKCSPP-----         | 300 |
| BAA12799.1   | NNGGGD-----TGGGSGNTCSWPGHCGAACKTGDDCSDDLICTKGKCSPP-----     | 304 |
| KAJ6781651.1 | GG5-NP-----GNPGNPPSCSWQGHCLGAKCSSDDDCDGNLQC-----KS--        | 294 |
| KAJ6785337.1 | DTGSNPTSTTASPGRPTNSPPPN--NENLNPKCAPGGNFDLGYFNLQLPVGGPDIKSKQ | 898 |
| KAJ6783761.1 | -----                                                       | 252 |

|              |                                                              |     |
|--------------|--------------------------------------------------------------|-----|
| KAJ6781485.1 | -----                                                        | 256 |
| BAD08218.2   | WEGHCKGATCSS--NDDCSDELACIS-G----ICSVDNGVETCE-----            | 351 |
| ADG96019.1   | -----                                                        | 304 |
| BAA92250.1   | -----                                                        | 245 |
| ABZ88800.1   | -----                                                        | 238 |
| EAL84291.1   | -----                                                        | 238 |
| AAO41660.1   | -----                                                        | 238 |
| CAE54966.1   | -----                                                        | 238 |
| AJG44374.1   | -----                                                        | 242 |
| KAJ6787168.1 | -----                                                        | 234 |
| ABY77913.1   | -----                                                        | 217 |
| KAJ6783315.1 | -----                                                        | 232 |
| AFG33049.1   | -----                                                        | 249 |
| KAJ6786595.1 | -----                                                        | 273 |
| KAJ6788818.1 | -----                                                        | 300 |
| ABX57824.1   | -----                                                        | 300 |
| BAA12799.1   | -----                                                        | 304 |
| KAJ6781651.1 | -HK-CSQ-----                                                 | 299 |
| KAJ6785337.1 | LQG-CNGYTGDTFFTDKSSGEMVLLAPGNPDLTGCATTSGSAHCRTELREVIHSSGANAA | 957 |
| KAJ6783761.1 | -----                                                        | 252 |

|              |                                                            |      |
|--------------|------------------------------------------------------------|------|
| KAJ6781485.1 | -----                                                      | 256  |
| BAD08218.2   | WEGHCEGASCSS---HDDCDGNLACKNGKCSA-----                      | 380  |
| ADG96019.1   | -----                                                      | 304  |
| BAA92250.1   | -----                                                      | 245  |
| ABZ88800.1   | -----                                                      | 238  |
| EAL84291.1   | -----                                                      | 238  |
| AAO41660.1   | -----                                                      | 238  |
| CAE54966.1   | -----                                                      | 238  |
| AJG44374.1   | -----                                                      | 242  |
| KAJ6787168.1 | -----                                                      | 234  |
| ABY77913.1   | -----                                                      | 217  |
| KAJ6783315.1 | -----                                                      | 232  |
| AFG33049.1   | -----                                                      | 249  |
| KAJ6786595.1 | -----                                                      | 273  |
| KAJ6788818.1 | -----                                                      | 300  |
| ABX57824.1   | -----                                                      | 300  |
| BAA12799.1   | -----                                                      | 304  |
| KAJ6781651.1 | -----                                                      | 299  |
| KAJ6785337.1 | WSPKGTNTLTVTMKVVKSDDGTHGTAIGQVFASEASKPLAEMYSPSGDIVVGVPDEDS | 1017 |
| KAJ6783761.1 | -----                                                      | 252  |

|              |       |     |
|--------------|-------|-----|
| KAJ6781485.1 | ----- | 256 |
| BAD08218.2   | ----- | 380 |
| ADG96019.1   | ----- | 304 |
| BAA92250.1   | ----- | 245 |
| ABZ88800.1   | ----- | 238 |
| EAL84291.1   | ----- | 238 |
| AAO41660.1   | ----- | 238 |
| CAE54966.1   | ----- | 238 |
| AJG44374.1   | ----- | 242 |
| KAJ6787168.1 | ----- | 234 |
| ABY77913.1   | ----- | 217 |
| KAJ6783315.1 | ----- | 232 |

|              |                                                               |      |
|--------------|---------------------------------------------------------------|------|
| AFG33049.1   | -----                                                         | 249  |
| KAJ6786595.1 | -----                                                         | 273  |
| KAJ6788818.1 | -----                                                         | 300  |
| ABX57824.1   | -----                                                         | 300  |
| BAA12799.1   | -----                                                         | 304  |
| KAJ6781651.1 | -----                                                         | 299  |
| KAJ6785337.1 | NQVVTKLGNVSVGTRKFTYVLNYSDDKLSISINGKTTALDTFNWDSPACYFKSGNYNQGKS | 1077 |
| KAJ6783761.1 | -----                                                         | 252  |
|              |                                                               |      |
| KAJ6781485.1 | -----                                                         | 256  |
| BAD08218.2   | -----                                                         | 380  |
| ADG96019.1   | -----                                                         | 304  |
| BAA92250.1   | -----                                                         | 245  |
| ABZ88800.1   | -----                                                         | 238  |
| EAL84291.1   | -----                                                         | 238  |
| AAO41660.1   | -----                                                         | 238  |
| CAE54966.1   | -----                                                         | 238  |
| AJG44374.1   | -----                                                         | 242  |
| KAJ6787168.1 | -----                                                         | 234  |
| ABY77913.1   | -----                                                         | 217  |
| KAJ6783315.1 | -----                                                         | 232  |
| AFG33049.1   | -----                                                         | 249  |
| KAJ6786595.1 | -----                                                         | 273  |
| KAJ6788818.1 | -----                                                         | 300  |
| ABX57824.1   | -----                                                         | 300  |
| BAA12799.1   | -----                                                         | 304  |
| KAJ6781651.1 | -----                                                         | 299  |
| KAJ6785337.1 | ATSSEVRIYSIDVVHK                                              | 1093 |
| KAJ6783761.1 | -----                                                         | 252  |

**Figure S4. Clustal alignment of *A. album* GH75 enzymes.** The eight sequences were aligned together with the GH75 chitosanases characterized in fungi ([http://www.cazy.org/GH75\\_characterized.html](http://www.cazy.org/GH75_characterized.html)) with the exception of the sequence EAQ87617 which is not complete. Boxed sequences correspond to the conserved motifs N(D)M(L)DIDCD and YGIWGD, typical of GH75 sequences.

**Figure S5**

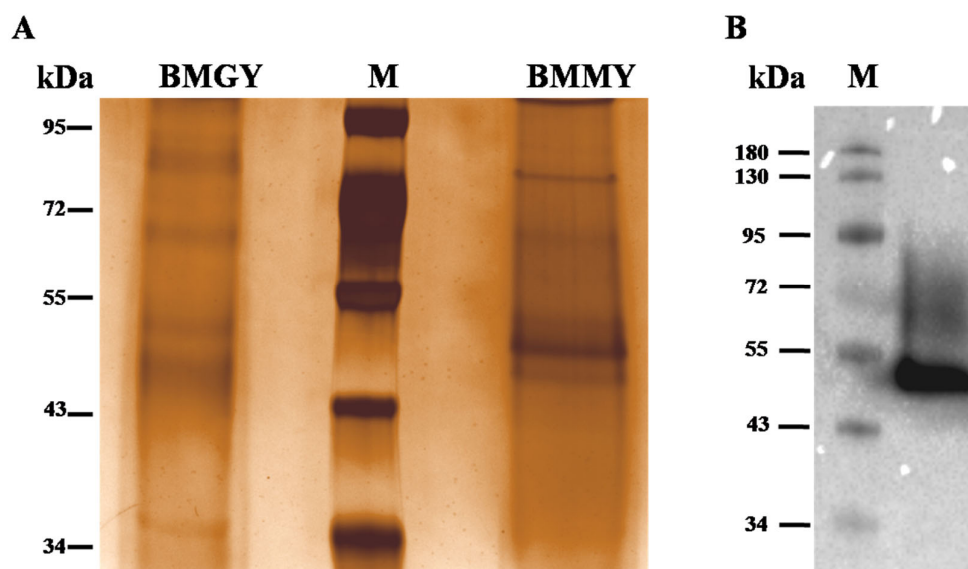

**Figure S5. Expression of recombinant Chi1 mature protein.** (A) SDS-PAGE on 15% biphasic polyacrylamide gel, M: Marker Protein (Thermo Scientific); BMGY (Buffered Glycerol-complex Medium): clone growth not induced with methanol; BMMY (Buffered Methanol-complex Medium): clone growth induced with methanol. Gel stained with silver staining. (B) Western blot of culture medium after expression in *Pichia pastoris* cells.

**Figure S6**

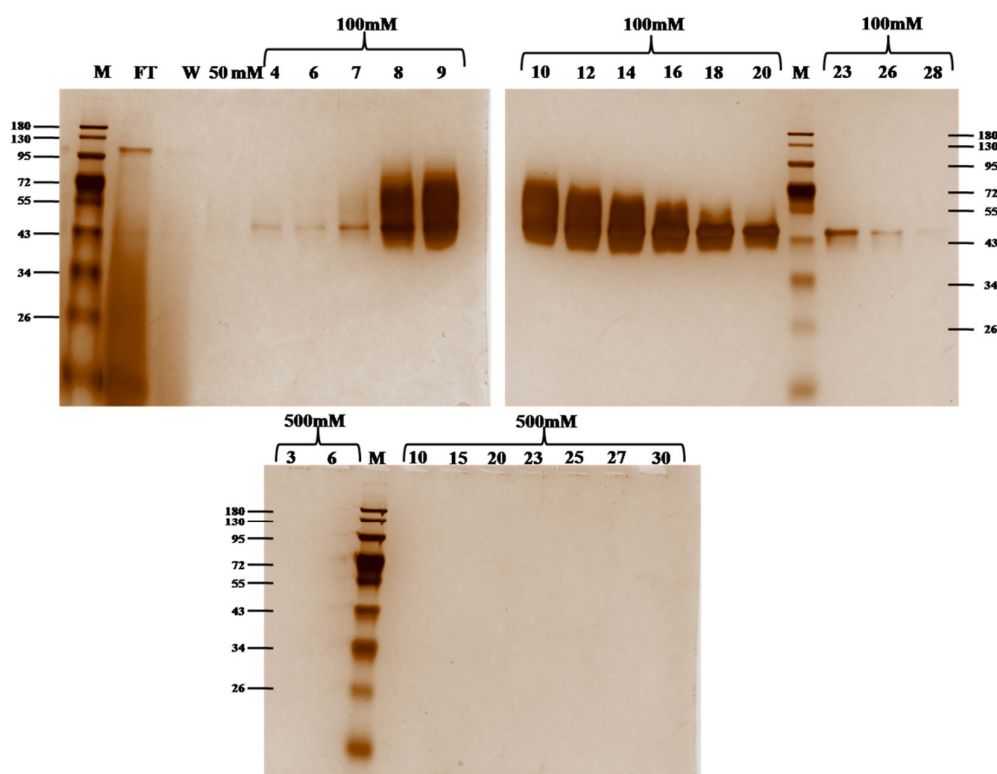

**Figure S6. SDS-PAGE (15% polyacrylamide gel) analysis of chromatographic fractions.** M: Marker PageRuler Prestained Protein Ladder (Thermo Scientific); FT: flow-through; W: washing fraction; 50 mM: fraction eluted with 50 mM imidazole EB; 100mM: fractions eluted with 100 mM imidazole EB; 500 mM: fractions eluted with 500 mM imidazole EB. Gels stained with silver staining.

**Figure S7**

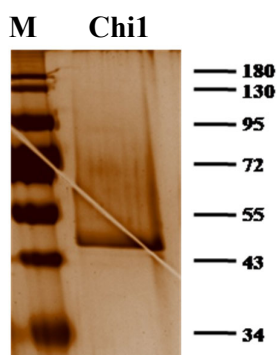

**Figure S7. SDS-PAGE (15% polyacrylamide gel) of the purified Chi1 recombinant protein.** M: Marker PageRuler Prestained Protein Ladder (Thermo Scientific). Chi1: purified recombinant Chi1 protein after dialysis. Gel stained with silver staining.
